# Supplementary material for: Trends in inpatient and post-discharge mortality among young infants admitted to Kilifi County Hospital, Kenya: a retrospective cohort study
Source: PubMed Central journal article supplement (PMC9835934; doi:10.1136/bmjopen-2022-067482), 2023-01-11

# BMJ Open

BMJ Open is committed to open peer review. As part of this commitment we make the peer review history of every article we publish publicly available.

When an article is published we post the peer reviewers' comments and the authors' responses online. We also post the versions of the paper that were used during peer review. These are the versions that the peer review comments apply to.

The versions of the paper that follow are the versions that were submitted during the peer review process. They are not the versions of record or the final published versions. They should not be cited or distributed as the published version of this manuscript.

BMJ Open is an open access journal and the full, final, typeset and author-corrected version of record of the manuscript is available on our site with no access controls, subscription charges or pay-per-view fees (<http://bmjopen.bmj.com>).

If you have any questions on BMJ Open's open peer review process please email [info.bmjopen@bmj.com](mailto:info.bmjopen@bmj.com)

# BMJ Open

## Inpatient and post-discharge mortality among young infants in rural Kenya.

|                               |                                                                                                                                                                                                                                                                                                                                                                                                                                                                                                                                                                                                                                           |
|-------------------------------|-------------------------------------------------------------------------------------------------------------------------------------------------------------------------------------------------------------------------------------------------------------------------------------------------------------------------------------------------------------------------------------------------------------------------------------------------------------------------------------------------------------------------------------------------------------------------------------------------------------------------------------------|
| Journal:                      | <i>BMJ Open</i>                                                                                                                                                                                                                                                                                                                                                                                                                                                                                                                                                                                                                           |
| Manuscript ID                 | bmjopen-2022-067482                                                                                                                                                                                                                                                                                                                                                                                                                                                                                                                                                                                                                       |
| Article Type:                 | Original research                                                                                                                                                                                                                                                                                                                                                                                                                                                                                                                                                                                                                         |
| Date Submitted by the Author: | 18-Aug-2022                                                                                                                                                                                                                                                                                                                                                                                                                                                                                                                                                                                                                               |
| Complete List of Authors:     | Talbert, Alison; KEMRI-Wellcome Trust Research Programme Ngari, Moses; KEMRI-Wellcome Trust Research Programme Obiero, Christina; KEMRI-Wellcome Trust Research Programme; University of Amsterdam, Department of Global Health Nyaguara, A.; KEMRI-Wellcome Trust Research Programme Mwangome, MK; KEMRI-Wellcome Trust Research Programme Mturi, Neema; KEMRI-Wellcome Trust Research Programme Ouma, Nelson; KEMRI-Wellcome Trust Research Programme Otiende, M.; KEMRI-Wellcome Trust Research Programme Berkley, James ; KEMRI-Wellcome Trust Research Programme; University of Oxford, Centre for Tropical Medicine & Global Health |
| Keywords:                     | Epidemiology < TROPICAL MEDICINE, PAEDIATRICS, NEONATOLOGY                                                                                                                                                                                                                                                                                                                                                                                                                                                                                                                                                                                |
|                               |                                                                                                                                                                                                                                                                                                                                                                                                                                                                                                                                                                                                                                           |

SCHOLARONE™  
Manuscripts

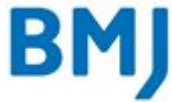

I, the Submitting Author has the right to grant and does grant on behalf of all authors of the Work (as defined in the below author licence), an exclusive licence and/or a non-exclusive licence for contributions from authors who are: i) UK Crown employees; ii) where BMJ has agreed a CC-BY licence shall apply, and/or iii) in accordance with the terms applicable for US Federal Government officers or employees acting as part of their official duties; on a worldwide, perpetual, irrevocable, royalty-free basis to BMJ Publishing Group Ltd ("BMJ") its licensees and where the relevant Journal is co-owned by BMJ to the co-owners of the Journal, to publish the Work in this journal and any other BMJ products and to exploit all rights, as set out in our [licence](#).

The Submitting Author accepts and understands that any supply made under these terms is made by BMJ to the Submitting Author unless you are acting as an employee on behalf of your employer or a postgraduate student of an affiliated institution which is paying any applicable article publishing charge ("APC") for Open Access articles. Where the Submitting Author wishes to make the Work available on an Open Access basis (and intends to pay the relevant APC), the terms of reuse of such Open Access shall be governed by a Creative Commons licence – details of these licences and which [Creative Commons](#) licence will apply to this Work are set out in our licence referred to above.

Other than as permitted in any relevant BMJ Author's Self Archiving Policies, I confirm this Work has not been accepted for publication elsewhere, is not being considered for publication elsewhere and does not duplicate material already published. I confirm all authors consent to publication of this Work and authorise the granting of this licence.

## 1 Inpatient and post-discharge mortality among young infants in rural 2 Kenya.

3 Alison Talbert MRCP<sup>1</sup>, Moses Ngari PhD<sup>1,2</sup>, Christina Obiero MPH<sup>1,3</sup>, Amek Nyaguara PhD<sup>1</sup>,  
4 Martha Mwangome PhD<sup>1,2</sup>, Neema Mturi MRCP<sup>1</sup>, Nelson Ouma BSc<sup>1</sup>, Mark Otiende MSc<sup>1</sup>, and  
5 James A Berkley FRCPCH<sup>1,2,4</sup>

### 6 Institutions of affiliation

- 8 1. KEMRI/Wellcome Trust Research Programme, Centre for Geographic Medicine Research  
9 -Coast, PO Box 230 - 80108, Kilifi, Kenya.
- 10 2. The Childhood Acute Illness & Nutrition Network (CHAIN), Nairobi, Kenya.
- 11 3. Department of Global Health, University of Amsterdam, Amsterdam, The Netherlands
- 12 4. Center for Tropical Medicine & Global Health, University of Oxford, Oxford, UK.

14 Corresponding author: Alison Talbert Email: [ATalbert@kemri-wellcome.org](mailto:ATalbert@kemri-wellcome.org)

15 P.O Box 230, Kilifi, 80108 Kenya Phone: +254 729 218993

17 Word count 3810

## 18 Abstract

19 **Objectives:** to describe admission trends and measure inpatient and post-discharge mortality  
20 and its associated exposures, among young infants (YI) admitted to a county hospital in Kenya

21 **Design:** retrospective cohort study

22 **Setting:** secondary level hospital

23 **Participants:** YI aged less than 60 days admitted to hospital January 2009 to December 2019:  
24 12,271 admissions in 11,877 individuals. YI who were resident within a health and  
25 demographic surveillance system (KHDSS) ; were followed up for 1 year after discharge.

26 **Primary and secondary outcome measures:** Inpatient and 1 year post-discharge mortality

27 **Results:** Of 12,271 YI admissions, 4,421 (36%) were KHDSS-resident. Neonatal sepsis, preterm  
28 complications and birth asphyxia accounted for 83% of admissions. The proportion of YI among  
29 under-fives admissions increased from 19% in 2009 to 34% in 2019 ( $P_{\text{trend}}=0.02$ ). Inpatient case  
30 fatality was 16%, with 66% of deaths occurring within 48 hours of admission. The introduction  
31 of free maternity care in 2013 was not associated with a change in admissions or inpatient  
32 mortality among YI. During 1-year post-discharge, 208/3625 (5.7%) YI died, 64.3 (95%CI 56.2–  
33 73.7) per 1,000 infant-years; 49% of post-discharge deaths occurred within one month of  
34 discharge, and 49% of post-discharge deaths occurred at home. Both inpatient and post-  
35 discharge deaths were associated with low weight. Inpatient mortality was associated with  
36 clinical signs of disease severity, while post-discharge mortality was associated with length of  
37 hospitalization, leaving against advice and referral to a specialized hospital.

1  
2  
3 38 **Conclusions:** Young infants accounted for an increasing proportion of paediatric admissions and  
4  
5  
6 39 inpatient deaths. The post-discharge mortality rate of YI is more than twice that of children aged  
7  
8 40 2-59 months. The proportion of deaths occurring post-discharge is lower than among older  
9  
10 41 children, but similarly, almost half of post-discharge deaths occur in the first month, and half  
11  
12  
13 42 occurred at home.

14  
15 43 **Key words**

16  
17  
18  
19 44 Young infant; mortality; inpatient; post-discharge; Africa; Kenya  
20  
21

22 45 290 words  
23  
24  
25  
26  
27  
28  
29  
30  
31  
32  
33  
34  
35  
36  
37  
38  
39  
40  
41  
42  
43  
44  
45  
46  
47  
48  
49  
50  
51  
52  
53  
54  
55  
56  
57  
58  
59  
60

1  
2  
3  
4 585  
6  
7 598  
9  
10 **Article summary**11  
12 **Strengths and limitations of this study**

- 13
- 
- 14
- 
- 15 62
- Large sample size with systematic collection of data
- 16
- 
- 17 63
- Linkage to a well-established demographic surveillance system, with few losses to follow
- 18
- 
- 19 up.

- 20 64
- 
- 21
- 
- 22 65
- Lack of accurate gestational age estimation and unknown birthweight of most
- 23
- 
- 24 participants.

- 25 66
- 
- 26
- 
- 27 67
- Data are from a single hospital
- 28
- 
- 29
- 
- 30
- 
- 31 68
- 
- 32
- 
- 33 69
- 
- 34
- 
- 35
- 
- 36
- 
- 37
- 
- 38
- 
- 39
- 
- 40
- 
- 41
- 
- 42
- 
- 43
- 
- 44
- 
- 45
- 
- 46
- 
- 47
- 
- 48
- 
- 49
- 
- 50
- 
- 51
- 
- 52
- 
- 53
- 
- 54
- 
- 55
- 
- 56
- 
- 57
- 
- 58
- 
- 59
- 
- 60

## 70 Background

71 The United Nations Sustainable Development Goal 3 aims to ensure healthy living and promote  
72 wellbeing for all ages, with all countries aiming to reduce neonatal and under-five mortality to  
73 below 12 and 25 per 1,000 live births by 2030 respectively. In sub-Saharan Africa, child mortality  
74 has declined by ~58% in the last 30 years. However, the estimated neonatal and under-five  
75 mortality rates in sub-Saharan Africa remained high in 2019 (27 and 76 per 1,000 live births  
76 respectively) with a similar neonatal mortality rate of 27 per 1,000 live births in Kenya.(1)  
77 Combined neonatal and post-neonatal infant mortality accounts for over three quarters of all  
78 under-five deaths in Kenyan children.(2)

79 Young infants aged <60 days old (YI) comprise around half of hospital admissions in sub-Saharan  
80 Africa and continue to face high risk of in-hospital mortality and long-term neuro-disability.(3-6)  
81 Post-discharge mortality is emerging as a major problem in children in low- and middle-income  
82 countries (LMICs),(7) however, there are limited data among YI. A systematic review of paediatric  
83 post-discharge mortality in developing countries included 24 studies published up to July 2017  
84 with 19 from Africa.(8) Four studies included YI. Although young age was reported as a risk factor  
85 of mortality, no studies specifically identified deaths among infants aged <60 days. We have  
86 previously demonstrated excess post-discharge mortality among all hospitalised children,  
87 suggesting that hospitalisation itself selects vulnerable children with a sustained increased risk  
88 of dying over the longer term.(7, 9)



1  
2  
3 89 Better understanding of YI deaths occurring during hospitalisation and after discharge from  
4  
5  
6 90 hospital is vital for development and use of targeted interventions aimed at improving survival.  
7  
8  
9 91 This analysis aimed to describe admission trends and measure inpatient and post-discharge  
10  
11 92 mortality and its associated exposures, including the introduction of free maternity care, among  
12  
13  
14 93 YI admitted to Kilifi County Hospital (KCH), Kenya and followed up through the Kilifi Health and  
15  
16 94 Demographic Surveillance System (KHDSS).  
17  
18  
19  
20  
21  
22  
23  
24  
25  
26  
27  
28  
29  
30  
31  
32  
33  
34  
35  
36  
37  
38  
39  
40  
41  
42  
43  
44  
45  
46  
47  
48  
49  
50  
51  
52  
53  
54  
55  
56  
57  
58  
59  
60

95

## 96 **Methods**

### 97 Study participants and design

98 KCH is a secondary-level referral hospital situated in Kilifi county along the Kenyan coast. It serves  
99 a rural and peri-urban population. It has a maternity unit. with approximately 6,000 deliveries  
100 per year, a general paediatric ward with a newborn unit for babies aged less than 1 month, and  
101 a paediatric High Dependency Unit (HDU) that also admits YIs. The year 2009 was selected as a  
102 starting point, because a previous analysis of mortality among YI covered admissions from 1990  
103 to 2008(10). Free maternity care was introduced by the Kenyan government on 1<sup>st</sup> June 2013 and  
104 led to a marked increase in health facility births.(11)

105 The KHDSS, established in 2002, covers a population of 279,158 within an area of 900km<sup>2</sup> centred  
106 on KCH.(12) Census rounds visit each household every four months to ascertain vital status and  
107 migration in and out of the hospital catchment area.

108 We conducted a retrospective cohort study of YIs resident within the KHDSS who were admitted  
109 to KCH between January 1<sup>st</sup>, 2009 and December 31<sup>st</sup>, 2019. Children discharged alive and  
110 followed up in KHDSS census rounds until March 2021 were eligible for analyses of post-discharge  
111 mortality. During the study period, there were 9 health workers' strikes with the last nurses'  
112 strike lasting for 150 days (5 June to 2 November 2017).(13) **Supplementary Table S1.** For  
113 comparison, we also examined admissions aged 60 days to 59 months during the same period.

114

1  
2  
3 115 Procedures  
4  
5

6  
7 116 At admission, standardised medical history, and clinical examination, including anthropometric  
8  
9 117 measurements were obtained by trained clinical staff. Blood samples were systematically taken  
10  
11 118 for complete blood count, slide for malaria microscopy, and clinical chemistry, Human  
12  
13 119 Immunodeficiency Virus (HIV) antibody test and blood culture at hospital admission, as described  
14  
15 120 previously.(14) A lumbar puncture for cerebrospinal fluid (CSF) analysis was done at admission in  
16  
17 121 infants in whom sepsis was suspected and deferred in those seriously ill or with other  
18  
19 122 contraindications. Clinical and laboratory data were recorded in real time on a ward surveillance  
20  
21 123 database linked to the KHDSS database. Empiric antibiotics were initiated according to national  
22  
23 124 guidelines(15) with ampicillin/benzylpenicillin plus gentamicin as first-line intravenous therapy.  
24  
25 125 Second-line and subsequent antimicrobial therapy was guided by blood culture results and  
26  
27 126 clinical progress. Mechanical ventilation was not available at KCH.  
28  
29  
30  
31  
32  
33

34 127 Statistical methods  
35  
36

37 128 *Study variables*  
38  
39

40  
41 129 Outcomes of interest were death in hospital and during 1 year after discharge. Exposures of  
42  
43 130 interest were demographic, nutritional, clinical features, and haematological, biochemical, and  
44  
45 131 microbiological findings at the time of admission. De-identified study data were deposited in the  
46  
47 132 Harvard Dataverse depository.(16)  
48  
49  
50

51 133  
52  
53  
54

55 134  
56  
57  
58  
59  
60

1  
2  
3 135  
4  
5  
6 136 Weight at admission and mid-upper arm circumference (MUAC) were categorised as shown on  
7  
8  
9 137 **Table 1.** Because approximately 40% of the YI were underweight (<2.5kg), and 60% were aged ≤2  
10  
11 138 days at admission, admission weights rather than anthropometric Z scores using WHO standards  
12  
13 139 were reported. Furthermore, most YI who were born at home or in other hospitals and referred  
14  
15  
16 140 to KCH were missing gestational age estimates and birth weight to be able to estimate gestational  
17  
18 141 age at birth using the INTERGROWTH 21st Newborn Size Standards (INSS).

19  
20  
21 142 Prematurity was defined as gestation age <37 weeks and LBW as birth weight <2500 grams for  
22  
23 143 YIs born at KCH. Admission blood glucose was categorized into <2.6, 2.6 to 7.0 and ≥7.0 mmol/l  
24  
25 144 representing low, normal and high levels respectively.(15) Missing data were not assumed to be  
26  
27 145 missing at random. We, therefore, created categorical variables and added a missing category  
28  
29 146 which was included in the regression analysis.

30  
31  
32 147 Demographic, anthropometric, and clinical data are presented as frequencies and proportions  
33  
34 148 for categorical variables and means (standard deviation (sd)) or median (interquartile range  
35  
36 149 (IQR)) for continuous variables depending on the underlying distribution. Proportions of missing  
37  
38 150 data for each variable are shown on **Supplementary Table S2.**

39  
40  
41 151 Monthly admissions and case fatality were plotted against time (month of admission) to visually  
42  
43 152 inspect the trend from 2009 to 2019 and the predicted trend line superimposed on the curves.  
44  
45 153 We used the Augmented Dickey Fuller test (ADF test) to test if the time series were stationary  
46  
47 154 (no trend or seasonal effects). We also presented annual absolute admissions, proportion of YI  
48  
49 155 among all admissions <60 months and case fatality. Monthly admissions and case fatality were

1  
2  
3 156 tested for annual linear trend using an extension of the Wilcoxon rank-sum test of trend across  
4  
5  
6 157 ordered groups.(17)  
7

8  
9 158 We used interrupted time series analysis to estimate the level and trend changes before and  
10  
11 159 after introduction of free maternity care (1st June 2013). We created a time variable coded  
12  
13 160 sequentially from 1 to 132 representing the months from January 2009 to December 2019 and  
14  
15  
16 161 free maternity care was coded as 0 before June 2013 and 1 from June 2013. We defined seasonal  
17  
18 162 effect variable using month of the year modelled on harmonic terms using the fourier code in  
19  
20  
21 163 STATA. To measure the effect of free maternity care, we used the negative binomial regression  
22  
23 164 model because of presence of overdispersion in the trends and reported regression coefficients  
24  
25  
26 165 transformed into incidence rate ratios (IRR). All the negative binomial regression models included  
27  
28 166 the dependent variable of interest e.g. the monthly number of admissions, and the following  
29  
30  
31 167 independent variables: the time variable, the binary pre- and post- free maternity care variable  
32  
33 168 and the seasonal effect variable.  
34  
35

36 169 Since YIs could be admitted more than once whilst <60 days old, we included multiple admissions  
37  
38  
39 170 using unique IDs and adjusted for clustering by individual with robust standard errors. To identify  
40  
41 171 exposures associated with inpatient death, we treated being discharged alive as a competing  
42  
43  
44 172 event and fitted the proportional sub-distribution hazard model using the Fine-Gray competing  
45  
46 173 risk model.(18) The measure of effect reported from the model was the sub-distribution hazard  
47  
48 174 ratios (SHR) and their respective 95% confidence intervals (CI). To build the multivariable  
49  
50  
51 175 regression model, a backward stepwise approach was used where all the independent variables  
52  
53 176 assessed in the univariate models were included in the model and only those with a P-value <0.1  
54  
55  
56 177 retained in the final multivariable model.  
57  
58  
59  
60

1  
2  
3 178 For the post-discharge analysis, only data from those YI discharged alive and resident within the  
4  
5  
6 179 KHDSS were analysed. Time at risk was defined from date of discharge to 365 days later or  
7  
8 180 censure at date of death or outmigration from the KHDSS. We performed a ‘multiple discharges’  
9  
10  
11 181 analysis where YI with multiple admissions had their follow-up time reset at each successive  
12  
13 182 discharge date. Exposures associated with post-discharge assessed using a Cox proportional  
14  
15 183 hazards regression model with robust standard errors accounting for YI with multiple discharges.  
16  
17  
18 184 The proportional hazards assumption was assessed using the scaled Schoenfeld residuals test  
19  
20 185 **(Supplementary Tables S3 and S4)**. All exposures assessed in the univariate models were  
21  
22  
23 186 considered for inclusion in the multivariable Cox proportional hazards regression model using a  
24  
25 187 backward stepwise approach. Both the inpatient and post-discharge multivariable regression  
26  
27  
28 188 models’ discrimination performance were assessed using bootstrapped area under receiver  
29  
30 189 operating characteristic curves (AUC) replicated 1000 times.

31  
32  
33 190 As sensitivity analysis, we assessed the YI born at KCH and enrolled to the Kilifi Perinatal and  
34  
35  
36 191 Maternal Research Project (KIPMAT), which had collected comprehensive birth data including  
37  
38 192 birth weight and gestational age (weeks).<sup>(19)</sup> We estimated their birthweight Z scores using the  
39  
40  
41 193 INTERGROWTH Newborn Size Standards (INSS) and ran the regression models replacing  
42  
43 194 admission weight with birthweight Z score.<sup>(20)</sup>

44  
45  
46 195 Statistical significance was evaluated using 95% CI and a two-tailed *P*-value <0.05. Statistical  
47  
48  
49 196 analyses were conducted using STATA Version 17.0 (College Station, TX, USA).

50  
51 197 *Study size*

1  
2  
3 198 With 3,625 YIs discharged alive and included in the post-discharge analysis, a post-discharge  
4  
5  
6 199 mortality of 5.7% and a two-sided alpha of 0.05, the study had greater than 80% power, to detect  
7  
8 200 hazard ratio of  $\geq 2.0$  of death between YIs with admission weight  $< 1.5$  Kg compared to those with  
9  
10 201 weight  $\geq 2.5$  Kg.

#### 11 12 13 202 Ethical considerations

14  
15  
16 203 Written consent was provided by the caregivers of all the surveillance study participants. Ethical  
17  
18 204 approval to conduct this analysis was granted by the Kenya Medical Research Institute (KEMRI)  
19  
20  
21 205 National Ethics Review Committee (SCC 2778).

#### 22 23 24 206 Patient and public involvement

25  
26  
27 207 There was no patient and public involvement in the planning or execution of this retrospective  
28  
29 208 cohort study.

30  
31  
32  
33 209

## 210 Results

### 211 Baseline characteristics

212 During the study period, there were 42,742 paediatric admissions to KCH, of which 12,271 (29%)  
213 admission events among 11,877 individuals were aged <60 days. Of the 12,271 YI admission  
214 events, 4,421 (36%) were resident in the KHDSS and included in the analysis (**Figure 1**). This  
215 comprised 4,272 individual YI: 4,131 with one admission, 133 two admissions and 8 three  
216 admissions within the first 60 days of life.

### 217 KHDSS-resident admissions

218 Among the 4,421 YI admission events among KHDSS residents, 2,731 (62%) were  $\leq 2$  days old and  
219 1,900 (43%) were female. Reported prematurity and low birth weight were 1,019 (23%) and 581  
220 (13%) respectively. Low weight (<2.5kg) was observed in 1694 YIs (38%) while 1342 (30%) had  
221 MUAC <9.0cm. Common presenting clinical signs were lower chest wall indrawing (46%) and  
222 breathing difficulty (49%). Thirty percent had fever, 31% had hypothermia and 30% tachycardia.  
223 Nine hundred and thirty-two YI (21%) had hypoxia ( $\text{SaO}_2 < 90\%$ ) at admission and 250 (5.7%) had  
224 impaired consciousness. Presenting signs at admission for all the YI stratified by KHDSS residence  
225 are shown on **Table 1**. Malaria was very rare ( $n=4$ , 0.09%) whilst 142 (3.2%) and 170 (3.9%) YI  
226 were HIV antibody positive and had bacteraemia respectively. **Supplementary Table S5** lists the  
227 bacterial isolates that were presumed pathogens, led by *Klebsiella pneumoniae*, *Escherichia coli*,  
228 *Staphylococcus aureus* and Group B Streptococcus.

229



230 **Table 1. Study participants characteristics at admission.**

|                                   | All young infant admissions (N=12,271) <sup>a</sup> | Young infant admissions KHDSS residents (N=4,421) | Young infant admissions non-KHDSS residents (N=7,850) | p-value |
|-----------------------------------|-----------------------------------------------------|---------------------------------------------------|-------------------------------------------------------|---------|
| <b>Demographics</b>               |                                                     |                                                   |                                                       |         |
| Age in days                       |                                                     |                                                   |                                                       |         |
| 0 to 2                            | 7856 (64)                                           | 2731 (62)                                         | 5125 (65)                                             | <0.001  |
| 3 to 7                            | 1384 (11)                                           | 468 (11)                                          | 916 (12)                                              |         |
| 8 to 28                           | 1506 (12)                                           | 587 (13)                                          | 919 (12)                                              |         |
| >28                               | 1525 (12)                                           | 635 (14)                                          | 890 (11)                                              |         |
| Sex (female)                      | 5245 (43)                                           | 1900 (43)                                         | 3345 (43)                                             | 0.70    |
| Reported born premature           | 2970 (24)                                           | 1019 (23)                                         | 1951 (25)                                             | 0.005   |
| Reported low birth weight         | 1782 (15)                                           | 581 (13)                                          | 1201 (15)                                             | <0.001  |
| <b>Anthropometry</b>              |                                                     |                                                   |                                                       |         |
| Weight (kg)                       |                                                     |                                                   |                                                       |         |
| <1.5                              | 1767 (14)                                           | 566 (13)                                          | 1201 (15)                                             | <0.001  |
| 1.5 to <2.5                       | 3211 (26)                                           | 1128 (26)                                         | 2083 (27)                                             |         |
| ≥2.5                              | 7193 (59)                                           | 2684 (61)                                         | 4509 (57)                                             |         |
| Missing                           | 100 (0.8)                                           | 43 (1.0)                                          | 57 (0.7)                                              |         |
| MUAC (cm)                         |                                                     |                                                   |                                                       |         |
| <9                                | 3933 (32)                                           | 1342 (30)                                         | 2591 (33)                                             | <0.001  |
| 9 to 10                           | 2492 (20)                                           | 862 (20)                                          | 1630 (21)                                             |         |
| 10 to 11                          | 2926 (24)                                           | 1035 (23)                                         | 1891 (24)                                             |         |
| ≥11                               | 2622 (21)                                           | 1056 (24)                                         | 1566 (20)                                             |         |
| Missing                           | 298 (2.4)                                           | 126 (2.9)                                         | 172 (2.2)                                             |         |
| <b>Clinical features</b>          |                                                     |                                                   |                                                       |         |
| Axillary temperature              |                                                     |                                                   |                                                       |         |
| <36°C                             | 3553 (29)                                           | 1358 (31)                                         | 2195 (28)                                             | <0.001  |
| 36 to 37.5°C                      | 4692 (38)                                           | 1711 (39)                                         | 2981 (38)                                             |         |
| >37.5°C                           | 3948 (32)                                           | 1318 (30)                                         | 2630 (34)                                             |         |
| Respiratory rate/min <sup>b</sup> |                                                     |                                                   |                                                       |         |
| Bradypnoea                        | 540 (4.4)                                           | 188 (4.3)                                         | 352 (4.5)                                             | 0.56    |
| Normal                            | 7333 (60)                                           | 2647 (60)                                         | 4686 (60)                                             |         |
| Tachypnoea                        | 4158 (34)                                           | 1490 (34)                                         | 2668 (34)                                             |         |
| Missing                           | 240 (2.0)                                           | 96 (2.2)                                          | 144 (1.8)                                             |         |
| Heart rate/min <sup>c</sup>       |                                                     |                                                   |                                                       |         |
| Bradycardia                       | 396 (3.2)                                           | 158 (3.6)                                         | 238 (3.0)                                             | 0.11    |
| Normal                            | 8162 (67)                                           | 2910 (66)                                         | 5252 (67)                                             |         |
| Tachycardia                       | 3667 (30)                                           | 1331 (30)                                         | 2336 (30)                                             |         |
| Missing                           | 46 (0.4)                                            | 22 (0.5)                                          | 24 (0.3)                                              |         |
| Hypoxia <sup>d</sup>              | 2668 (22)                                           | 932 (21)                                          | 1736 (22)                                             | 0.19    |
| Lower chest wall indrawing        | 5562 (45)                                           | 2051 (46)                                         | 3511 (45)                                             | 0.13    |
| Wheeze                            | 112 (0.9)                                           | 46 (1.0)                                          | 66 (0.8)                                              | 0.41    |

|                                                           |            |           |           |        |
|-----------------------------------------------------------|------------|-----------|-----------|--------|
| Stridor                                                   | 62 (0.5)   | 19 (0.4)  | 43 (0.6)  | 0.48   |
| Breathing difficulty                                      | 5966 (49)  | 2172 (49) | 3794 (48) | 0.44   |
| Cyanosis                                                  | 560 (4.6)  | 210 (4.8) | 350 (4.5) | 0.54   |
| Capillary refill >2 seconds                               | 301 (2.6)  | 105 (2.4) | 196 (2.5) | 0.81   |
| Temperature gradient                                      | 710 (5.8)  | 258 (5.8) | 452 (5.8) | 0.73   |
| Weak pulse                                                | 463 (3.8)  | 157 (3.6) | 306 (3.9) | 0.05   |
| Lethargy                                                  | 971 (7.9)  | 325 (7.4) | 646 (8.2) | 0.15   |
| Impaired consciousness <sup>e</sup>                       | 792 (6.5)  | 250 (5.7) | 542 (6.9) | 0.007  |
| Bulging fontanel                                          | 111 (0.9)  | 32 (0.7)  | 79 (1.0)  | 0.21   |
| Stiff neck                                                | 48 (0.4)   | 10 (0.2)  | 38 (0.5)  | 0.05   |
| Convulsions                                               | 689 (5.6)  | 197 (4.5) | 492 (6.3) | <0.001 |
| Sunken eyes                                               | 134 (1.1)  | 44 (1.0)  | 90 (1.2)  | 0.44   |
| Reduced skin turgor                                       | 308 (2.5)  | 97 (2.2)  | 211 (2.7) | 0.19   |
| Pallor                                                    | 633 (5.2)  | 221 (5.0) | 412 (5.3) | 0.55   |
| <b>Laboratory features</b>                                |            |           |           |        |
| Meningitis <sup>f</sup>                                   | 98 (0.8)   | 33 (0.8)  | 65 (0.8)  | 0.87   |
| Haemoglobin <11 g/dl) <sup>g</sup>                        | 1207 (9.8) | 476 (11)  | 731 (9.3) | 0.02   |
| HIV antibody positive                                     | 441 (3.6)  | 142 (3.2) | 299 (3.8) | 0.11   |
| Malaria slide positive                                    | 5 (0.04)   | 4 (0.09)  | 1 (0.01)  | 0.02   |
| Bacteraemia                                               | 590 (4.8)  | 170 (3.9) | 420 (5.4) | <0.001 |
| White blood cells (10 <sup>12</sup> cells/L) <sup>h</sup> |            |           |           |        |
| <4                                                        | 134 (1.1)  | 54 (1.2)  | 80 (1.0)  | <0.001 |
| 4–20                                                      | 8738 (71)  | 3228 (73) | 5510 (70) |        |
| >20                                                       | 2202 (18)  | 690 (16)  | 1512 (19) |        |
| unavailable                                               | 1197 (9.8) | 449 (10)  | 748 (9.5) |        |
| Platelets (10 <sup>9</sup> cells/L) <sup>i</sup>          |            |           |           |        |
| <150 cells/L                                              | 1615 (13)  | 586 (13)  | 1029 (13) | 0.59   |
| ≥150                                                      | 9455 (77)  | 3387 (77) | 6068 (77) |        |
| unavailable                                               | 1201 (9.8) | 448 (10)  | 753 (9.6) |        |
| Blood glucose (mmols/L)                                   |            |           |           |        |
| <2.6                                                      | 2479 (20)  | 882 (20)  | 1597 (20) | 0.29   |
| 2.6 to 7.0                                                | 5086 (41)  | 1875 (42) | 3211 (41) |        |
| >7.0                                                      | 688 (5.6)  | 231 (5.2) | 457 (5.8) |        |
| unavailable                                               | 4018 (33)  | 1433 (32) | 2585 (33) |        |

<sup>a</sup>-Eligible admissions were young infants aged <60days admitted from 2009 to 2019, <sup>b</sup>- Tachypnoea: respiratory rate ≥60 breaths/min, Bradypnoea: respiratory rate <30 breaths/min, <sup>c</sup>-Tachycardia: heart rate>160 beats/min, Bradycardia: heart rate<100 beats/min, <sup>d</sup>-Hypoxia: oxygen saturation<90%,<sup>e</sup>- Impaired consciousness level if 'prostrate' or 'unconscious', <sup>f</sup> Meningitis: positive CSF culture, or positive CSF microscopy, or positive CSF antigen test, or elevated CSF WBC count (≥20 in young infants aged 0-28 days OR, ≥10 in young infants aged 29-59 days) PLUS a positive blood culture for a known pathogen, <sup>g</sup> Anaemia: haemoglobin <11 g/dl, <sup>h</sup> Normal values WBC 4-20 x 10<sup>12</sup> cells/L, Leucopenia WBC <4 x 10<sup>12</sup> cells/L, Leucocytosis WBC >20 x 10<sup>12</sup> cells/L, <sup>i</sup> Normal values Platelets ≥150x10<sup>9</sup> cells/L, Thrombocytopenia <150x10<sup>9</sup> cells/L, KHDSS: Kilifi Health and Demographic Surveillance System, MUAC: Mid-upper arm circumference.

## 231 Admissions over time

232 The annual number of admissions are shown in **Supplementary Table S6**. The overall proportion  
233 of YI among all admissions under 5 years old was 28% (95%CI 27–29%), increasing from 19% in  
234 2009 to 34% in 2019 (test of linear trend  $P=0.02$ ) **Figure 2**. **Figure 3A** shows the upward trend of  
235 absolute YI admissions and downward trends for 2 to 59-month-olds and all admissions <60  
236 months old (all P-values for tests for stationarity <0.05). There was no significant difference in  
237 monthly YI admissions before introduction of free maternity care in June 2013 (monthly median  
238 [IQR] of 76 [66–96] admissions) and after June 2013 (monthly median [IQR] of 95 [78–125]  
239 admissions) season-adjusted IRR 1.06 (95%CI 0.54–2.09)  $P=0.86$  (**Supplementary Figure S1A**).  
240 The mean monthly YI admissions on day of birth did not differ before and after June 2013; season-  
241 adjusted IRR 0.88 (95%CI 0.44 to 1.76),  $P=0.72$ . The proportion of YI admissions to total  
242 admissions aged <60 months before and after June 2013 were not different; season-adjusted IRR  
243 1.02 (95%CI 0.28–3.71)  $P=0.97$  **Figure 3D**. We found no significant difference in monthly absolute  
244 admissions (all admissions <60 months old), before and after June 2013; season-adjusted IRR  
245 1.01 (95%CI 0.51–2.00)  $P=0.97$  (**Supplementary Figure S1B**).

## 246 Inpatient deaths

247 Overall, 1,914/11,877 (16%) of YI died in hospital. The risk of inpatient death was not significantly  
248 different between 645/4,272 (15%) KHDSS residents and 1,269/7,605 (17%) non-residents of  
249 KHDSS (age- and sex-adjusted SHR 0.93 (95%CI 0.85–1.02)  $P=0.12$ ) (**Figure 1**). The annual YI  
250 inpatient case fatality ratio was stable (11% in 2009 and 13% in 2019. P-value for trend=0.80),  
251 **Figure 2**. Monthly inpatient case fatality for YI, 2 to 59 months old and all <60 months old children  
252 are shown in **Figure 3B**.

1  
2  
3 253 During the study period there were 3,119 inpatient deaths among admissions <60 months old  
4  
5  
6 254 admitted at KCH, with YI admissions accounting for 61% (95%CI 60–63%) of the deaths and no  
7  
8 255 significant linear trend from 2009 to 2019 (trend P=0.29). The mean monthly YI inpatient case  
9  
10 256 fatality was 16% (sd 0.86) and 16% (sd 1.23) before and after June 2013 respectively; season-  
11  
12  
13 257 adjusted IRR 0.77 (95%CI 0.39–1.52) P=0.45 **Figure 3C**. The mean monthly case fatality for all  
14  
15 258 admissions aged <60 months and admissions 2–59 months old did not differ before June 2013  
16  
17  
18 259 and after June 2013; season-adjusted IRR 0.79 (95%CI 0.39–1.58) P=0.50 and IRR 0.81 (95%CI  
19  
20 260 0.39–1.69) P=0.57 respectively **Supplementary Figure S1 C and D**.

21  
22  
23 261 Among the 4,421 KHDSS-resident YI admissions, median [IQR] time to death was 2 [1–4] days,  
24  
25  
26 262 while the survivors were admitted for 5 [3–8] days. A total of 423/645 (66%) deaths occurred  
27  
28 263 within the first 48 hours following admission. Forty-one YI left against medical advice, and 55  
29  
30  
31 264 were referred to other hospitals for further care.

#### 32 33 34 265 Admission diagnosis & case fatality ratio

35  
36  
37 266 The commonest reasons for hospital admission were neonatal sepsis (47%), preterm  
38  
39 267 complications (20%) and birth asphyxia (16%) accounting for 83% of all YI admissions (**Table 2**).  
40  
41  
42 268 The case fatality ratios for YI with respiratory distress syndrome, preterm complications and birth  
43  
44 269 asphyxia were 52%, 29% and 28% respectively (**Table 2**).

45  
46  
47 270

48  
49 271

50  
51 272

52  
53 273

54  
55 274

275 **Table 2. Discharge diagnosis assigned by clinician.**

| 276 | Discharge diagnosis <sup>a</sup>  | No. (%)                                      |                             |
|-----|-----------------------------------|----------------------------------------------|-----------------------------|
|     |                                   | Diagnosis assigned by clinician at discharge |                             |
| 277 |                                   | All admissions<br>(N=4421)                   | Inpatient Deaths<br>(N=645) |
| 278 | Neonatal sepsis                   | 2097 (47)                                    | 201 (9.6)                   |
| 279 | Preterm complications             | 889 (20)                                     | 262 (29)                    |
|     | Birth asphyxia                    | 724 (16)                                     | 201 (28)                    |
|     | Neonatal jaundice                 | 611 (14)                                     | 56 (9.2)                    |
| 280 | Lower respiratory tract infection | 486 (11)                                     | 41 (8.4)                    |
|     | Respiratory distress syndrome     | 263 (6.0)                                    | 136 (52)                    |
| 281 | Congenital anomalies              | 215 (4.9)                                    | 55 (26)                     |
|     | Meningitis <sup>b</sup>           | 112 (2.5)                                    | 11 (9.8)                    |
| 282 | Anaemia                           | 78 (1.8)                                     | 14 (18)                     |
|     | Malnutrition                      | 36 (0.8)                                     | 1 (2.8)                     |
| 283 | None specified                    | 69 (1.6)                                     | 4 (5.8)                     |
|     | Others                            | 266 (6.0) <sup>c</sup>                       | 13 (4.9)                    |

<sup>a</sup>Young infant could be assigned up to 2 diagnoses

<sup>b</sup>Meningitis: positive CSF culture, or positive CSF microscopy, or positive CSF antigen test, or elevated CSF WBC count ( $\geq 20$  in young infants aged 0-28 days OR,  $\geq 10$  in young infants aged 29-59 days) PLUS a positive blood culture for a known pathogen

<sup>c</sup>Accidents-3, Acute abdominal obstruction-15, bronchiolitis-12, burns-1, Candidiasis-1, Cellulitis abscess-21, Chickenpox-1, Chromosomal abnormality-5, CNS abscess-1, Conjunctivitis-2, Dehydration-2, Dental problems-1, Diabetes-1, Elective surgery-5, Encephalopathy-9, Epilepsy-7, Extra pulmonary TB-1, Febrile convulsions-5, Feeding difficulty-1, Gastroenteritis-15, Haemolytic uraemic syndrome-1, Hydrocephalus-11, LTB/croup-1, Immunosuppression-17, Malaria-2, Male genital problem-1, Meconium aspiration-33, Neonatal haemorrhage-14, Neonatal tetanus -10, Other skin disease-3, Otitis media-1, Poisoning (organophosphates)-1, Pyogenic arthritis-1, Rabies-1, Rash-4, renal failure-6, trauma/fractures/RTA-11, Urinary tract infection-10, upper respiratory tract infection (URTI)-24, Viral hepatitis-2, Viral infection-3.

## 287 Exposures associated with inpatient death

288 Variables assessed for association with inpatient death in univariate models are shown in

289 **Supplementary Table S3**. In the multivariable analysis (**Table 3**), admissions at age  $\leq 2$  days and

290 3–7 days, compared to  $\geq 28$  days old, were associated with inpatient deaths. Very low admission

291 weight ( $< 1.5$ kg) and weight 1.5-2.4kg compared to  $\geq 2.5$ kg were positively associated with

292 inpatient deaths. Signs of clinical severity (bradypnoea, tachypnoea, bradycardia, hypoxia, lower

293 chest wall indrawing, breathing difficulty, weak pulse, impaired consciousness and hypothermia,

294 but not fever), meningitis, bacteraemia, leucopenia and leucocytosis but not an HIV antibody

295 positive test (aSHR 1.15 (95%CI 0.81–1.63)) were positively associated with inpatient death. The  
 296 multivariable model bootstrapped AUC was 0.88 (95%CI 0.86–0.89) **Table 3**.

297 **Table 3. Multivariable regression analysis of factors associated with inpatient and post-**  
 298 **discharge mortality.**

|                                 | Inpatient analysis |         | Post-discharge analysis |         |
|---------------------------------|--------------------|---------|-------------------------|---------|
|                                 | Adjusted SHR*      | P-value | Adjusted HR             | P-value |
| <b>Demographics</b>             |                    |         |                         |         |
| Age in days                     |                    |         |                         |         |
| 0 to 2                          | 2.12 (1.46–3.06)   | <0.001  | 0.78 (0.50–1.21)        | 0.27    |
| 3 to 7                          | 3.88 (2.46–6.10)   | <0.001  | 0.57 (0.30–1.08)        | 0.08    |
| 8 to 28                         | 1.42 (0.90–2.25)   | 0.13    | 1.19 (0.73–1.93)        | 0.48    |
| >28                             | Reference          |         | Reference               |         |
| Sex (female)                    | 0.91 (0.78–1.07)   | 0.26    | 0.98 (0.74–1.31)        | 0.91    |
| Admission days (log)            | ¶                  |         | 1.93 (1.52–2.46)        | <0.001  |
| Type of discharge               |                    |         |                         |         |
| Normal                          | ¶                  |         | Reference               |         |
| Absconded                       | ¶                  |         | 2.73 (1.04–7.18)        | 0.04    |
| Transferred/referred            | ¶                  |         | 14.4 (9.22–22.6)        | <0.001  |
| <b>Anthropometry</b>            |                    |         |                         |         |
| Weight (kg)                     |                    |         |                         |         |
| <1.5                            | 2.16 (1.75–2.67)   | <0.001  | 2.01 (1.41–2.87)        | <0.001  |
| 1.5 to <2.5                     | 1.42 (1.16–1.74)   | 0.001   | 0.88 (0.47–1.65)        | 0.69    |
| ≥2.5                            | Reference          |         | Reference               |         |
| Missing weight                  | 3.85 (2.59–5.71)   | <0.001  | -                       |         |
| <b>Clinical features</b>        |                    |         |                         |         |
| Axillary temperature            |                    |         |                         |         |
| <36°C                           | 1.44 (1.17–1.78)   | 0.001   | 1.06 (0.72–1.57)        | 0.76    |
| 36 to 37.5°C                    | Reference          |         | Reference               |         |
| >37.5°C                         | 1.09 (0.84–1.41)   | 0.53    | 0.67 (0.46–0.99)        | 0.04    |
| Missing temperature             | 1.03 (0.38–2.75)   | 0.96    | 0.94 (0.09–9.30)        | 0.96    |
| Respiratory rate/min            |                    |         |                         |         |
| Bradypnoea                      | 1.45 (1.09–1.93)   | 0.01    | 1.72 (0.81–3.65)        | 0.16    |
| Normal                          | Reference          |         | Reference               |         |
| Tachypnoea                      | 0.80 (0.67–0.95)   | 0.01    | 1.33 (0.98–1.79)        | 0.07    |
| Missing                         | 1.51 (0.64–3.56)   | 0.34    | 0.82 (0.10–6.49)        | 0.85    |
| Heart rate/min                  |                    |         |                         |         |
| Bradycardia                     | 1.40 (1.08–1.82)   | 0.01    | ¶                       |         |
| Normal                          | Reference          |         |                         |         |
| Tachycardia                     | 1.14 (0.94–1.37)   | 0.18    | ¶                       |         |
| Missing                         | 0.41 (0.03–5.13)   | 0.49    | ¶                       |         |
| Hypoxia (SaO <sub>2</sub> <90%) | 1.62 (1.37–1.92)   | <0.001  | ¶                       |         |
| Capillary refill >2 seconds     | 1.34 (0.97–1.86)   | 0.08    | ¶                       |         |

|                                                                                                                                                                                                                                                                                                                                                                                                                                                                                                                                                                                                        |                  |        |                  |       |
|--------------------------------------------------------------------------------------------------------------------------------------------------------------------------------------------------------------------------------------------------------------------------------------------------------------------------------------------------------------------------------------------------------------------------------------------------------------------------------------------------------------------------------------------------------------------------------------------------------|------------------|--------|------------------|-------|
| Lower chest wall indrawing                                                                                                                                                                                                                                                                                                                                                                                                                                                                                                                                                                             | 1.41 (1.14–1.75) | 0.002  | ¶                |       |
| Stridor                                                                                                                                                                                                                                                                                                                                                                                                                                                                                                                                                                                                | 1.93 (0.92–4.03) | 0.08   | ¶                |       |
| Breathing difficulty                                                                                                                                                                                                                                                                                                                                                                                                                                                                                                                                                                                   | 1.45 (1.15–1.82) | 0.001  | ¶                |       |
| Weak pulse                                                                                                                                                                                                                                                                                                                                                                                                                                                                                                                                                                                             | 1.61 (1.19–2.17) | 0.002  | 2.33 (1.13–4.82) | 0.02  |
| Bulging fontanel                                                                                                                                                                                                                                                                                                                                                                                                                                                                                                                                                                                       | 2.45 (0.91–6.65) | 0.08   | 3.41 (1.49–7.79) | 0.004 |
| Impaired consciousness                                                                                                                                                                                                                                                                                                                                                                                                                                                                                                                                                                                 | 2.21 (1.72–2.84) | <0.001 | ¶                |       |
| Pallor                                                                                                                                                                                                                                                                                                                                                                                                                                                                                                                                                                                                 | 1.30 (0.98–1.71) | 0.07   | ¶                |       |
| <b>Laboratory features</b>                                                                                                                                                                                                                                                                                                                                                                                                                                                                                                                                                                             |                  |        |                  |       |
| Meningitis                                                                                                                                                                                                                                                                                                                                                                                                                                                                                                                                                                                             | 5.45 (2.50–11.8) | <0.001 | 2.21 (0.95–5.13) | 0.07  |
| HIV antibody positive                                                                                                                                                                                                                                                                                                                                                                                                                                                                                                                                                                                  | 1.15 (0.81–1.63) | 0.43   | 1.09 (0.50–2.35) | 0.83  |
| Bacteraemia                                                                                                                                                                                                                                                                                                                                                                                                                                                                                                                                                                                            | 2.21 (1.51–3.22) | <0.001 | ¶                |       |
| White blood cells (10 <sup>12</sup> cells/L)                                                                                                                                                                                                                                                                                                                                                                                                                                                                                                                                                           |                  |        |                  |       |
| <4                                                                                                                                                                                                                                                                                                                                                                                                                                                                                                                                                                                                     | 2.17 (1.30–3.62) | 0.003  | ¶                |       |
| 4-20                                                                                                                                                                                                                                                                                                                                                                                                                                                                                                                                                                                                   | Reference        |        | ¶                |       |
| >20                                                                                                                                                                                                                                                                                                                                                                                                                                                                                                                                                                                                    | 1.71 (1.43–2.04) | <0.001 | ¶                |       |
| unavailable                                                                                                                                                                                                                                                                                                                                                                                                                                                                                                                                                                                            | 1.09 (0.82–1.44) | 0.57   | ¶                |       |
| <b>Model performance</b>                                                                                                                                                                                                                                                                                                                                                                                                                                                                                                                                                                               |                  |        |                  |       |
| Bootstrapped AUC (95% CI)                                                                                                                                                                                                                                                                                                                                                                                                                                                                                                                                                                              | 0.88 (0.86–0.89) |        | 0.76 (0.72–0.79) |       |
| <p><b>SHR</b>; sub-distribution hazard ratios; *the SHR are from the Fine and Gray's proportional sub-hazards model, HR-Hazard ratio from the Proportional Cox regression model, ¶; variables not selected for inclusion in the multivariable model, AUC; area under receiver operating characteristics. Meningitis: positive CSF culture, or positive CSF microscopy, or positive CSF antigen test, or elevated CSF WBC count (<math>\geq 20</math> in young infants aged 0-28 days OR, <math>\geq 10</math> in young infants aged 29-59 days) PLUS a positive blood culture for a known pathogen</p> |                  |        |                  |       |

299

## 300 Post-discharge death

301 There were 3,776 live discharges from 3,640 YI residents of KHDSS, of which 3,760 (from 3,625  
302 individual YI) were followed up for 3,233 infant-years (**Figure 1**). During one-year follow-up, there  
303 were 208/3625 (5.7%) deaths: 64.3 (95%CI 56.2–73.7) deaths per 1,000 infant-years. The median  
304 [IQR] time to death after discharge was 35 [7–92] days. Of the 208 post-discharge deaths, 101  
305 (49%), 160 (77%), 179 (86%) and 193 (93%) occurred within 1, 3, 6 and 9 months after discharge  
306 respectively. The annual YI post-discharge case fatality was 5.4% in 2009 and 6.3% in 2019  
307 without evidence of linear trend (P-value for trend=0.77) (**Figure 2**).

1  
2  
3 308 One hundred and one (49%) of the 208 post-discharge deaths occurred at home without hospital  
4  
5  
6 309 readmission, 67 (32%) occurred during readmission to KCH and 40 (19%) occurred at other health  
7  
8 310 facilities. The five leading assigned causes of deaths for the 67 deaths at KCH were: neonatal  
9  
10 311 sepsis (24%), preterm complications (22%), congenital heart disease (15%), neonatal jaundice  
12  
13 312 (7.4%) and meningitis (7.4%) which were similar to index admission diagnosis **Supplementary**  
14  
15 313 **Table S7**. Causes of other deaths were unknown.

16  
17  
18 314 Overall, we observed 853 (20%) deaths among 4,272 individual YIs: 645 inpatient and 208 post-  
19  
20 315 discharge, hence 24% of deaths were post-discharge.

21  
22  
23  
24 316 Exposures assessed for association with post-discharge mortality are shown on **Table 3**. In the  
25  
26 317 multivariable Cox regression model, log days of hospital admission, leaving against advice, and  
27  
28 318 referral to more specialized hospital were positively associated with post-discharge mortality.  
29  
30 319 Other exposures associated with post-discharge mortality were low admission weight, fever,  
31  
32 320 weak pulse, and bulging fontanel, whilst a meningitis diagnosis at admission had borderline effect  
33  
34 321 (**Table 3**). The multivariable model bootstrapped AUC was 0.76 (95%CI 0.72–0.79).

#### 322 Subgroup analysis

323 In a subgroup analysis including 1,358 admissions of YIs born at KCH, their median [IQR]  
34  
35 324 gestational age was 38 (36–40) weeks and birth weight 2,778 (2,000–3,195) grams respectively.

36  
37  
38  
39 325 In the univariate regression model, born premature, born low birth weight and birth weight Z  
40  
41 326 score <-2 were positively associated with inpatient mortality (**Supplementary Table S8**). In the  
42  
43 327 multivariable model, low birth weight, admission age <8 days, bacteraemia and signs of clinical  
44  
45 328 severity were associated with inpatient mortality (**Supplementary Table S9**).



1  
2  
3  
4  
5  
6  
7  
8  
9  
10  
11  
12  
13  
14  
15  
16  
17  
18  
19  
20  
21  
22  
23  
24  
25  
26  
27  
28  
29  
30  
31  
32  
33  
34  
35  
36  
37  
38  
39  
40  
41  
42  
43  
44  
45  
46  
47  
48  
49  
50  
51  
52  
53  
54  
55  
56  
57  
58  
59  
60

329 Among the 1,142 YI followed up for 1,021 child-years of which 41/1,142 (3.6%) died, low birth  
330 weight (aHR 2.76 (95%CI 1.30–5.82)) was positively associated with post-discharge mortality in  
331 the multivariable model (**Supplementary Table S9**).

332

For peer review only

## 333 Discussion

### 334 Trends in admissions and proportions of young infants

335 During the study period, we observed a marked increase in YI admissions and proportion of YI  
336 among admissions in under-fives increased from around a fifth in 2009, to more than one-third  
337 in 2019. However, this did not seem to be associated with the introduction of free maternity care  
338 in 2013. Lack of observable effect may be due to challenges faced during policy implementation  
339 arising from inadequate expansion of quality health care facilities and resources. Several authors  
340 reported an increase in mothers attending Kenyan health facilities for antenatal care and  
341 delivery,(11, 21) however our results suggest this occurred in the context of a general trend which  
342 we previously observed during 1990-2008.(10)

343 Conversely, the number of admitted children older than 60 days decreased alongside a reduction  
344 in local malaria transmission,(22) introduction of routine childhood pneumococcal conjugate and  
345 rotavirus immunisation,(23) and expansion in numbers of health facilities in Kilifi County.(24)  
346 Variation in annual admissions over the years was due to multiple health workers' strikes.(13)  
347 During these periods, the general paediatric ward was closed and only the sickest children were  
348 admitted to the paediatric HDU due to limited staffing and bed capacity. The time series analysis  
349 indicated an increase in inpatient mortality during strikes (**Figure 3C**).

350 The leading diagnoses at admission in our analysis were neonatal sepsis, preterm complications,  
351 and birth asphyxia, similar to the period 1990–2008.(10) Over a third of admissions from KCH  
352 maternity were preterm and the hospital also received referrals of preterm and very low  
353 birthweight infants from sub-county hospitals and local health centres. There are few African

1  
2  
3 354 published datasets of neonatal or YI inpatient diagnoses; in a network of 7 Nigerian and Kenyan  
4  
5  
6 355 hospitals, prematurity accounted for over half (52%), and birth asphyxia almost a quarter (24%)  
7  
8 356 of neonatal admissions.(25) The leading bacterial isolates from blood cultures in our study  
9  
10 357 (*Klebsiella pneumoniae*, *Escherichia coli*, *Staphylococcus aureus*) were similar to those among YI  
11  
12  
13 358 in rural settings of Tanzania and Burkina Faso.(26) Kenya attained elimination status of maternal  
14  
15 359 and neonatal tetanus in 2018, following immunisation campaigns in high-risk regions.(27)  
16  
17  
18 360 Compared to 1990–2008,(10)neonatal tetanus was uncommon at our centre with only 10 cases  
19  
20 361 in 11 years.

#### 21 22 23 362 Inpatient deaths

24  
25  
26 363 The WHO has reported that in 2019, “47% of all under-5 deaths occurred in the newborn period  
27  
28  
29 364 with about one third dying on the day of birth and close to three quarters dying within the first  
30  
31 365 week of life”.(28) We found YI accounted for more than 60% of under-fives inpatient deaths,  
32  
33  
34 366 similar to a retrospective study of 16 Kenyan public hospitals in which neonatal deaths comprised  
35  
36 367 66% of inpatient paediatric deaths.(5) We found respiratory distress syndrome, birth asphyxia  
37  
38  
39 368 and preterm complications had the highest inpatient mortality. Improvements in peripartum care  
40  
41 369 of mothers and infants together with appropriate technology such as non-invasive ventilation for  
42  
43  
44 370 management of respiratory complications of preterm birth are priorities for reduction in  
45  
46 371 neonatal mortality in hospitals in LMICs.(5)

#### 47 48 49 372 Post-discharge deaths

50  
51  
52 373 Less than a quarter (24%) of all deaths during 1-year of follow up occurred post-discharge. This  
53  
54  
55 374 reflects a high inpatient (16%) case fatality rate with many very early inpatient deaths compared

1  
2  
3 375 to 6.6% in children aged  $\geq 60$  days.(7) Nevertheless, the post-discharge YI mortality rate (64.3 per  
4  
5  
6 376 1,000 child/years) was more than twice that of a cohort of children aged 2–59 months admitted  
7  
8 377 to KCH between 2007- 2015.(29) This reflects post-discharge mortality rates being highest in  
9  
10  
11 378 younger age groups, such as in Tanzania among under 1-year olds: 72 per 1,000 child/years  
12  
13 379 (95%CI. 67.2–77.2) falling to 6.9 (95%CI. 5.5–8.7) per 1,000 child/years in 4 to <5 year olds.(30)  
14  
15  
16 380 A greater proportion of YI post-discharge deaths occurred in hospital than among older  
17  
18 381 children,(7) implying that caregivers may be more likely to seek re-admission for YI or may live  
19  
20  
21 382 closer to KCH. About half of post-discharge deaths occurred within the first month, highlighting  
22  
23 383 the need for formal ‘down-referral’ for continuity of care after discharge in high risk YI.  
24  
25  
26 384 Analysis of exposures revealed that some were common for both inpatient and post-discharge  
27  
28 385 mortality: low admission weight, axillary temperature, and respiratory rate. Birth weight was  
29  
30  
31 386 not available for most YI but low admission weight <2.5kg was common (40%) in our  
32  
33  
34 387 participants. Of known causes of post-discharge deaths, leading ones were related to problems  
35  
36 388 in the early neonatal period. Meningitis was among the top 5 causes and bulging fontanel noted  
37  
38  
39 389 at admission was associated with increased risk of post-discharge death, suggesting that  
40  
41 390 current treatment guidelines may not be sufficiently effective.  
42  
43

#### 391 **Strengths and limitations of the study**

44  
45  
46  
47 392 Strengths of this study are large sample size, systematic collection of data and linkage to a well-  
48  
49 393 established demographic surveillance system, with few losses to follow up. Limitations are lack  
50  
51  
52 394 of accurate gestational age estimation and unknown birthweight of most participants. We did  
53  
54  
55 395 not have data collected at discharge, which may be of value in taking a risk-based approach to  
56  
57  
58  
59  
60

1  
2  
3 396 post-discharge care. This analysis is from a single hospital and outcomes in other settings with a  
4  
5  
6 397 different patient profile and facilities may vary.  
7

8  
9 398 **Conclusions**

10  
11  
12 399 Neonatal and YI admissions account for an increasing proportion of inpatient paediatric  
13  
14 400 admissions, and their mortality rate remains high. Mortality reduction will depend on  
15  
16  
17 401 improvements in antenatal, peripartum and postpartum care of mothers and infants, as well as  
18  
19 402 implementation of standardized neonatal care and paediatric protocols. Post-discharge mortality  
20  
21  
22 403 rates are higher, but account for a lower proportion of all deaths than among children age  $\geq 60$   
23  
24 404 days, likely because of the predominance of fatal conditions soon after birth with a  
25  
26 405 correspondingly substantial proportion of infant mortality occurring in the first week of life.  
27  
28

29  
30 406

31  
32 407

33  
34 408

35  
36 409

37  
38 410

39  
40 411

41  
42 412

43  
44 413

45  
46 414

47  
48 415

49  
50 416

51  
52 417

53  
54 418

55  
56 419

1  
2  
3 420 Acknowledgements  
4

5 421 We thank the parents, patients, and staff of Kilifi County Hospital and the KEMRI-Wellcome  
6  
7 422 Trust Research Programme for their participation in the study. This study is published with the  
8  
9  
10 423 permission of the Director, KEMRI. For the purpose of open access, the authors have applied a  
11  
12 424 CC BY public copyright license to any author-accepted manuscript version arising from this  
13  
14  
15 425 submission.  
16

17  
18 426 I, the Submitting Author has the right to grant and does grant on behalf of all authors of the Work (as  
19  
20 427 defined in the below author licence), an exclusive licence and/or a non-exclusive licence for  
21  
22 428 contributions from authors who are: i) UK Crown employees; ii) where BMJ has agreed a CC-BY licence  
23  
24 429 shall apply, and/or iii) in accordance with the terms applicable for US Federal Government officers or  
25  
26 430 employees acting as part of their official duties; on a worldwide, perpetual, irrevocable, royalty-free  
27  
28 431 basis to BMJ Publishing Group Ltd (“BMJ”) its licensees and where the relevant Journal is co-owned by  
29  
30 432 BMJ to the co-owners of the Journal, to publish the Work in BMJ Global Health and any other BMJ  
31  
32 433 products and to exploit all rights, as set out in our [licence](#).  
33  
34  
35  
36 434

37  
38 435 The Submitting Author accepts and understands that any supply made under these terms is made by  
39  
40 436 BMJ to the Submitting Author unless you are acting as an employee on behalf of your employer or a  
41  
42 437 postgraduate student of an affiliated institution which is paying any applicable article publishing charge  
43  
44 438 (“APC”) for Open Access articles. Where the Submitting Author wishes to make the Work available on an  
45  
46 439 Open Access basis (and intends to pay the relevant APC), the terms of reuse of such Open Access shall  
47  
48 440 be governed by a Creative Commons licence – details of these licences and which [Creative Commons](#)  
49  
50 441 licence will apply to this Work are set out in our licence referred to above.  
51  
52  
53

54 442  
55  
56  
57  
58  
59  
60

1  
2  
3 443 **Figures**  
4  
5

6 444 **Figure 1. Flow of study participants.**  
7  
8

9 445 **Figure 2. Annual proportion of YI admissions to all admissions <60 months, inpatient case**  
10  
11  
12 446 **fatality ratio (CFR) and post-discharge CFR.**  
13  
14

15 447 Proportions are plotted with 95% confidence intervals.  
16  
17

18 448 **Figure 3. A: Monthly hospital admissions (with predicted mean temporal trend), B: Monthly**  
19  
20  
21 449 **case fatality rates (with predicted mean temporal trend), C: Monthly young infant inpatient**  
22  
23 450 **case fatality before and after June 2013 and D: Monthly proportions of young infants to**  
24  
25 451 **admissions <60 months old.**  
26  
27

28 452  
29  
30  
31  
32 453  
33  
34

35 454 Ethics approval and consent to participate

36 455 Written consent was provided by the caregivers of all the surveillance study participants. Ethical  
37  
38  
39 456 approval to conduct this analysis was granted by the Kenya Medical Research Institute (KEMRI)  
40  
41  
42 457 National Ethics Review Committee (SCC 2778).  
43  
44

45 458 Consent for publication – not applicable  
46  
47

48 459 Availability of data and materials

49  
50 460 Data are available in a public, open access repository. Deidentified participant data and analysis  
51  
52 461 code have been deposited and may be requested at the Harvard Dataverse via this  
53

54  
55 462 link <https://doi.org/10.7910/DVN/OXJVFX>  
56  
57  
58  
59  
60

1  
2  
3 463 Competing interests  
4  
5

6 464 JAB declares the following: Chair of the DSMB for “**Efficacy and safety of whole-body chlorhexidine**  
7  
8 **cleansing in reducing bacterial skin colonisation of hospitalised neonates - a pilot trial**”. *St George’s,*  
9  
10 *University of London and global sites*; Treasurer of the Commonwealth Society for Paediatric  
11  
12 Gastroenterology & Nutrition Other authors declare they have no competing interests.  
13  
14  
15

16 468 Funding  
17

18 469 Authors NM, AN, NO, MO, and staffing, facilities, and resources were funded by the Wellcome  
19  
20 Trust (203077\_Z\_16\_Z). MM was supported by a Wellcome Trust International Intermediate  
21  
22 Fellowship (221997/Z/20/Z). JAB was supported by the Medical Research Council–Department  
23  
24 for International Development–Wellcome Trust Joint Global Health Trials scheme  
25  
26 (MR/M007367/1). JAB and MN were supported by the Bill & Melinda Gates Foundation  
27  
28 (OPP1131320). CWO was supported by the Drugs for Neglected Diseases initiative/Global  
29  
30 Antibiotic Research and Development Partnership (OXF-DND02). AT was supported by  
31  
32 Crosslinks.  
33  
34  
35  
36  
37

38 477 Role of the funding source  
39

40  
41 478 The funders did not have a role in study design, in the collection, analysis, and interpretation of  
42  
43 data, in writing the report, or in the decision to submit the paper for publication.  
44  
45  
46

47 480 Author contributions  
48

49 481 AT: Conceptualization, investigation, methodology, formal analysis, writing – original draft,  
50  
51 writing– review & editing; MN: Conceptualization, methodology, data curation, formal analysis,  
52  
53 visualisation , writing – original draft, writing– review & editing; CWO: Conceptualization,  
54  
55  
56  
57  
58  
59  
60



1  
2  
3 484 investigation, methodology, formal analysis, validation, writing – original draft, writing– review  
4  
5  
6 485 & editing; AN: Investigation, methodology, project administration, writing– review & editing;  
7  
8 486 MM: Conceptualization, methodology, writing– review & editing; NM: Investigation, project  
9  
10 487 administration, funding acquisition, resources, supervision, writing– review & editing; NO: Data  
11  
12  
13 488 curation, writing– review & editing, MO: Data curation, writing– review & editing; JAB:  
14  
15 489 Conceptualisation, investigation, methodology, funding acquisition, supervision, validation,  
16  
17  
18 490 writing– review & editing.  
19  
20  
21 491 AT and MN contributed equally to this paper. AT, the guarantor, accepts full responsibility for  
22  
23 492 the finished work and the conduct of the study, had access to the data, and controlled the  
24  
25  
26 493 decision to publish.  
27  
28  
29 494  
30  
31 495  
32  
33 496 **References**  
34  
35  
36 497  
37  
38 498 1. UNICEF . Levels & Trends in Child Mortality: Report 2020, Estimates developed by the United  
39  
40  
41 499 Nations Inter-agency Group for Child Mortality Estimation. New York: United Nations Children’s Fund;  
42  
43 500 2020.  
44  
45 501 2. Collaborators GBDCM. Global, regional, national, and selected subnational levels of stillbirths,  
46  
47 502 neonatal, infant, and under-5 mortality, 1980-2015: a systematic analysis for the Global Burden of  
48  
49 503 Disease Study 2015. *Lancet*. 2016;388(10053):1725-74 doi 10.1016/S0140-6736(16)31575-6.  
50  
51  
52 504 3. English M, Ngama M, Musumba C, et al. Causes and outcome of young infant admissions to a  
53  
54 505 Kenyan district hospital. *Arch Dis Child*. 2003;88(5):438-43 doi 10.1136/adc.88.5.438.  
55  
56  
57  
58  
59  
60

- 1  
2  
3 506 4. van den Boogaard W, Manzi M, Harries AD, et al. Causes of pediatric mortality and case-fatality  
4  
5 507 rates in eight Médecins Sans Frontières-supported hospitals in Africa. *Public Health Action*.  
6  
7 508 2012;2(4):117-21 doi 10.5588/pha.12.0038.
- 9  
10 509 5. Irimu G, Aluvaala J, Malla L, et al. Neonatal mortality in Kenyan hospitals: a multisite,  
11  
12 510 retrospective, cohort study. *BMJ Glob Health*. 2021;6(5) doi 10.1136/bmjgh-2020-004475.
- 13  
14 511 6. Obiero CW, Mturi N, Mwarumba S, et al. Clinical features to distinguish meningitis among young  
15  
16 512 infants at a rural Kenyan hospital. *Arch Dis Child*. 2021;106(2):130-6 doi 10.1136/archdischild-2020-  
17  
18 513 318913.
- 19  
20  
21 514 7. CHAIN Network. Childhood mortality during and after acute illness in Africa and south Asia: a  
22  
23 515 prospective cohort study. *Lancet Glob Health*. 2022;10(5):e673-e84 doi 10.1016/s2214-109x(22)00118-  
24  
25 516 8.
- 26  
27  
28 517 8. Nemetchek B, English L, Kissoon N, et al. Paediatric postdischarge mortality in developing  
29  
30 518 countries: a systematic review. *BMJ open*. 2018;8(12):e023445 doi 10.1136/bmjopen-2018-023445.
- 31  
32 519 9. Moisi JC, Gatakaa H, Berkley JA, et al. Excess child mortality after discharge from hospital in Kilifi,  
33  
34 520 Kenya: a retrospective cohort analysis. *Bull World Health Organ*. 2011;89(10):725-32, 32A doi  
35  
36 521 10.2471/BLT.11.089235.
- 37  
38  
39 522 10. Mwaniki MK, Gatakaa HW, Mturi FN, et al. An increase in the burden of neonatal admissions to  
40  
41 523 a rural district hospital in Kenya over 19 years. *BMC Public Health*. 2010;10:591 doi 10.1186/1471-2458-  
42  
43 524 10-591.
- 44  
45 525 11. Lang'at E, Mwanri L, Temmerman M. Effects of implementing free maternity service policy in  
46  
47 526 Kenya: an interrupted time series analysis. *BMC Health Serv Res*. 2019;19(1):645 doi 10.1186/s12913-  
48  
49 527 019-4462-x.
- 50  
51  
52  
53  
54  
55  
56  
57  
58  
59  
60

- 1  
2  
3 528 12. KEMRI-Wellcome Trust Research Programme. Health-research-linked-to-a-demographic-  
4  
5 529 surveillance-system [Available from: [https://kemri-wellcome.org/programme/health-research-linked-  
8  
9  
10 531 13. Ong'ayo G, Ooko M, Wang'ondur R, et al. Effect of strikes by health workers on mortality  
11  
12 532 between 2010 and 2016 in Kilifi, Kenya: a population-based cohort analysis. \*Lancet Glob Health\*.  
13  
14 533 2019;7\(7\):e961-e7 doi 10.1016/s2214-109x\(19\)30188-3.  
15  
16 534 14. Berkley JA, Lowe BS, Mwangi I, et al. Bacteremia among children admitted to a rural hospital in  
17  
18 535 Kenya. \*N Engl J Med\*. 2005;352\(1\):39-47 doi 10.1056/NEJMoa040275.  
19  
20  
21 536 15. Ministry of Health, Kenya. Basic Paediatric Protocols 4th ed2016.  
22  
23 537 16. \[dataset\] Ngari M, Talbert A, Ouma N, et al. Replication Data for: Inpatient and post-discharge  
24  
25 538 mortality among young infants admitted to a rural Kenyan hospital. Harvard Dataverse. 2022. Available  
26  
27 539 from: <https://doi.org/10.7910/DVN/OXJVFX>.  
28  
29  
30 540 17. Cuzick J. A Wilcoxon-type test for trend. \*Stat Med\*. 1985;4\(1\):87-90 doi  
31  
32 541 10.1002/sim.4780040112.  
33  
34 542 18. Fine JP, Gray RJ. A Proportional Hazards Model for the Subdistribution of a Competing Risk. \*J Am\*  
35  
36 543 \*Stat Assoc\*. 1999;94\(446\):496-509 doi 10.1080/01621459.1999.10474144.  
37  
38  
39 544 19. Seale AC, Barsosio HC, Koech AC, et al. Embedding surveillance into clinical care to detect  
40  
41 545 serious adverse events in pregnancy. \*Vaccine\*. 2015;33\(47\):6466-8 doi 10.1016/j.vaccine.2015.07.086.  
42  
43 546 20. Papageorghiou AT, Kennedy SH, Salomon LJ, et al. The INTERGROWTH-21\(st\) fetal growth  
44  
45 547 standards: toward the global integration of pregnancy and pediatric care. \*Am J Obstet Gynecol\*.  
46  
47 548 2018;218\(2S\):S630-S40 doi 10.1016/j.ajog.2018.01.011.  
48  
49  
50 549 21. Orangi S, Kairu A, Malla L, et al. Impact of free maternity policies in Kenya: an interrupted time-  
51  
52 550 series analysis. \*BMJ Glob Health\*. 2021;6\(6\) doi 10.1136/bmjgh-2020-003649.  
53  
54  
55  
56  
57  
58  
59  
60](https://kemri-wellcome.org/programme/health-research-linked-<br/>6<br/>7 530 to-a-demographic-surveillance-system/)

- 1  
2  
3 551 22. Njuguna P, Maitland K, Nyaguara A, et al. Observational study: 27 years of severe malaria  
4  
5 552 surveillance in Kilifi, Kenya. *BMC Med.* 2019;17(1):124 doi 10.1186/s12916-019-1359-9.  
6  
7 553 23. Hammitt LL, Etyang AO, Morpeth SC, et al. Effect of ten-valent pneumococcal conjugate vaccine  
8  
9 554 on invasive pneumococcal disease and nasopharyngeal carriage in Kenya: a longitudinal surveillance  
10  
11 555 study. *Lancet (London, England).* 2019;393(10186):2146-54 doi 10.1016/s0140-6736(18)33005-8.  
12  
13  
14 556 24. Munywoki J, Kagwanja N, Chuma J, et al. Tracking health sector priority setting processes and  
15  
16 557 outcomes for human resources for health, five-years after political devolution: a county-level case study  
17  
18 558 in Kenya. *Int J Equity Health.* 2020;19(1):165 doi 10.1186/s12939-020-01284-3.  
19  
20  
21 559 25. Nabwera HM, Wang D, Tongo OO, et al. Burden of disease and risk factors for mortality amongst  
22  
23 560 hospitalized newborns in Nigeria and Kenya. *PLoS One.* 2021;16(1):e0244109 doi  
24  
25 561 10.1371/journal.pone.0244109.  
26  
27  
28 562 26. Mduma E, Halidou T, Kaboré B, et al. Etiology of severe invasive infections in young infants in  
29  
30 563 rural settings in sub-Saharan Africa. *PLoS One.* 2022;17(2):e0264322 doi 10.1371/journal.pone.0264322.  
31  
32 564 27. WHO Afro. Kenya now eliminates maternal and neonatal tetanus 2019 [Available from:  
33  
34 565 <https://www.afro.who.int/news/kenya-now-eliminates-maternal-and-neonatal-tetanus>[Accessed  
35  
36 566 February 2 2022].  
37  
38  
39 567 28. World Health Organization. Newborns: improving survival and well-being 2020 [Available from:  
40  
41 568 <https://www.who.int/news-room/fact-sheets/detail/newborns-reducing-mortality> [Accessed May 13  
42  
43 569 2022].  
44  
45  
46 570 29. Talbert A, Ngari M, Bauni E, et al. Mortality after inpatient treatment for diarrhea in children: a  
47  
48 571 cohort study. *BMC Med.* 2019;17(1):20 doi 10.1186/s12916-019-1258-0.  
49  
50 572 30. Mukasa O, Masanja H, DeSavigny D, et al. A cohort study of survival following discharge from  
51  
52 573 hospital in rural Tanzanian children using linked data of admissions with community-based demographic  
53  
54 574 surveillance. *Emerg Themes Epidemiol.* 2021;18(1):4 doi 10.1186/s12982-021-00094-4.  
55  
56  
57  
58  
59  
60

1  
2  
3  
4  
5  
6  
7  
8  
9  
10  
11  
12  
13  
14  
15  
16  
17  
18  
19  
20  
21  
22  
23  
24  
25  
26  
27  
28  
29  
30  
31  
32  
33  
34  
35  
36  
37  
38  
39  
40  
41  
42  
43  
44  
45  
46  
47  
48  
49  
50  
51  
52  
53  
54  
55  
56  
57  
58  
59  
60

575

For peer review only

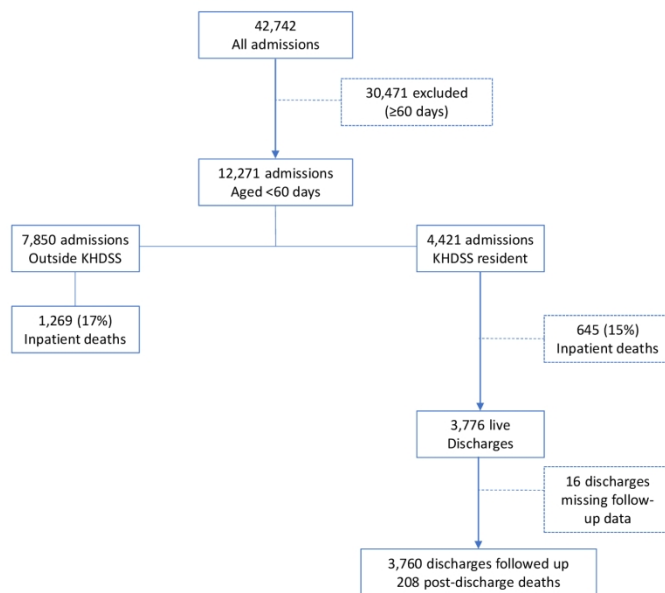

275x190mm (200 x 200 DPI)

1  
2  
3  
4  
5  
6  
7  
8  
9  
10  
11  
12  
13  
14  
15  
16  
17  
18  
19  
20  
21  
22  
23  
24  
25  
26  
27  
28  
29  
30  
31  
32  
33  
34  
35  
36  
37  
38  
39  
40  
41  
42  
43  
44  
45  
46  
47  
48  
49  
50  
51  
52  
53  
54  
55  
56  
57  
58  
59  
60

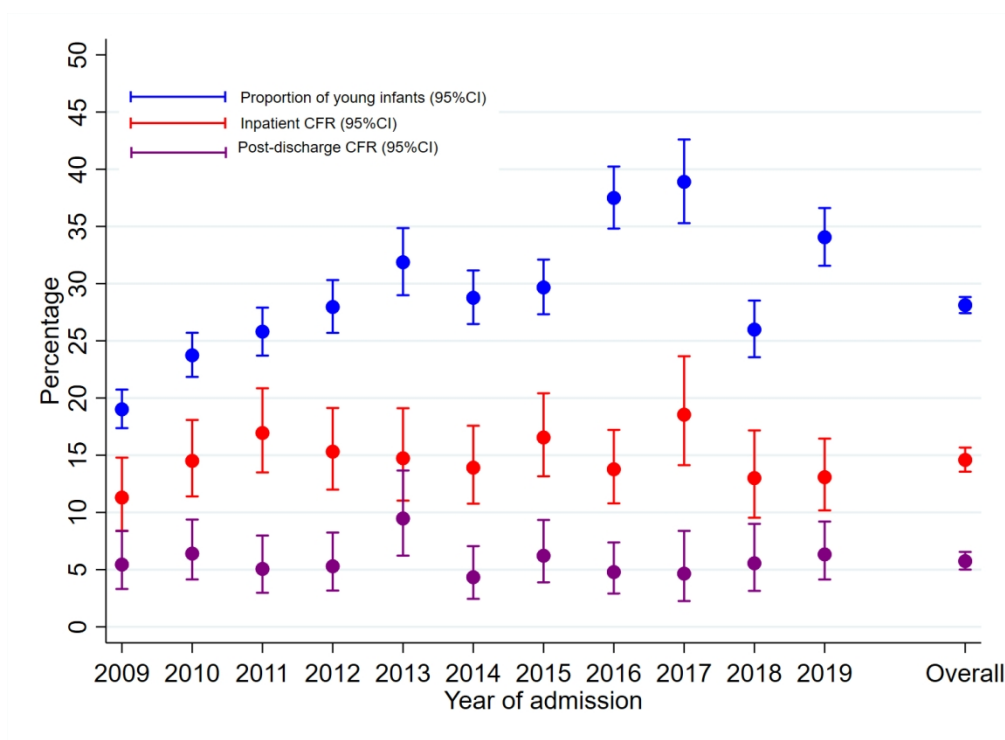

547x398mm (72 x 72 DPI)

1  
2  
3  
4  
5  
6  
7  
8  
9  
10  
11  
12  
13  
14  
15  
16  
17  
18  
19  
20  
21  
22  
23  
24  
25  
26  
27  
28  
29  
30  
31  
32  
33  
34  
35  
36  
37  
38  
39  
40  
41  
42  
43  
44  
45  
46  
47  
48  
49  
50  
51  
52  
53  
54  
55  
56  
57  
58  
59  
60

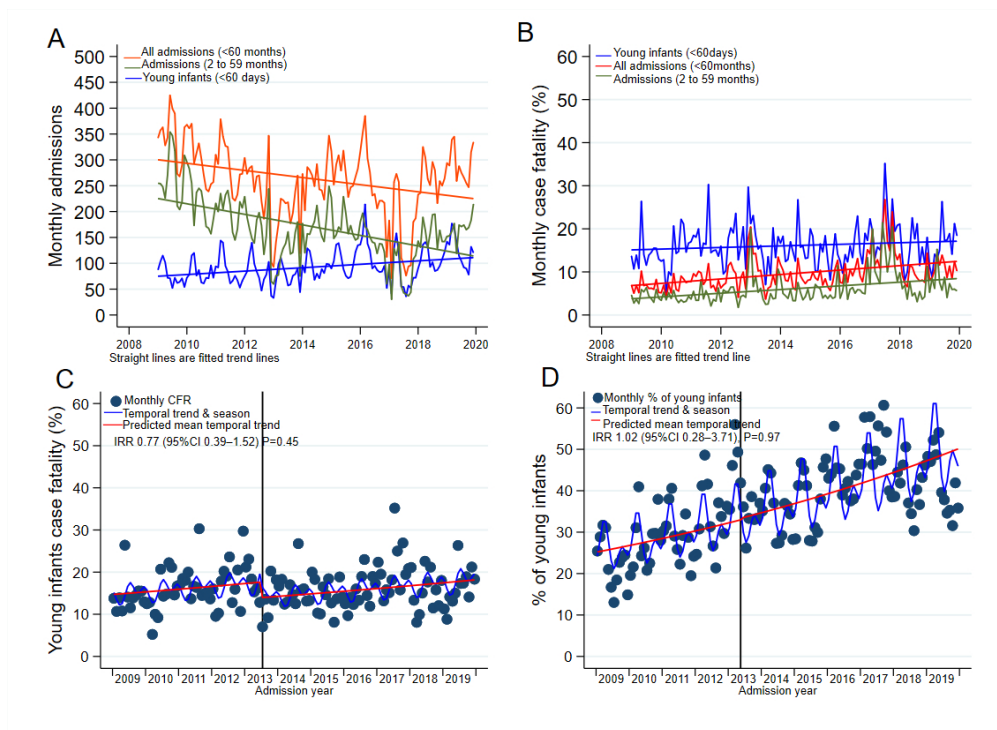

399x290mm (72 x 72 DPI)



1  
2  
3 **Supplementary materials**  
4

5 **Table of Contents**

|                                                                                                                                                                                                             |           |
|-------------------------------------------------------------------------------------------------------------------------------------------------------------------------------------------------------------|-----------|
| 6 Table S1. List of health workers strikes during study period.                                                                                                                                             | Page<br>2 |
| 7 Table S2. Proportion of missing data                                                                                                                                                                      | 2,3       |
| 8 Table S3. Univariate analysis of admission features associated with inpatient deaths.                                                                                                                     | 3, 4      |
| 9 Table S4. Univariate analysis of admission features associated with post-discharge deaths.                                                                                                                | 5,6       |
| 10 Table S5 Pathogens isolated from blood and CSF culture of young infants resident of KHDSS during inpatient period.                                                                                       | 7         |
| 11 Table S6. Annual admissions and case fatality ratios                                                                                                                                                     | 8         |
| 12 Table S7. Estimated causes of post-discharge deaths during readmission at KCH (67 deaths).                                                                                                               | 8         |
| 13 Table S8. Univariate analysis of admission features associated with inpatient deaths among babies born at KCH only.                                                                                      | 9,10      |
| 14 Table S9. Multivariable regression analysis of factors associated with inpatient and post-discharge mortality among children born at KCH only.                                                           | 11        |
| 15 Figure S1. A: Monthly all young infant admissions, B: all admissions (<60 months old), C: all admissions (<60 months old) case fatality and D: 2–59 months old case fatality before and after July 2013. | 12        |

16  
17  
18  
19  
20  
21  
22  
23  
24  
25  
26  
27  
28  
29  
30  
31  
32  
33  
34  
35  
36  
37  
38  
39  
40  
41  
42  
43  
44  
45  
46  
47  
48  
49  
50  
51  
52  
53  
54  
55  
56  
57  
58  
59  
60

Table S1. List of health workers strikes during study period.

| Strike dates                       | Health workers on strike | Duration of strike in days |
|------------------------------------|--------------------------|----------------------------|
| 5 to 13 December 2011              | Doctors                  | 9                          |
| 1 to 15 March 2012                 | Nurses                   | 15                         |
| 13 September to 4 October 2012     | Doctors                  | 22                         |
| 3 December 2012 to 13 January 2013 | Nurses                   | 42                         |
| 16 January to 11 February 2013     | Nurses                   | 26                         |
| 10 to 23 December 2013             | Doctors & nurses         | 14                         |
| 5 to 14 December 2016              | Nurses                   | 11                         |
| 5 December 2016 to 15 March 2017   | Doctors                  | 102                        |
| 5 June to 2 November 2017          | Nurses                   | 150                        |

Table S2. Proportion of missing data

| <b>N=4,421</b>                    | N missing | % missing |
|-----------------------------------|-----------|-----------|
| <b>Demographics</b>               |           |           |
| Age in days                       | 0         |           |
| Sex (female)                      | 0         |           |
| BCG scar                          | 76        | 1.7       |
| Reported born premature           | 321       | 7.3       |
| Reported low birth weight         | 322       | 7.3       |
| <b>Anthropometry</b>              |           |           |
| Weight (kg)                       | 43        | 1.0       |
| MUAC (cm)                         | 126       | 2.9       |
| <b>Clinical features</b>          |           |           |
| Axillary temperature              | 34        | 0.8       |
| Tachypnea                         | 208       | 4.7       |
| Tachycardia                       | 43        | 1.0       |
| Hypoxia (SaO <sub>2</sub> <90%)   | 20        | 0.5       |
| Lower chest wall indrawing        | 68        | 1.5       |
| Wheeze                            | 69        | 1.6       |
| Stridor                           | 71        | 1.6       |
| Breathing difficulty              | 64        | 1.5       |
| Cyanosis                          | 70        | 1.6       |
| Capillary refill $\geq 2$ seconds | 34        | 0.8       |
| Temperature gradient              | 81        | 1.8       |
| Weak pulse                        | 71        | 1.6       |
| Lethargy                          | 70        | 1.6       |
| Impaired consciousness            | 70        | 1.6       |
| Bulging fontanel                  | 72        | 1.6       |
| Stiff neck                        | 71        | 1.6       |
| Convulsions                       | 64        | 1.5       |
| Sunken eyes                       | 73        | 1.7       |
| Reduced skin turgor               | 71        | 1.6       |
| Pallor                            | 70        | 1.6       |
| <b>Laboratory features</b>        |           |           |
| HIV antibody positive             | 756       | 17        |
| Malaria slide positive            | 372       | 8.4       |
| Bacteraemia                       | 2281      | 52        |

|                         |      |    |
|-------------------------|------|----|
| Haemoglobin             | 448  | 10 |
| WBC                     | 449  | 10 |
| Platelets               | 448  | 10 |
| Blood glucose (mmols/L) | 1433 | 32 |

Table S3. Univariate analysis of admission features associated with inpatient deaths.

| <b>N=4,421</b>             | <b>Deaths<br/>(N=645)<br/>N (%)</b> | <b>Crude SHR</b> | <b>P-value</b> | <b>Scaled<br/>Schoenfeld<br/>residuals<br/>P-value</b> |
|----------------------------|-------------------------------------|------------------|----------------|--------------------------------------------------------|
| <b>Demographics</b>        |                                     |                  |                |                                                        |
| Age in days                |                                     |                  |                |                                                        |
| 0 to 2                     | 511 (19)                            | 3.31 (2.39–4.58) | <0.001         | 0.14                                                   |
| 3 to 7                     | 56 (12)                             | 2.07 (1.38–3.11) | <0.001         |                                                        |
| 8 to 28                    | 40 (6.8)                            | 1.15 (0.74–1.78) | 0.54           |                                                        |
| >28                        | 38 (6.0)                            | Reference        |                |                                                        |
| Sex (female)               | 268 (14)                            | 0.99 (0.91–1.09) | 0.93           | 0.77                                                   |
| Reported born premature    | 294 (29)                            | 2.53 (2.32–3.77) | <0.001         | 0.06                                                   |
| Reported low birth weight  | 222 (38)                            | 3.25 (2.97–3.56) | <0.001         | 0.18                                                   |
| <b>Anthropometry</b>       |                                     |                  |                |                                                        |
| Weight (kg)                |                                     |                  |                |                                                        |
| <1.5                       | 213 (38)                            | 4.95 (4.13–5.93) | <0.001         | 0.09                                                   |
| 1.5 to <2.5                | 174 (15)                            | 1.86(1.53–2.26)  | <0.001         |                                                        |
| ≥2.5                       | 229 (8.5)                           | Reference        |                |                                                        |
| Missing weight             | 29 (67)                             | 10.7 (7.60–14.9) | <0.001         |                                                        |
| MUAC (cm)                  |                                     |                  |                |                                                        |
| <9.0                       | 333 (25)                            | 3.57 (3.07–4.15) | <0.001         | 0.08                                                   |
| 9 to 10                    | 106 (12)                            | 1.73 (1.45–2.07) | <0.001         |                                                        |
| 10 to 11                   | 96 (9.3)                            | 1.48 (1.24–1.77) | <0.001         |                                                        |
| ≥11                        | 75 (7.1)                            | Reference        |                |                                                        |
| Missing MUAC               | 35 (28)                             | 3.89 (3.02–5.00) | <0.001         |                                                        |
| <b>Clinical features</b>   |                                     |                  |                |                                                        |
| Axillary temperature       |                                     |                  |                |                                                        |
| <36°C                      | 390 (29)                            | 3.13 (2.82–3.47) | <0.001         | 0.34                                                   |
| 36 to 37.5°C               | 159 (9.3)                           | Reference        |                |                                                        |
| >37.5°C                    | 84 (6.3)                            | 0.77 (0.67–0.88) | <0.001         |                                                        |
| Missing temperature        | 12 (35)                             | 3.78 (2.65–5.39) | <0.001         |                                                        |
| Respiratory rate/min       |                                     |                  |                |                                                        |
| Bradypnoea                 | 108 (57)                            | 6.09 (4.98–7.46) | <0.001         | 0.71                                                   |
| Normal                     | 329 (12)                            | Reference        |                |                                                        |
| Tachypnoea                 | 197 (13)                            | 1.07 (0.90–1.27) | 0.45           |                                                        |
| Missing                    | 11 (11)                             | 0.91 (0.51–1.65) | 0.76           |                                                        |
| Heart rate/min             |                                     |                  |                |                                                        |
| Bradycardia                | 74 (47)                             | 4.05 (3.21–5.11) | <0.001         | 0.50                                                   |
| Normal                     | 403 (14)                            | Reference        |                |                                                        |
| Tachycardia                | 163 (12)                            | 0.88 (0.73–1.05) | 0.15           |                                                        |
| Missing                    | 5 (23)                              | 1.68 (0.72–3.93) | 0.23           |                                                        |
| Hypoxia (SaO2 <90%)        | 309 (33)                            | 3.91 (3.58–4.26) | <0.001         | 0.48                                                   |
| Lower chest wall indrawing | 448 (22)                            | 2.86 (2.60–3.15) | <0.001         | 0.41                                                   |

|    |                                                                                                           |          |                  |        |      |
|----|-----------------------------------------------------------------------------------------------------------|----------|------------------|--------|------|
| 1  | Wheeze                                                                                                    | 0        | -                |        |      |
| 2  | Stridor                                                                                                   | 6 (32)   | 1.48 (0.89–2.47) | 0.13   | 0.23 |
| 3  | Breathing difficulty                                                                                      | 481 (22) | 3.62 (3.26–4.02) | <0.001 | 0.28 |
| 4  | Cyanosis                                                                                                  | 98 (47)  | 4.01 (3.55–4.53) | <0.001 | 0.14 |
| 5  | Capillary refill >2 seconds                                                                               | 61 (58)  | 5.61 (4.41–7.14) | <0.001 | 0.54 |
| 6  | Temperature gradient                                                                                      | 98 (38)  | 2.85 (2.51–3.23) | <0.001 | 0.36 |
| 7  | Weak pulse                                                                                                | 108 (69) | 5.85 (5.21–6.57) | <0.001 | 0.71 |
| 8  | Lethargy                                                                                                  | 64 (20)  | 1.20 (1.04–1.40) | 0.02   | 0.34 |
| 9  | Impaired consciousness                                                                                    | 140 (56) | 5.43 (4.91–6.00) | <0.001 | 0.42 |
| 10 | Bulging fontanel                                                                                          | 6 (19)   | 1.34 (0.90–1.99) | 0.15   | 0.08 |
| 11 | Stiff neck                                                                                                | 4 (40)   | 2.08 (1.30–3.32) | 0.002  | 0.17 |
| 12 | Convulsions                                                                                               | 16 (8.1) | 0.75 (0.61–0.93) | 0.01   | 0.53 |
| 13 | Sunken eyes                                                                                               | 5 (11)   | 1.04 (0.69–1.56) | 0.85   | 0.52 |
| 14 | Reduced skin turgor                                                                                       | 21 (22)  | 1.18 (0.91–1.52) | 0.22   | 0.56 |
| 15 | Pallor                                                                                                    | 72 (33)  | 2.47 (2.15–2.83) | <0.001 | 0.63 |
| 16 | <b>Laboratory features</b>                                                                                |          |                  |        |      |
| 17 | Meningitis                                                                                                | 8 (24)   | 8.06 (3.96–16.4) | <0.001 | 0.13 |
| 18 | Anaemia (haemoglobin <11 g/dl)                                                                            | 50 (11)  | 0.67 (0.51–0.90) | 0.007  | 0.51 |
| 19 | HIV antibody positive                                                                                     | 29 (20)  | 1.39 (1.13–1.71) | 0.002  | 0.28 |
| 20 | Malaria slide positive                                                                                    | 0        | -                |        |      |
| 21 | Bacteraemia                                                                                               | 63 (37)  | 2.92 (2.10–4.06) | <0.001 | 0.13 |
| 22 | Blood glucose (mmols/L)                                                                                   |          |                  |        |      |
| 23 | <2.6                                                                                                      | 137 (16) | 1.18 (1.04–1.33) | 0.009  | 0.42 |
| 24 | 2.6 to 7.0                                                                                                | 229 (12) | Reference        |        |      |
| 25 | >7.0                                                                                                      | 71 (31)  | 2.85 (2.47–3.29) | <0.001 |      |
| 26 | Missing blood glucose                                                                                     | 208 (15) | 1.18 (1.06–1.32) | 0.002  |      |
| 27 | White blood cells (10 <sup>12</sup> cells/L)                                                              |          |                  |        |      |
| 28 | <4                                                                                                        | 14 (26)  | 2.43 (1.47–4.03) | 0.001  | 0.70 |
| 29 | 4-20                                                                                                      | 362 (11) | Reference        |        |      |
| 30 | >20                                                                                                       | 210 (30) | 2.97 (2.52–3.50) | <0.001 |      |
| 31 | Missing                                                                                                   | 59 (13)  | 1.19 (0.91–1.57) | 0.20   |      |
| 32 | Platelets (10 <sup>9</sup> cells/L)                                                                       |          |                  |        |      |
| 33 | <150                                                                                                      | 139 (24) | 1.89 (1.57–2.27) | <0.001 | 0.10 |
| 34 | ≥150                                                                                                      | 447 (13) | Reference        |        |      |
| 35 | Missing                                                                                                   | 59 (13)  | 1.01 (0.77–1.32) | 0.95   |      |
| 36 | SHR: sub-distribution hazard ratios; the SHR are from the Fine and Gray's proportional sub-hazards model. |          |                  |        |      |
| 37 |                                                                                                           |          |                  |        |      |
| 38 |                                                                                                           |          |                  |        |      |
| 39 |                                                                                                           |          |                  |        |      |
| 40 |                                                                                                           |          |                  |        |      |
| 41 |                                                                                                           |          |                  |        |      |
| 42 |                                                                                                           |          |                  |        |      |
| 43 |                                                                                                           |          |                  |        |      |
| 44 |                                                                                                           |          |                  |        |      |
| 45 |                                                                                                           |          |                  |        |      |
| 46 |                                                                                                           |          |                  |        |      |
| 47 |                                                                                                           |          |                  |        |      |
| 48 |                                                                                                           |          |                  |        |      |
| 49 |                                                                                                           |          |                  |        |      |
| 50 |                                                                                                           |          |                  |        |      |
| 51 |                                                                                                           |          |                  |        |      |
| 52 |                                                                                                           |          |                  |        |      |
| 53 |                                                                                                           |          |                  |        |      |
| 54 |                                                                                                           |          |                  |        |      |
| 55 |                                                                                                           |          |                  |        |      |
| 56 |                                                                                                           |          |                  |        |      |
| 57 |                                                                                                           |          |                  |        |      |
| 58 |                                                                                                           |          |                  |        |      |
| 59 |                                                                                                           |          |                  |        |      |
| 60 |                                                                                                           |          |                  |        |      |

Table S4. Univariate analysis of admission features associated with post-discharge deaths.

| N=3625                                           | Deaths (N=208) | Crude HR         | P-value | Scaled Schoenfeld residuals P-value |
|--------------------------------------------------|----------------|------------------|---------|-------------------------------------|
| <b>Demographics</b>                              |                |                  |         |                                     |
| Age in days                                      |                |                  |         |                                     |
| 0 to 2                                           | 124 (5.6)      | 0.98 (0.67–1.44) | 0.92    | 0.10                                |
| 3 to 7                                           | 15 (3.7)       | 0.63 (0.34–1.16) | 0.14    |                                     |
| 8 to 28                                          | 36 (6.6)       | 1.17 (0.73–1.87) | 0.52    |                                     |
| >28                                              | 33 (5.5)       | Reference        |         |                                     |
| Sex (female)                                     | 89 (5.5)       | 0.98 (0.74–1.28) | 0.86    | 0.79                                |
| Reported born premature                          | 58 (8.0)       | 1.79 (1.32–2.44) | <0.001  | 0.07                                |
| Reported low birth weight                        | 33 (9.3)       | 1.99 (1.37–2.90) | <0.001  | 0.13                                |
| Length of hospitalization (days)-log transformed | -              | 1.96 (1.68–2.27) | <0.001  | 0.38                                |
| Discharged over weekend                          |                |                  |         |                                     |
| No                                               | 173 (5.7)      | Reference        |         |                                     |
| Yes                                              | 35 (4.8)       | 0.85 (0.59–1.23) | 0.39    | 0.16                                |
| Type of discharge                                |                |                  |         |                                     |
| Normal discharge                                 | 180 (4.9)      | Reference        |         | 0.75                                |
| Absconded                                        | 5 (12)         | 2.60 (1.07–6.33) | 0.04    |                                     |
| Transferred/referred                             | 23 (44)        | 11.8 (7.64–18.2) | <0.001  |                                     |
| <b>Anthropometry</b>                             |                |                  |         |                                     |
| Weight (kg)                                      |                |                  |         |                                     |
| <1.5                                             | 30 (8.5)       | 2.49 (1.65–3.77) | <0.001  | 0.17                                |
| 1.5 to <2.5                                      | 87 (9.2)       | 2.64 (1.97–3.54) | <0.001  |                                     |
| ≥2.5                                             | 91 (3.7)       | Reference        |         |                                     |
| Missing weight                                   | 0              | -                |         |                                     |
| MUAC (cm)                                        |                |                  |         |                                     |
| <9.0                                             | 88 (8.8)       | 4.05 (2.56–6.41) | <0.001  | 0.17                                |
| 9 to 10                                          | 44 (5.8)       | 2.56 (1.55–4.24) | <0.001  |                                     |
| 10 to 11                                         | 42 (4.5)       | 1.92 (1.15–3.18) | 0.01    |                                     |
| ≥11                                              | 23 (2.4)       | Reference        |         |                                     |
| Missing MUAC                                     | 11 (12)        | 5.83 (2.84–12.0) | <0.001  |                                     |
| <b>Clinical features</b>                         |                |                  |         |                                     |
| Axillary temperature                             |                |                  |         |                                     |
| <36°C                                            | 78 (8.1)       | 1.45 (1.07–1.96) | 0.02    | 0.80                                |
| 36 to 37.5°C                                     | 88 (5.7)       | Reference        |         |                                     |
| >37.5°C                                          | 41 (3.3)       | 0.57 (0.40–0.83) | 0.003   |                                     |
| Missing temperature                              | 1 (5.0)        | 0.99 (0.14–7.12) | 0.99    |                                     |
| Respiratory rate/min                             |                |                  |         |                                     |
| Bradypnoea                                       | 7 (8.8)        | 1.92 (0.90–4.13) | 0.09    | 0.30                                |
| Normal                                           | 108 (4.7)      | Reference        |         |                                     |
| Tachypnoea                                       | 87 (6.8)       | 1.44 (1.09–1.92) | 0.01    |                                     |
| Missing                                          | 6 (7.2)        | 1.65 (0.72–3.76) | 0.23    |                                     |
| Heart rate/min                                   |                |                  |         |                                     |
| Bradycardia                                      | 9 (11)         | 2.10 (1.07–4.13) | 0.03    | 0.73                                |
| Normal                                           | 137 (5.5)      | Reference        |         |                                     |
| Tachycardia                                      | 62 (5.3)       | 0.97 (0.72–1.31) | 0.85    |                                     |

|                                                                        |           |                  |       |      |
|------------------------------------------------------------------------|-----------|------------------|-------|------|
| Missing                                                                | 0         | -                |       |      |
| Hypoxia (SaO <sub>2</sub> <90%)                                        | 51 (8.2)  | 1.68 (1.23–2.31) | 0.001 | 0.54 |
| Lower chest wall indrawing                                             | 108 (6.8) | 1.54 (1.17–2.02) | 0.002 | 0.18 |
| Wheeze                                                                 | 2 (4.4)   | 0.77 (0.19–3.10) | 0.71  | 0.20 |
| Stridor                                                                | 0         | -                |       |      |
| Breathing difficulty                                                   | 109 (6.5) | 1.40 (1.07–1.85) | 0.02  | 0.26 |
| Cyanosis                                                               | 7 (6.3)   | 1.14 (0.54–2.43) | 0.73  | 0.17 |
| Capillary refill ≥2 seconds                                            | 4 (9.4)   | 1.81 (0.67–4.87) | 0.24  | 0.40 |
| Temperature gradient                                                   | 12 (7.5)  | 1.44 (0.80–2.57) | 0.23  | 0.22 |
| Weak pulse                                                             | 7 (15)    | 3.10 (1.46–6.59) | 0.003 | 0.38 |
| Lethargy                                                               | 14 (5.8)  | 1.06 (0.63–1.80) | 0.82  | 0.19 |
| Impaired consciousness                                                 | 6 (5.5)   | 0.98 (0.44–2.21) | 0.96  | 0.50 |
| Bulging fontanel                                                       | 4 (15)    | 3.04 (1.13–8.18) | 0.03  | 0.06 |
| Stiff neck                                                             | 1 (17)    | 2.84 (0.40–20.2) | 0.30  | 0.15 |
| Convulsions                                                            | 9 (5.0)   | 0.88 (0.46–1.75) | 0.75  | 0.31 |
| Sunken eyes                                                            | 6 (15)    | 3.31 (1.47–7.45) | 0.004 | 0.20 |
| Reduced skin turgor                                                    | 8 (11)    | 2.19 (1.08–4.43) | 0.03  | 0.20 |
| Pallor                                                                 | 15 (10)   | 2.09 (1.23–3.53) | 0.006 | 0.23 |
| <b>Laboratory features</b>                                             |           |                  |       |      |
| Meningitis                                                             | 4 (16)    | 3.98 (1.45–10.9) | 0.007 | 0.13 |
| Anaemia (haemoglobin <11 g/dl)                                         | 26 (6.2)  | 1.19 (0.79–1.80) | 0.41  | 0.68 |
| HIV antibody positive                                                  | 7 (6.2)   | 1.17 (0.55–2.49) | 0.69  | 0.76 |
| Malaria slide positive                                                 | 0         | -                |       |      |
| Bacteraemia                                                            | 10 (9.4)  | 1.02 (0.50–2.06) | 0.96  | 0.28 |
| Blood glucose (mmols/L)                                                |           |                  |       |      |
| <2.6                                                                   | 51 (6.9)  | 1.31 (0.92–1.85) | 0.13  | 0.25 |
| 2.6 to 7.0                                                             | 86 (5.3)  | Reference        |       |      |
| >7.0                                                                   | 10 (6.3)  | 1.21 (0.63–2.32) | 0.57  |      |
| Missing blood glucose                                                  | 61 (5.0)  | 0.95 (0.68–1.32) | 0.75  |      |
| White blood cells (10 <sup>12</sup> cells/L)                           |           |                  |       |      |
| <4                                                                     | 1 (2.5)   | 0.45 (0.06–3.20) | 0.42  | 0.79 |
| 4–20                                                                   | 157 (5.5) | Reference        |       |      |
| >20                                                                    | 29 (6.1)  | 1.10 (0.74–1.64) | 0.63  |      |
| Missing                                                                | 21 (5.4)  | 0.99 (0.63–1.56) | 0.97  |      |
| Platelets (10 <sup>9</sup> cells/L)                                    |           |                  |       |      |
| <150                                                                   | 38 (8.6)  | 1.69 (1.18–2.41) | 0.004 | 0.70 |
| ≥150                                                                   | 149 (5.1) | Reference        |       |      |
| Missing                                                                | 21 (5.4)  | 1.08 (0.68–1.70) | 0.75  |      |
| HR: hazard ratios; the HR are from the Cox proportional hazards model. |           |                  |       |      |

Table S5 Pathogens isolated from blood and CSF culture of young infants resident of KHDSS during inpatient period.

| Blood culture Isolates                       |         | CSF culture isolates             |         |
|----------------------------------------------|---------|----------------------------------|---------|
| Pathogen full names (N=178)                  | No. (%) | Pathogen full names (N=24)       | No. (%) |
| <i>Klebsiella pneumoniae</i>                 | 53 (30) | <i>Escherichia coli</i>          | 6 (25)  |
| <i>Escherichia coli</i>                      | 25 (14) | Group B Streptococcus            | 6 (25)  |
| <i>Staphylococcus aureus</i>                 | 22 (12) | <i>Klebsiella pneumoniae</i>     | 3 (13)  |
| Group B Streptococcus                        | 19 (11) | <i>Streptococcus pneumoniae</i>  | 3 (13)  |
| Non-typhoidal Salmonella species             | 9 (5.1) | <i>Enterobacter cloacae</i>      | 3 (13)  |
| <i>Enterobacter cloacae</i>                  | 8 (4.5) | Non-typhoidal Salmonella species | 2 (8.2) |
| <i>Pseudomonas aeruginosa</i>                | 6 (3.4) | <i>Acinetobacter lwoffii</i>     | 1 (4.2) |
| <i>Streptococcus pneumoniae</i>              | 5 (2.8) |                                  |         |
| <i>Streptococcus pyogenes</i>                | 3 (1.7) |                                  |         |
| Acinetobacter species                        | 3 (1.7) |                                  |         |
| <i>Aeromonas hydrophila</i>                  | 3 (1.7) |                                  |         |
| Group A Streptococcus                        | 3 (1.7) |                                  |         |
| <i>Serratia marcescens</i>                   | 2 (1.1) |                                  |         |
| <i>Acinetobacter calcoaceticus/baumannii</i> | 2 (1.1) |                                  |         |
| <i>Acinetobacter lwoffii</i>                 | 1 (0.6) |                                  |         |
| <i>Aeromonas sobria</i>                      | 1 (0.6) |                                  |         |
| <i>Chryseobacterium indologenes</i>          | 1 (0.6) |                                  |         |
| <i>Enterobacter aerogenes</i>                | 1 (0.6) |                                  |         |
| Enterococci species                          | 1 (0.6) |                                  |         |
| <i>Haemophilus influenzae</i>                | 1 (0.6) |                                  |         |
| <i>Proteus mirabilis</i>                     | 1 (0.6) |                                  |         |

CSF; cerebrospinal fluid, Out of the 33 Meningitis cases, only the 24 presented had positive CSF culture.

Table S6. Annual admissions and case fatality ratios (CFR).

| Admissions/Year                 | 2009 | 2010 | 2011 | 2012 | 2013 | 2014 | 2015 | 2016 | 2017 | 2018 | 2019 |
|---------------------------------|------|------|------|------|------|------|------|------|------|------|------|
| <60 days                        | 407  | 455  | 425  | 418  | 319  | 424  | 429  | 472  | 275  | 323  | 474  |
| 2 to 59 months                  | 1734 | 1462 | 1222 | 1177 | 682  | 1050 | 1017 | 787  | 432  | 920  | 918  |
| Proportion of YI admissions     | 19%  | 24%  | 26%  | 28%  | 32%  | 29%  | 30%  | 37%  | 39%  | 26%  | 34%  |
| YI inpatient deaths             | 46   | 66   | 72   | 64   | 47   | 59   | 71   | 65   | 51   | 42   | 62   |
| YI inpatient CFR                | 11%  | 15%  | 17%  | 15%  | 15%  | 14%  | 17%  | 14%  | 19%  | 13%  | 13%  |
| YI post-discharge 1-year deaths | 19   | 24   | 17   | 18   | 25   | 15   | 21   | 19   | 10   | 15   | 25   |
| YI Post-discharge 1- year CFR   | 5.4% | 6.4% | 5.1% | 5.3% | 9.5% | 4.3% | 6.2% | 4.8% | 4.7% | 5.6% | 6.3% |

Table S7. Estimated causes of post-discharge deaths during readmission at KCH (67 deaths).

| Index admission diagnosis (N=67)  | No. (%) | Causes of post-discharge deaths (N=67) | No. (%) |
|-----------------------------------|---------|----------------------------------------|---------|
| Neonatal sepsis                   | 15 (22) | Neonatal sepsis                        | 16 (24) |
| Preterm complications             | 15 (22) | Preterm complications                  | 15 (22) |
| Heart disease-Congenital          | 9 (13)  | Heart disease-Congenital               | 10 (15) |
| Neonatal jaundice                 | 5 (7.5) | Neonatal jaundice                      | 5 (7.4) |
| Meningitis                        | 4 (6.0) | Meningitis                             | 5 (7.4) |
| Birth asphyxia                    | 4 (6.0) | Birth asphyxia                         | 5 (7.4) |
| Lower respiratory tract infection | 4 (6.0) | Lower respiratory tract infection      | 4 (6.0) |
| Encephalopathy - unknown          | 0       | Encephalopathy - unknown               | 1 (1.5) |
| Hydrocephalus                     | 1 (1.5) | Hydrocephalus                          | 1 (1.5) |
| Malnutrition                      | 1 (1.5) | None specified                         | 5 (7.4) |
| None specified                    | 9 (13)  |                                        |         |

Index admission diagnosis and causes of death were assigned by treating clinician.



Table S8. Univariate analysis of admission features associated with inpatient deaths among babies born at KCH only.

| N=1,358                  | Deaths<br>(N=174)<br>N (%) | Crude SHR        | P-value | Scaled<br>Schoenfeld<br>residuals P-<br>value |
|--------------------------|----------------------------|------------------|---------|-----------------------------------------------|
| <b>Demographics</b>      |                            |                  |         |                                               |
| Age in days              |                            |                  |         |                                               |
| 0 to 2                   | 151 (15)                   | 2.48 (1.19–5.16) | 0.02    | 0.26                                          |
| 3 to 7                   | 8 (7.0)                    | 1.22 (0.45–3.30) | 0.69    |                                               |
| 8 to 28                  | 8 (6.8)                    | 1.21 (0.46–3.23) | 0.70    |                                               |
| >28                      | 7 (5.5)                    | Reference        |         |                                               |
| Sex (female)             | 84 (14)                    | 1.11 (0.83–1.48) | 0.50    | 0.31                                          |
| Born premature           | 101 (21)                   | 2.65 (1.97–3.56) | <0.001  | 0.10                                          |
| Born low birth weight    | 107 (21)                   | 2.74 (2.03–3.71) | <0.001  | 0.44                                          |
| <b>Anthropometry</b>     |                            |                  |         |                                               |
| Weight z score at birth  |                            |                  |         |                                               |
| <-2.0                    | 32 (17)                    | 1.49 (1.02–2.17) | 0.04    | 0.12                                          |
| ≥-2.0                    | 142 (12)                   | Reference        |         |                                               |
| MUAC (cm)                |                            |                  |         |                                               |
| <9.0                     | 97 (23)                    | 3.14 (2.05–4.83) | <0.001  | 0.17                                          |
| 9 to 10                  | 26 (9.9)                   | 1.26 (0.74–2.17) | 0.40    |                                               |
| 10 to 11                 | 25 (7.3)                   | 0.91 (0.53–1.57) | 0.73    |                                               |
| ≥11                      | 26 (7.9)                   | Reference        |         |                                               |
| Missing MUAC             | 0                          | -                |         |                                               |
| <b>Clinical features</b> |                            |                  |         |                                               |
| Axillary temperature     |                            |                  |         |                                               |
| <36°C                    | 113 (26)                   | 3.02 (2.13–4.27) | <0.001  | 0.30                                          |
| 36 to 37.5°C             | 41 (9.2)                   | Reference        |         |                                               |
| >37.5°C                  | 18 (3.9)                   | 0.42 (0.24–0.72) | 0.002   |                                               |
| Missing temperature      | 2 (50)                     | 6.90 (1.84–25.8) | 0.004   |                                               |
| Respiratory rate/min     |                            |                  |         |                                               |
| Bradypnoea               | 32 (52)                    | 6.44 (4.39–9.45) | <0.001  | 0.17                                          |
| Normal                   | 91 (10)                    | Reference        |         |                                               |
| Tachypnoea               | 50 (12)                    | 1.21 (0.86–1.69) | 0.28    |                                               |
| Missing                  | 1 (5.3)                    | 0.49 (0.07–3.37) | 0.47    |                                               |
| Heart rate/min           |                            |                  |         |                                               |
| Bradycardia              | 21 (43)                    | 4.76 (3.06–7.43) | <0.001  | 0.81                                          |
| Normal                   | 98 (10)                    | Reference        |         |                                               |
| Tachycardia              | 55 (15)                    | 1.48 (1.07–2.05) | 0.02    |                                               |

|                                                                                                           |          |                  |        |      |
|-----------------------------------------------------------------------------------------------------------|----------|------------------|--------|------|
| Missing                                                                                                   | 0        | -                |        |      |
| Hypoxia (SaO <sub>2</sub> <90%)                                                                           | 79 (29)  | 3.62 (2.71–4.83) | <0.001 | 0.81 |
| Lower chest wall indrawing                                                                                | 125 (21) | 3.57 (2.57–4.95) | <0.001 | 0.47 |
| Wheeze                                                                                                    | 0        | -                |        |      |
| Stridor                                                                                                   | 5 (63)   | 6.96 (3.09–15.7) | <0.001 | 0.60 |
| Breathing difficulty                                                                                      | 481 (22) | 5.40 (3.69–7.88) | <0.001 | 0.18 |
| Cyanosis                                                                                                  | 29 (48)  | 5.15 (3.54–7.50) | <0.001 | 0.18 |
| Capillary refill >2 seconds                                                                               | 14 (64)  | 7.22 (4.43–11.7) | <0.001 | 0.58 |
| Temperature gradient                                                                                      | 26 (30)  | 2.69 (1.81–4.01) | <0.001 | 0.49 |
| Weak pulse                                                                                                | 25 (58)  | 6.52 (4.44–9.56) | <0.001 | 0.77 |
| Lethargy                                                                                                  | 17 (16)  | 1.29 (0.79–2.10) | 0.31   | 0.56 |
| Impaired consciousness                                                                                    | 48 (52)  | 6.75 (4.93–9.24) | <0.001 | 0.13 |
| Bulging fontanel                                                                                          | 1 (25)   | 2.03 (0.31–13.2) | 0.46   | 0.59 |
| Stiff neck                                                                                                | 1 (5.3)  | -                |        | 0.31 |
| Convulsions                                                                                               | 1 (2.9)  | 0.21 (0.03–1.48) | 0.12   | 0.21 |
| Sunken eyes                                                                                               | 1 (17)   | 1.35 (0.19–9.77) | 0.77   | 0.57 |
| Reduced skin turgor                                                                                       | 1 (5.9)  | 0.44 (0.06–3.19) | 0.42   | 0.56 |
| Pallor                                                                                                    | 21 (42)  | 4.00 (2.61–6.12) | <0.001 | 0.59 |
| <b>Laboratory features</b>                                                                                |          |                  |        |      |
| Meningitis                                                                                                | 2 (29)   | 9.95 (2.37–41.8) | 0.002  | 0.12 |
| Haemoglobin <11 g/dl                                                                                      | 11 (13)  | 0.92 (0.51–1.66) | 0.78   | 0.25 |
| HIV antibody positive                                                                                     | 8 (21)   | 1.68 (0.84–3.33) | 0.14   | 0.14 |
| Malaria slide positive                                                                                    | 0        | -                |        |      |
| Bacteraemia                                                                                               | 14 (33)  | 3.00 (1.48–5.95) | 0.002  | 0.20 |
| Blood glucose (mmols/l)                                                                                   |          |                  |        |      |
| <2.6                                                                                                      | 33 (12)  | 1.02 (0.67–1.56) | 0.91   | 0.95 |
| 2.6 to 7.0                                                                                                | 58 (12)  | Reference        |        |      |
| >7.0                                                                                                      | 11 (21)  | 1.88 (1.00–3.54) | 0.05   |      |
| Missing blood glucose                                                                                     | 72 (13)  | 1.11 (0.79–1.56) | 0.53   |      |
| White blood cells (10 <sup>12</sup> cells/L)                                                              |          |                  |        |      |
| <4                                                                                                        | 3 (33)   | 3.52 (1.25–9.91) | 0.02   | 0.08 |
| 4-20                                                                                                      | 100 (10) | Reference        |        |      |
| >20                                                                                                       | 59 (28)  | 3.10 (2.27–4.24) | <0.001 |      |
| Missing                                                                                                   | 12 (8.2) | 0.82 (0.45–1.48) | 0.50   |      |
| Platelets (10 <sup>9</sup> cells/L)                                                                       |          |                  |        |      |
| <150                                                                                                      | 35 (20)  | 1.69 (1.18–2.44) | 0.005  | 0.50 |
| ≥150                                                                                                      | 127 (12) | Reference        |        |      |
| Missing                                                                                                   | 12 (8.2) | 0.66 (0.37–1.19) | 0.17   |      |
| SHR; sub-distribution hazard ratios; the SHR are from the Fine and Gray's proportional sub-hazards model. |          |                  |        |      |

Table S9. Multivariable regression analysis of factors associated with inpatient and post-discharge mortality among children born at KCH only.

|                                                                                                                                                                                                                                                                                               | Inpatient analysis |         | Post-discharge analysis |         |
|-----------------------------------------------------------------------------------------------------------------------------------------------------------------------------------------------------------------------------------------------------------------------------------------------|--------------------|---------|-------------------------|---------|
|                                                                                                                                                                                                                                                                                               | Adjusted SHR*      | P-value | Adjusted HR             | P-value |
| <b>Demographics</b>                                                                                                                                                                                                                                                                           |                    |         |                         |         |
| Age in days                                                                                                                                                                                                                                                                                   |                    |         |                         |         |
| 0 to 2                                                                                                                                                                                                                                                                                        | 3.03 (1.33–6.94)   | 0.009   | ¶                       |         |
| 3 to 7                                                                                                                                                                                                                                                                                        | 4.08 (1.48–11.3)   | 0.007   | ¶                       |         |
| 8 to 28                                                                                                                                                                                                                                                                                       | 2.57 (0.90–7.29)   | 0.08    | ¶                       |         |
| >28                                                                                                                                                                                                                                                                                           | Reference          |         |                         |         |
| <b>Anthropometry</b>                                                                                                                                                                                                                                                                          |                    |         |                         |         |
| Low birth weight                                                                                                                                                                                                                                                                              | 1.55 (1.10–2.20)   | 0.01    | 2.76 (1.30–5.82)        | 0.008   |
| <b>Clinical features</b>                                                                                                                                                                                                                                                                      |                    |         |                         |         |
| Axillary temperature                                                                                                                                                                                                                                                                          |                    |         |                         |         |
| <36°C                                                                                                                                                                                                                                                                                         | 1.49 (0.97–2.28)   | 0.07    | 1.44 (0.71–2.95)        | 0.31    |
| 36 to 37.5°C                                                                                                                                                                                                                                                                                  | Reference          |         | Reference               |         |
| >37.5°C                                                                                                                                                                                                                                                                                       | 0.67 (0.39–1.13)   | 0.13    | 0.22 (0.06–0.78)        | 0.02    |
| Missing temperature                                                                                                                                                                                                                                                                           | 3.37 (0.85–13.4)   | 0.09    | 0.48 (0.09–2.64)        | 0.40    |
| Respiratory rate/min                                                                                                                                                                                                                                                                          |                    |         |                         |         |
| Bradypnoea                                                                                                                                                                                                                                                                                    | 2.22 (1.36–3.63)   | 0.001   | ¶                       |         |
| Normal                                                                                                                                                                                                                                                                                        | Reference          |         |                         |         |
| Tachypnoea                                                                                                                                                                                                                                                                                    | 0.78 (0.55–1.11)   | 0.17    | ¶                       |         |
| Missing                                                                                                                                                                                                                                                                                       | -                  |         |                         |         |
| Heart rate/min                                                                                                                                                                                                                                                                                |                    |         |                         |         |
| Bradycardia                                                                                                                                                                                                                                                                                   | 1.88 (1.14–3.12)   | 0.01    | 3.56 (1.14–11.2)        | 0.03    |
| Normal                                                                                                                                                                                                                                                                                        | Reference          |         | Reference               |         |
| Tachycardia                                                                                                                                                                                                                                                                                   | 1.57 (1.11–2.21)   | 0.01    | 1.54 (0.77–3.07)        | 0.22    |
| Missing                                                                                                                                                                                                                                                                                       | 0.25 (0.02–3.00)   | 0.28    | -                       |         |
| Hypoxia (SaO <sub>2</sub> <90%)                                                                                                                                                                                                                                                               | 1.60 (1.14–2.24)   | 0.006   | ¶                       |         |
| Lower chest wall indrawing                                                                                                                                                                                                                                                                    | 1.42 (0.91–2.22)   | 0.12    | ¶                       |         |
| Stridor                                                                                                                                                                                                                                                                                       | 3.74 (1.87–7.49)   | <0.001  | ¶                       |         |
| Breathing difficulty                                                                                                                                                                                                                                                                          | 2.13 (1.25–3.64)   | 0.005   | ¶                       |         |
| Capillary refill >2 seconds                                                                                                                                                                                                                                                                   | 1.94 (1.06–3.56)   | 0.03    | ¶                       |         |
| Weak pulse                                                                                                                                                                                                                                                                                    | 2.15 (1.27–3.65)   | 0.004   | 1.60 (0.24–10.5)        | 0.63    |
| Pallor                                                                                                                                                                                                                                                                                        | 2.36 (1.46–3.83)   | <0.001  | ¶                       |         |
| <b>Laboratory features</b>                                                                                                                                                                                                                                                                    |                    |         |                         |         |
| Bacteraemia                                                                                                                                                                                                                                                                                   | 2.50 (1.20–5.22)   | 0.02    | 0.21 (0.03–1.81)        | 0.16    |
| <b>Model performance</b>                                                                                                                                                                                                                                                                      |                    |         |                         |         |
| AUC (95% CI)                                                                                                                                                                                                                                                                                  | 0.85 (0.82–0.88)   |         | 0.79 (0.72–0.85)        |         |
| SHR; sub-distribution hazard ratios; *the SHR are from the Fine and Gray's proportional subhazards model, HR-Hazard ratio from the Proportional Cox regression model, ¶; variables not selected for inclusion in the multivariable model, AUC; area under receiver operating characteristics. |                    |         |                         |         |

Figure S1. **A: Monthly all young infant admissions, B: all admissions (<60 months old), C: all admissions (<60 months old) case fatality and D: 2–59 months old case fatality before and after July 2013.**

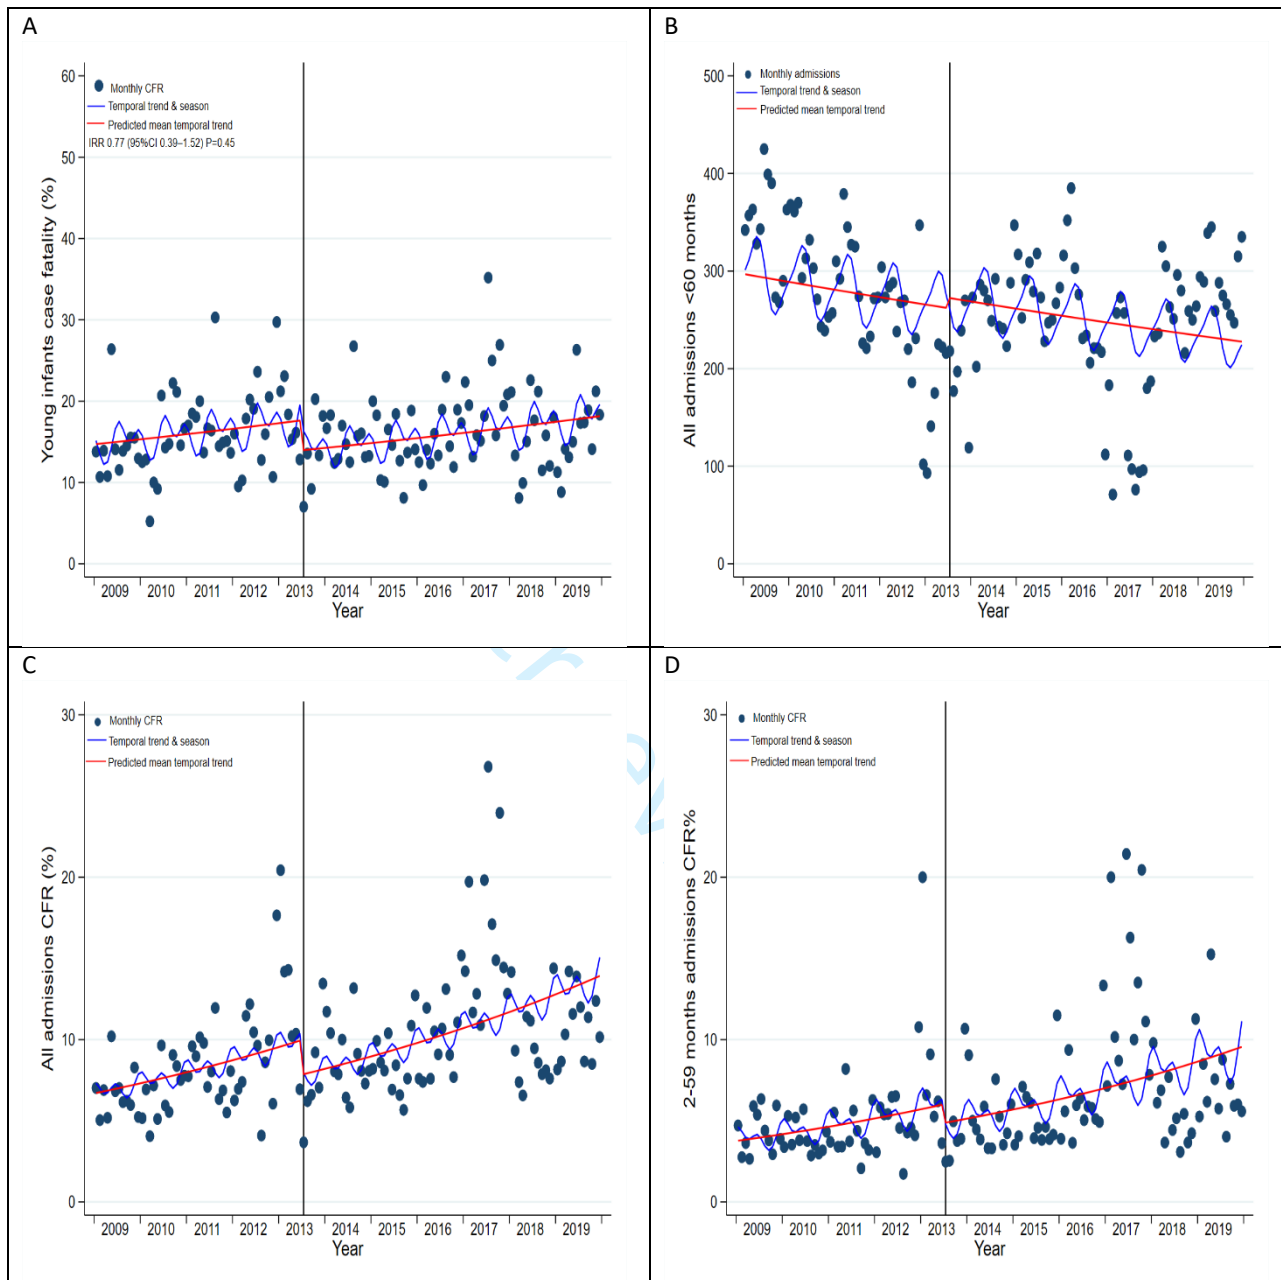

# BMJ Open

## Trends in inpatient and post-discharge mortality among young infants admitted to Kilifi County Hospital, Kenya, a retrospective cohort study.

|                                 |                                                                                                                                                                                                                                                                                                                                                                                                                                                                                                                                                                                                                                           |
|---------------------------------|-------------------------------------------------------------------------------------------------------------------------------------------------------------------------------------------------------------------------------------------------------------------------------------------------------------------------------------------------------------------------------------------------------------------------------------------------------------------------------------------------------------------------------------------------------------------------------------------------------------------------------------------|
| Journal:                        | <i>BMJ Open</i>                                                                                                                                                                                                                                                                                                                                                                                                                                                                                                                                                                                                                           |
| Manuscript ID                   | bmjopen-2022-067482.R1                                                                                                                                                                                                                                                                                                                                                                                                                                                                                                                                                                                                                    |
| Article Type:                   | Original research                                                                                                                                                                                                                                                                                                                                                                                                                                                                                                                                                                                                                         |
| Date Submitted by the Author:   | 30-Nov-2022                                                                                                                                                                                                                                                                                                                                                                                                                                                                                                                                                                                                                               |
| Complete List of Authors:       | Talbert, Alison; KEMRI-Wellcome Trust Research Programme Ngari, Moses; KEMRI-Wellcome Trust Research Programme Obiero, Christina; KEMRI-Wellcome Trust Research Programme; University of Amsterdam, Department of Global Health Nyaguara, A.; KEMRI-Wellcome Trust Research Programme Mwangome, MK; KEMRI-Wellcome Trust Research Programme Mturi, Neema; KEMRI-Wellcome Trust Research Programme Ouma, Nelson; KEMRI-Wellcome Trust Research Programme Otiende, M.; KEMRI-Wellcome Trust Research Programme Berkley, James ; KEMRI-Wellcome Trust Research Programme; University of Oxford, Centre for Tropical Medicine & Global Health |
| <b>Primary Subject Heading</b>: | Paediatrics                                                                                                                                                                                                                                                                                                                                                                                                                                                                                                                                                                                                                               |
| Secondary Subject Heading:      | Epidemiology                                                                                                                                                                                                                                                                                                                                                                                                                                                                                                                                                                                                                              |
| Keywords:                       | Epidemiology < TROPICAL MEDICINE, PAEDIATRICS, NEONATOLOGY, EPIDEMIOLOGY                                                                                                                                                                                                                                                                                                                                                                                                                                                                                                                                                                  |
|                                 |                                                                                                                                                                                                                                                                                                                                                                                                                                                                                                                                                                                                                                           |

SCHOLARONE™  
Manuscripts



I, the Submitting Author has the right to grant and does grant on behalf of all authors of the Work (as defined in the below author licence), an exclusive licence and/or a non-exclusive licence for contributions from authors who are: i) UK Crown employees; ii) where BMJ has agreed a CC-BY licence shall apply, and/or iii) in accordance with the terms applicable for US Federal Government officers or employees acting as part of their official duties; on a worldwide, perpetual, irrevocable, royalty-free basis to BMJ Publishing Group Ltd ("BMJ") its licensees and where the relevant Journal is co-owned by BMJ to the co-owners of the Journal, to publish the Work in this journal and any other BMJ products and to exploit all rights, as set out in our [licence](#).

The Submitting Author accepts and understands that any supply made under these terms is made by BMJ to the Submitting Author unless you are acting as an employee on behalf of your employer or a postgraduate student of an affiliated institution which is paying any applicable article publishing charge ("APC") for Open Access articles. Where the Submitting Author wishes to make the Work available on an Open Access basis (and intends to pay the relevant APC), the terms of reuse of such Open Access shall be governed by a Creative Commons licence – details of these licences and which [Creative Commons](#) licence will apply to this Work are set out in our licence referred to above.

Other than as permitted in any relevant BMJ Author's Self Archiving Policies, I confirm this Work has not been accepted for publication elsewhere, is not being considered for publication elsewhere and does not duplicate material already published. I confirm all authors consent to publication of this Work and authorise the granting of this licence.

1  
2  
3  
4 1 **Trends in inpatient and post-discharge mortality among young infants**  
5 2 **admitted to Kilifi County Hospital Kenya, a retrospective cohort**  
6 3 **study.**

7  
8  
9 4 Alison Talbert MRCP<sup>1</sup>, Moses Ngari PhD<sup>1,2</sup>, Christina Obiero MPH<sup>1,3</sup>, Amek Nyaguara PhD<sup>1</sup>,  
10 5 Martha Mwangome PhD<sup>1,2</sup>, Neema Mturi MRCP<sup>1</sup>, Nelson Ouma BSc<sup>1</sup>, Mark Otiende MSc<sup>1</sup>, and  
11 6 James A Berkley FRCPCH<sup>1,2,4</sup>

12  
13  
14  
15 7 Institutions of affiliation

- 16 8  
17  
18 9 1. KEMRI/Wellcome Trust Research Programme, Centre for Geographic Medicine Research  
19 -Coast, PO Box 230 - 80108, Kilifi, Kenya.  
20 10  
21 2. The Childhood Acute Illness & Nutrition Network (CHAIN), Nairobi, Kenya.  
22 11  
23 3. Department of Global Health, University of Amsterdam, Amsterdam, The Netherlands  
24 12  
25 4. Center for Tropical Medicine & Global Health, University of Oxford, Oxford, UK.  
26 13  
27  
28  
29 14

30 15 Corresponding author: Alison Talbert Email: [ATalbert@kemri-wellcome.org](mailto:ATalbert@kemri-wellcome.org)

31 16 P.O Box 230, Kilifi, 80108 Kenya Phone: +254 729 218993

32 17  
33  
34 18 Word count 3883  
35  
36  
37  
38  
39  
40  
41  
42  
43  
44  
45  
46  
47  
48  
49  
50  
51  
52  
53  
54  
55  
56  
57  
58  
59  
60

## 19 Abstract

20 **Objectives:** to describe admission trends and estimate inpatient and post-discharge mortality  
21 and its associated exposures, among young infants (YI) admitted to a county hospital in Kenya

22 **Design:** retrospective cohort study

23 **Setting:** secondary level hospital

24 **Participants:** YI aged less than 60 days admitted to hospital January 2009 to December 2019:  
25 12,271 admissions in 11,877 individuals. YI who were resident within a health and demographic  
26 surveillance system (KHDSS): n= 3,625 with 4,421 admissions were followed up for 1 year after  
27 discharge.

28 **Primary and secondary outcome measures:** Inpatient and 1-year post-discharge mortality, the  
29 latter in KHDSS residents.

30 **Results:** Of 12,271 YI admissions, 4,421 (36%) were KHDSS-resident. Neonatal sepsis, preterm  
31 complications and birth asphyxia accounted for 83% of admissions. The proportion of YI among  
32 under-fives admissions increased from 19% in 2009 to 34% in 2019 ( $P_{\text{trend}}=0.02$ ). Inpatient case  
33 fatality was 16%, with 66% of deaths occurring within 48 hours of admission. The introduction  
34 of free maternity care in 2013 was not associated with a change in admissions or inpatient  
35 mortality among YI. During 1-year post-discharge, 208/3625 (5.7%) YI died, 64.3 (95%CI 56.2–  
36 73.7) per 1,000 infant-years. 49% of post-discharge deaths occurred within one month of  
37 discharge, and 49% of post-discharge deaths occurred at home. Both inpatient and post-  
38 discharge deaths were associated with low admission weight. Inpatient mortality was



1  
2  
3 39 associated with clinical signs of disease severity, while post-discharge mortality was associated  
4  
5  
6 40 with length of hospitalization, leaving against advice and referral to a specialized hospital.  
7

8  
9 41 **Conclusions:** YIs accounted for an increasing proportion of paediatric admissions and their overall  
10  
11 42 mortality remains high. Post-discharge mortality accounts for a lower proportion of deaths but  
12  
13 43 mortality rate is higher than among children aged 2-59 months. Services to address post-  
14  
15  
16 44 discharge mortality are needed and should focus on infants at higher risk.  
17

18  
19 45  
20 46 **Key words**

21  
22  
23  
24 47 Young infant; neonatal; mortality; inpatient; post-discharge; Africa; Kenya  
25  
26

27 48 291 words  
28  
29  
30  
31  
32 50  
33  
34  
35 51  
36  
37  
38 52  
39  
40  
41 53  
42  
43  
44 54  
45  
46 55  
47  
48  
49 56  
50  
51  
52 57  
53  
54  
55 58  
56  
57  
58  
59  
60

1  
2  
3  
4 595  
6  
7 608  
9  
10 6111  
12 6213  
14  
15 63 **Article summary**16  
17  
18 64 **Strengths and limitations of this study**

- 19
- 
- 20
- 
- 21 65
- Large sample size with systematic data collection
- 22
- 
- 23 66
- Linkage of hospital admissions to a well-established demographic surveillance system,
- 24
- 
- 25 with low loss to follow up.

26 67  
27  
28 68

- Lack of accurate gestational age estimation or birthweight of most participants.

29  
3031 69

- Data are from a single hospital and only the population covered by demographic

32  
33 surveillance34 70  
35  
36 7137 72  
38  
39  
40  
41  
42  
43  
44  
45  
46  
47  
48  
49  
50  
51  
52  
53  
54  
55  
56  
57  
58  
59  
60

## 73 Background

74 The United Nations Sustainable Development Goal 3 aims to ensure healthy living and promote  
75 wellbeing for all ages, with all countries aiming to reduce neonatal and under-five mortality to  
76 below 12 and 25 per 1,000 live births by 2030 respectively. In sub-Saharan Africa, child mortality  
77 has declined by ~58% in the last 30 years. However, the estimated neonatal and under-five  
78 mortality rates in sub-Saharan Africa remained high in 2019 (27 and 76 per 1,000 live births  
79 respectively) with a similar neonatal mortality rate of 27 per 1,000 live births in Kenya.<sup>1</sup>  
80 Combined neonatal and post-neonatal infant mortality accounts for over three quarters of all  
81 under-five deaths in Kenyan children.<sup>2</sup>

82 Young infants aged <60 days old (YI) comprise around half of hospital admissions in sub-Saharan  
83 Africa and continue to face high risk of in-hospital mortality and long-term neuro-disability.<sup>3-6</sup>  
84 Post-discharge mortality is emerging as a major problem in children in low- and middle-income  
85 countries (LMICs),<sup>7</sup> however, there are limited data among YI. A systematic review of paediatric  
86 post-discharge mortality in developing countries included 24 studies published up to July 2017  
87 with 19 from Africa.<sup>8</sup> Four studies included YI. Although young age was reported as a risk factor  
88 of mortality, no studies specifically identified deaths among infants aged <60 days. We have  
89 previously demonstrated excess post-discharge mortality among all hospitalised children,  
90 suggesting that hospitalisation itself selects vulnerable children with a sustained increased risk  
91 of dying over the longer term.<sup>7,9</sup>

1  
2  
3 92 Better understanding of YI deaths occurring during hospitalisation and after discharge from  
4  
5  
6 93 hospital is vital for development and use of targeted interventions aimed at improving survival.  
7  
8  
9 94 This analysis aimed to describe admission trends and measure inpatient and post-discharge  
10  
11 95 mortality and its associated exposures, including the introduction of free maternity care, among  
12  
13  
14 96 YI admitted to Kilifi County Hospital (KCH), Kenya and followed up through the Kilifi Health and  
15  
16 97 Demographic Surveillance System (KHDSS).  
17  
18  
19  
20 98  
21  
22  
23  
24  
25  
26  
27  
28  
29  
30  
31  
32  
33  
34  
35  
36  
37  
38  
39  
40  
41  
42  
43  
44  
45  
46  
47  
48  
49  
50  
51  
52  
53  
54  
55  
56  
57  
58  
59  
60

## 99 **Methods**

### 100 *Study participants and design*

101 KCH is a secondary-level referral hospital situated in Kilifi County along the Kenyan coast. It serves  
102 a rural and peri-urban population. It has a maternity unit. with approximately 6,000 deliveries  
103 per year, a general paediatric ward with a newborn unit for babies aged less than 1 month, and  
104 a paediatric High Dependency Unit (HDU) that also admits YIs. The year 2009 was selected as a  
105 starting point, because a previous analysis of mortality among YI covered admissions from 1990  
106 to 2008<sup>10</sup>. Free maternity care was introduced by the Kenyan government on 1<sup>st</sup> June 2013 and  
107 led to a marked increase in health facility births.<sup>11</sup>

108 The KHDSS, established in 2002, covers a population of 279,158 within an area of 900km<sup>2</sup> centred  
109 on KCH.<sup>12</sup> Census rounds visit each household every four months to ascertain vital status and  
110 migration in and out of the hospital catchment area.

111 We conducted a retrospective cohort study of YIs resident within the KHDSS who were admitted  
112 to KCH between January 1<sup>st</sup>, 2009, and December 31<sup>st</sup>, 2019. Children discharged alive and  
113 followed up in KHDSS census rounds until March 2021 were eligible for analyses of post-discharge  
114 mortality. During the study period, there were 9 health workers' strikes with the last nurses'  
115 strike lasting for 150 days (5<sup>th</sup> June to 2<sup>nd</sup> November 2017).<sup>13</sup> **Supplementary Table S1.** For  
116 comparison, we also examined admissions aged 60 days to 59 months during the same period.

117

1  
2  
3 118 *Procedures*  
4  
5

6  
7 119 At admission, standardised medical history, and clinical examination, including anthropometric  
8  
9 120 measurements were obtained by trained clinical staff. Blood samples were systematically taken  
10  
11 121 for complete blood count, slide for malaria microscopy, and clinical chemistry, Human  
12  
13 122 Immunodeficiency Virus (HIV) antibody test and blood culture at hospital admission, as described  
14  
15 123 previously.<sup>14</sup> A lumbar puncture for cerebrospinal fluid (CSF) analysis was done at admission in  
16  
17 124 infants in whom sepsis was suspected and deferred in those seriously ill or with other  
18  
19 125 contraindications. Clinical and laboratory data were recorded in real time on a ward surveillance  
20  
21 126 database linked to the KHDSS database. Empiric antibiotics were initiated according to national  
22  
23 127 guidelines<sup>15</sup> with ampicillin/benzylpenicillin plus gentamicin as first-line intravenous therapy.  
24  
25 128 Second-line and subsequent antimicrobial therapy was guided by blood culture results and  
26  
27 129 clinical progress. Mechanical ventilation was not available at KCH.  
28  
29  
30  
31  
32  
33

34 130 *Statistical methods*  
35  
36

37 131 *Study variables*  
38  
39

40  
41 132 Outcomes of interest were death in hospital and during 1 year after discharge. Exposures of  
42  
43 133 interest were demographic, nutritional, clinical features, and haematological, biochemical, and  
44  
45 134 microbiological findings at the time of admission. De-identified study data were deposited in the  
46  
47 135 Harvard Dataverse depository.<sup>16</sup>  
48  
49  
50

51 136  
52  
53  
54

55 137  
56  
57  
58  
59  
60

1  
2  
3 138  
4  
5  
6 139 Weight at admission and mid-upper arm circumference (MUAC) were categorised as shown on  
7  
8  
9 140 **Table 1.** Because approximately 40% of the YI were underweight (<2.5kg), and 60% were aged ≤2  
10  
11 141 days at admission, YI's admission weights rather than anthropometric Z scores using WHO  
12  
13 142 standards were reported. Furthermore, most YI who were born at home or in other hospitals and  
14  
15 143 referred to KCH were missing gestational age estimates and birth weight to be able to estimate  
16  
17 144 gestational age at birth using the INTERGROWTH 21st Newborn Size Standards (INSS).

18  
19  
20  
21 145 Prematurity was defined as gestation age <37 weeks and LBW as birth weight <2500 grams for  
22  
23 146 YIs born at KCH. Admission blood glucose was categorized into <2.6, 2.6 to 7.0 and ≥7.0 mmol/l  
24  
25 147 representing low, normal and high levels respectively.<sup>15</sup> Missing data were not assumed to be  
26  
27 148 missing at random. We, therefore, created categorical variables and added a missing category  
28  
29 149 which was included in the regression analysis.

30  
31  
32  
33  
34 150 Demographic, anthropometric, and clinical data are presented as frequencies and proportions  
35  
36 151 for categorical variables and means (standard deviation (sd)) or median (interquartile range  
37  
38 152 (IQR)) for continuous variables depending on the underlying distribution. Proportions of missing  
39  
40 153 data for each variable are shown on **Supplementary Table S2.**

41  
42  
43  
44  
45 154 Monthly admissions and case fatality were plotted against time (month of admission) to visually  
46  
47 155 inspect the trend from 2009 to 2019 and the predicted trend line superimposed on the curves.  
48  
49 156 We used the Augmented Dickey Fuller test (ADF test) to test if the time series were stationary  
50  
51 157 (no trend or seasonal effects). We also presented annual absolute admissions, proportion of YI  
52  
53 158 among all admissions <60 months and case fatality. Monthly admissions and case fatality were  
54  
55  
56  
57  
58  
59  
60

1  
2  
3 159 tested for annual linear trend using an extension of the Wilcoxon rank-sum test of trend across  
4  
5  
6 160 ordered groups.<sup>17</sup>  
7

8  
9 161 We used interrupted time series analysis to estimate the level and trend changes before and  
10  
11 162 after introduction of free maternity care (1st June 2013). We created a time month variable  
12  
13 163 coded sequentially from January 2009 to December 2019 and a binary variable coded as 0 and 1  
14  
15 164 for admissions before and after June 2013 respectively to represent to represent introduction of  
16  
17 165 free maternity care . We defined seasonal effect variable using month of the year modelled on  
18  
19 166 harmonic terms using the Fourier code in STATA. To measure the effect of free maternity care,  
20  
21 167 we used the negative binomial regression model because of presence of overdispersion in the  
22  
23 168 trends and reported regression coefficients transformed into incidence rate ratios (IRR). All the  
24  
25 169 negative binomial regression models included the following independent variables: the time  
26  
27 170 month variable, the binary pre- and post- free maternity care variable and the seasonal effect  
28  
29 171 variable.  
30  
31  
32  
33  
34  
35

36 172 Since YIs could be admitted more than once whilst <60 days old, we included multiple admissions  
37  
38 173 using unique IDs and adjusted for clustering by individual with robust standard errors. To identify  
39  
40 174 exposures associated with inpatient death, we treated being discharged alive as a competing  
41  
42 175 event and fitted the proportional sub-distribution hazard model using the Fine-Gray competing  
43  
44 176 risk model.<sup>18</sup> The measure of effect reported from the model was the sub-distribution hazard  
45  
46 177 ratios (SHR) and their respective 95% confidence intervals (CI). To build the multivariable  
47  
48 178 regression model, a backward stepwise approach was used where all the independent variables  
49  
50 179 assessed in the univariate models were included in the model and only those with a P-value <0.1  
51  
52 180 retained in the final multivariable model.  
53  
54  
55  
56  
57  
58  
59  
60



1  
2  
3 181 For the post-discharge analysis, only data from those YI discharged alive and resident within the  
4  
5  
6 182 KHDSS were analysed. Time at risk was defined from date of discharge to 365 days later or  
7  
8 183 censure at date of death or outmigration from the KHDSS. We performed a ‘multiple discharges’  
9  
10  
11 184 analysis where YI with multiple admissions had their follow-up time reset at each successive  
12  
13 185 discharge date. Exposures associated with post-discharge were assessed using a Gamma  
14  
15 186 distribution shared frailty Cox proportional hazards regression model accounting for YI with  
16  
17  
18 187 multiple discharges. The proportional hazards assumption was assessed using the scaled  
19  
20 188 Schoenfeld residuals test (**Supplementary Tables S3 and S4**). All exposures assessed in the  
21  
22  
23 189 univariate models were considered for inclusion in the multivariable Cox proportional hazards  
24  
25 190 regression model using a backward stepwise approach similar to the inpatient analysis. Both the  
26  
27  
28 191 inpatient and post-discharge multivariable regression models’ discrimination performance were  
29  
30 192 assessed using bootstrapped area under receiver operating characteristic curves (AUC) replicated  
31  
32  
33 193 1000 times.

34  
35 194 As sensitivity analysis, we assessed the YI born at KCH and enrolled to the Kilifi Perinatal and  
36  
37  
38 195 Maternal Research Project (KIPMAT), which had collected comprehensive birth data including  
39  
40  
41 196 birth weight and gestational age (weeks).<sup>19</sup> We estimated their birthweight Z scores using the  
42  
43 197 INTERGROWTH Newborn Size Standards (INSS) and ran the regression models replacing  
44  
45 198 admission weight with birthweight Z score.<sup>20</sup>

46  
47  
48 199 Statistical significance was evaluated using 95% CI and a two-tailed *P*-value <0.05. Statistical  
49  
50  
51 200 analyses were conducted using STATA Version 17.0 (College Station, TX, USA).

52  
53  
54 201 *Study size*

1  
2  
3 202 We used all available eligible YI data from 2009 to 2019 (4,421 for inpatient and 3,625 for post-  
4  
5  
6 203 discharge analyses) regardless of sample size.

7  
8 204

9  
10 205 *Ethical considerations*

11  
12  
13 206 Written consent was provided by the caregivers of all the surveillance study participants. Ethical  
14  
15  
16 207 approval to conduct this analysis was granted by the Kenya Medical Research Institute (KEMRI)  
17  
18  
19 208 National Ethics Review Committee (SCC 2778).

20  
21 209 *Patient and public involvement*

22  
23  
24 210 There was no patient and public involvement in the planning or execution of this retrospective  
25  
26  
27 211 cohort study.

28  
29  
30 212  
31  
32  
33  
34  
35  
36  
37  
38  
39  
40  
41  
42  
43  
44  
45  
46  
47  
48  
49  
50  
51  
52  
53  
54  
55  
56  
57  
58  
59  
60

## 213 Results

### 214 *Baseline characteristics*

215 During the study period, there were 42,742 paediatric admissions to KCH, of which 12,271 (29%)  
216 admission events among 11,877 individuals were aged <60 days. Of the 12,271 YI admission  
217 events, 4,421 (36%) were resident in the KHDSS and included in the analysis (**Figure 1**). This  
218 comprised 4,272 individual YI: 4,131 with one admission, 133 two admissions and 8 three  
219 admissions within the first 60 days of life.

### 220 *KHDSS-resident admissions*

221 Among the 4,421 YI admission events among KHDSS residents, 2,731 (62%) were  $\leq 2$  days old and  
222 1,900 (43%) were female. Reported prematurity and low birth weight were 1,019 (23%) and 581  
223 (13%) respectively. Low weight (<2.5kg) was observed in 1694 YIs (38%) while 1342 (30%) had  
224 MUAC <9.0cm. Common presenting clinical signs were lower chest wall indrawing (46%) and  
225 breathing difficulty (49%). Thirty percent had fever, 31% had hypothermia and 30% tachycardia.  
226 Nine hundred and thirty-two YI (21%) had hypoxia (SaO<sub>2</sub> <90%) at admission and 250 (5.7%) had  
227 impaired consciousness. Presenting signs at admission for all the YI stratified by KHDSS residence  
228 are shown on **Table 1**. Malaria was rare (n=4, 0.09%) whilst 142 (3.2%) and 170 (3.9%) YI were  
229 HIV antibody positive and had bacteraemia respectively. **Supplementary Table S3** lists the  
230 bacterial isolates that were presumed pathogens, led by *Klebsiella pneumoniae*, *Escherichia coli*,  
231 *Staphylococcus aureus* and Group B Streptococcus.

232

233 **Table 1. Study participants characteristics at admission.**

|                                   | All young infant admissions (N=12,271) <sup>a</sup> | Young infant admissions KHDSS residents (N=4,421) | Young infant admissions non-KHDSS residents (N=7,850) | p-value |
|-----------------------------------|-----------------------------------------------------|---------------------------------------------------|-------------------------------------------------------|---------|
| <b>Demographics</b>               |                                                     |                                                   |                                                       |         |
| Age in days                       |                                                     |                                                   |                                                       |         |
| 0 to 2                            | 7856 (64)                                           | 2731 (62)                                         | 5125 (65)                                             | <0.001  |
| 3 to 7                            | 1384 (11)                                           | 468 (11)                                          | 916 (12)                                              |         |
| 8 to 28                           | 1506 (12)                                           | 587 (13)                                          | 919 (12)                                              |         |
| >28                               | 1525 (12)                                           | 635 (14)                                          | 890 (11)                                              |         |
| Sex (female)                      | 5245 (43)                                           | 1900 (43)                                         | 3345 (43)                                             | 0.70    |
| Reported born premature           | 2970 (24)                                           | 1019 (23)                                         | 1951 (25)                                             | 0.005   |
| Reported low birth weight         | 1782 (15)                                           | 581 (13)                                          | 1201 (15)                                             | <0.001  |
| Born at KCH                       |                                                     |                                                   |                                                       |         |
| Yes                               | 6757 (55)                                           | 2743 (62)                                         | 4014 (51)                                             | <0.001  |
| No                                | 5514 (45)                                           | 1678 (38)                                         | 3836 (49)                                             |         |
| <b>Anthropometry</b>              |                                                     |                                                   |                                                       |         |
| Weight (kg)                       |                                                     |                                                   |                                                       |         |
| <1.5                              | 1767 (14)                                           | 566 (13)                                          | 1201 (15)                                             | <0.001  |
| 1.5 to <2.5                       | 3211 (26)                                           | 1128 (26)                                         | 2083 (27)                                             |         |
| ≥2.5                              | 7193 (59)                                           | 2684 (61)                                         | 4509 (57)                                             |         |
| Missing                           | 100 (0.8)                                           | 43 (1.0)                                          | 57 (0.7)                                              |         |
| MUAC (cm)                         |                                                     |                                                   |                                                       |         |
| <9                                | 3933 (32)                                           | 1342 (30)                                         | 2591 (33)                                             | <0.001  |
| 9 to 10                           | 2492 (20)                                           | 862 (20)                                          | 1630 (21)                                             |         |
| 10 to 11                          | 2926 (24)                                           | 1035 (23)                                         | 1891 (24)                                             |         |
| ≥11                               | 2622 (21)                                           | 1056 (24)                                         | 1566 (20)                                             |         |
| Missing                           | 298 (2.4)                                           | 126 (2.9)                                         | 172 (2.2)                                             |         |
| <b>Clinical features</b>          |                                                     |                                                   |                                                       |         |
| Axillary temperature              |                                                     |                                                   |                                                       |         |
| <36°C                             | 3553 (29)                                           | 1358 (31)                                         | 2195 (28)                                             | <0.001  |
| 36 to 37.5°C                      | 4692 (38)                                           | 1711 (39)                                         | 2981 (38)                                             |         |
| >37.5°C                           | 3948 (32)                                           | 1318 (30)                                         | 2630 (34)                                             |         |
| Respiratory rate/min <sup>b</sup> |                                                     |                                                   |                                                       |         |
| Bradypnoea                        | 540 (4.4)                                           | 188 (4.3)                                         | 352 (4.5)                                             | 0.56    |
| Normal                            | 7333 (60)                                           | 2647 (60)                                         | 4686 (60)                                             |         |
| Tachypnoea                        | 4158 (34)                                           | 1490 (34)                                         | 2668 (34)                                             |         |
| Missing                           | 240 (2.0)                                           | 96 (2.2)                                          | 144 (1.8)                                             |         |
| Heart rate/min <sup>c</sup>       |                                                     |                                                   |                                                       |         |
| Bradycardia                       | 396 (3.2)                                           | 158 (3.6)                                         | 238 (3.0)                                             | 0.11    |
| Normal                            | 8162 (67)                                           | 2910 (66)                                         | 5252 (67)                                             |         |
| Tachycardia                       | 3667 (30)                                           | 1331 (30)                                         | 2336 (30)                                             |         |
| Missing                           | 46 (0.4)                                            | 22 (0.5)                                          | 24 (0.3)                                              |         |

|                                                           |            |           |           |        |
|-----------------------------------------------------------|------------|-----------|-----------|--------|
| Hypoxia <sup>d</sup>                                      | 2668 (22)  | 932 (21)  | 1736 (22) | 0.19   |
| Lower chest wall indrawing                                | 5562 (45)  | 2051 (46) | 3511 (45) | 0.13   |
| Wheeze                                                    | 112 (0.9)  | 46 (1.0)  | 66 (0.8)  | 0.41   |
| Stridor                                                   | 62 (0.5)   | 19 (0.4)  | 43 (0.6)  | 0.48   |
| Breathing difficulty                                      | 5966 (49)  | 2172 (49) | 3794 (48) | 0.44   |
| Cyanosis                                                  | 560 (4.6)  | 210 (4.8) | 350 (4.5) | 0.54   |
| Capillary refill >2 seconds                               | 301 (2.6)  | 105 (2.4) | 196 (2.5) | 0.81   |
| Temperature gradient                                      | 710 (5.8)  | 258 (5.8) | 452 (5.8) | 0.73   |
| Weak pulse                                                | 463 (3.8)  | 157 (3.6) | 306 (3.9) | 0.05   |
| Lethargy                                                  | 971 (7.9)  | 325 (7.4) | 646 (8.2) | 0.15   |
| Impaired consciousness <sup>e</sup>                       | 792 (6.5)  | 250 (5.7) | 542 (6.9) | 0.007  |
| Bulging fontanel                                          | 111 (0.9)  | 32 (0.7)  | 79 (1.0)  | 0.21   |
| Stiff neck                                                | 48 (0.4)   | 10 (0.2)  | 38 (0.5)  | 0.05   |
| Convulsions                                               | 689 (5.6)  | 197 (4.5) | 492 (6.3) | <0.001 |
| Sunken eyes                                               | 134 (1.1)  | 44 (1.0)  | 90 (1.2)  | 0.44   |
| Reduced skin turgor                                       | 308 (2.5)  | 97 (2.2)  | 211 (2.7) | 0.19   |
| Pallor                                                    | 633 (5.2)  | 221 (5.0) | 412 (5.3) | 0.55   |
| <b>Laboratory features</b>                                |            |           |           |        |
| Meningitis <sup>f</sup>                                   | 98 (0.8)   | 33 (0.8)  | 65 (0.8)  | 0.87   |
| Haemoglobin <11 g/dl <sup>g</sup>                         | 1207 (9.8) | 476 (11)  | 731 (9.3) | 0.02   |
| HIV antibody positive                                     | 441 (3.6)  | 142 (3.2) | 299 (3.8) | 0.11   |
| Malaria slide positive                                    | 5 (0.04)   | 4 (0.09)  | 1 (0.01)  | 0.02   |
| Bacteraemia                                               | 590 (4.8)  | 170 (3.9) | 420 (5.4) | <0.001 |
| White blood cells (10 <sup>12</sup> cells/L) <sup>h</sup> |            |           |           |        |
| <4                                                        | 134 (1.1)  | 54 (1.2)  | 80 (1.0)  | <0.001 |
| 4–20                                                      | 8738 (71)  | 3228 (73) | 5510 (70) |        |
| >20                                                       | 2202 (18)  | 690 (16)  | 1512 (19) |        |
| unavailable                                               | 1197 (9.8) | 449 (10)  | 748 (9.5) |        |
| Platelets (10 <sup>9</sup> cells/L) <sup>i</sup>          |            |           |           |        |
| <150 cells/L                                              | 1615 (13)  | 586 (13)  | 1029 (13) | 0.59   |
| ≥150                                                      | 9455 (77)  | 3387 (77) | 6068 (77) |        |
| unavailable                                               | 1201 (9.8) | 448 (10)  | 753 (9.6) |        |
| Blood glucose (mmols/L)                                   |            |           |           |        |
| <2.6                                                      | 2479 (20)  | 882 (20)  | 1597 (20) | 0.29   |
| 2.6 to 7.0                                                | 5086 (41)  | 1875 (42) | 3211 (41) |        |
| >7.0                                                      | 688 (5.6)  | 231 (5.2) | 457 (5.8) |        |
| unavailable                                               | 4018 (33)  | 1433 (32) | 2585 (33) |        |

<sup>a</sup>-Eligible admissions were young infants aged <60days admitted from 2009 to 2019, <sup>b</sup>- Tachypnoea: respiratory rate ≥60 breaths/min, Bradypnoea: respiratory rate <30 breaths/min, <sup>c</sup>-Tachycardia: heart rate>160 beats/min, Bradycardia: heart rate<100 beats/min, <sup>d</sup>-Hypoxia: oxygen saturation<90%,<sup>e</sup>- Impaired consciousness level if 'prostrate' or 'unconscious', <sup>f</sup> Meningitis: positive CSF culture, or positive CSF microscopy, or positive CSF antigen test, or elevated CSF WBC count (≥20 in young infants aged 0-28 days OR, ≥10 in young infants aged 29-59 days) PLUS a positive blood culture for a known pathogen, <sup>g</sup> Anaemia: haemoglobin <11 g/dl, <sup>h</sup> Normal values WBC 4-20 x 10<sup>12</sup> cells/L, Leucopenia WBC <4 x 10<sup>12</sup> cells/L, Leucocytosis WBC >20 x 10<sup>12</sup> cells/L, <sup>i</sup> Normal values Platelets ≥150x10<sup>9</sup> cells/L, Thrombocytopenia <150x10<sup>9</sup> cells/L, KHDSS: Kilifi Health and Demographic Surveillance System, MUAC: Mid-upper arm circumference.

### 234 *Admissions over time*

235 The annual number of admissions are shown in **Supplementary Table S4**. The overall proportion  
 236 of YI among all admissions under 5 years old was 28% (95%CI 27–29%), increasing from 19% in  
 237 2009 to 34% in 2019 (test of linear trend P=0.02) **Figure 2**. **Figure 3A** shows the upward trend of  
 238 absolute YI admissions and downward trends for 2 to 59-month-olds and all admissions <60  
 239 months old (all P-values for tests for stationarity <0.05). There was no significant difference in  
 240 monthly YI admissions before introduction of free maternity care in June 2013 (monthly median  
 241 [IQR] of 76 [66–96] admissions) and after June 2013 (monthly median [IQR] of 95 [78–125]  
 242 admissions) season-adjusted IRR 1.06 (95%CI 0.54–2.09) P=0.86 (**Supplementary Figure S1A**).  
 243 The mean monthly YI admissions on day of birth did not differ before and after June 2013; season-  
 244 adjusted IRR 0.88 (95%CI 0.44 to 1.76), P=0.72. The proportion of YI admissions to total  
 245 admissions aged <60 months before and after June 2013 were not different; season-adjusted IRR  
 246 1.02 (95%CI 0.28–3.71) P=0.97 **Figure 3D**. We found no significant difference in monthly absolute  
 247 admissions (all admissions <60 months old), before and after June 2013; season-adjusted IRR  
 248 1.01 (95%CI 0.51–2.00) P=0.97 (**Supplementary Figure S1B**).

### 249 *Inpatient deaths*

1  
2  
3 250 Overall, 1,914/11,877 (16%) of YI died in hospital. The risk of inpatient death was not significantly  
4  
5  
6 251 different between 645/4,272 (15%) KHDSS residents and 1,269/7,605 (17%) non-residents of  
7  
8 252 KHDSS (age- and sex-adjusted SHR 0.93 (95%CI 0.85–1.02) P=0.12) (**Figure 1**). The annual YI  
9  
10 253 inpatient case fatality ratio was stable (11% in 2009 and 13% in 2019. P-value for trend=0.80),  
11  
12  
13 254 **Figure 2**. Monthly inpatient case fatality for YI, 2 to 59 months old and all <60 months old children  
14  
15 255 are shown in **Figure 3B**.

16  
17  
18 256 During the study period there were 3,119 inpatient deaths among admissions <60 months old  
19  
20  
21 257 admitted at KCH, with YI admissions accounting for 61% (95%CI 60–63%) of the deaths and no  
22  
23 258 significant linear trend from 2009 to 2019 (trend P=0.29). The mean monthly YI inpatient case  
24  
25  
26 259 fatality was 16% (sd 0.86) and 16% (sd 1.23) before and after June 2013 respectively; season-  
27  
28 260 adjusted IRR 0.77 (95%CI 0.39–1.52) P=0.45 **Figure 3C**. The mean monthly case fatality for all  
29  
30  
31 261 admissions aged <60 months and admissions 2–59 months old did not differ before June 2013  
32  
33 262 and after June 2013; season-adjusted IRR 0.79 (95%CI 0.39–1.58) P=0.50 and IRR 0.81 (95%CI  
34  
35 263 0.39–1.69) P=0.57 respectively **Supplementary Figure S1 C and D**.

36  
37  
38 264 Among the 4,421 KHDSS-resident YI admissions, median [IQR] time to death was 2 [1–4] days,  
39  
40  
41 265 while the survivors were admitted for 5 [3–8] days. A total of 423/645 (66%) deaths occurred  
42  
43 266 within the first 48 hours following admission. Forty-one YI left against medical advice, and 55  
44  
45  
46 267 were referred to other hospitals for further care.

47  
48  
49 268 *Admission diagnosis & case fatality ratio*  
50  
51  
52  
53  
54  
55  
56  
57  
58  
59  
60

269 The commonest reasons for hospital admission were neonatal sepsis (47%), preterm

| Discharge diagnosis <sup>a</sup>  | No. (%) Diagnosis assigned by clinician at discharge |                          |
|-----------------------------------|------------------------------------------------------|--------------------------|
|                                   | All admissions (N=4421)                              | Inpatient Deaths (N=645) |
| Neonatal sepsis                   | 2097 (47)                                            | 201 (9.6)                |
| Preterm complications             | 889 (20)                                             | 262 (29)                 |
| Birth asphyxia                    | 724 (16)                                             | 201 (28)                 |
| Neonatal jaundice                 | 611 (14)                                             | 56 (9.2)                 |
| Lower respiratory tract infection | 486 (11)                                             | 41 (8.4)                 |
| Respiratory distress syndrome     | 263 (6.0)                                            | 136 (52)                 |
| Congenital anomalies              | 215 (4.9)                                            | 55 (26)                  |
| Meningitis <sup>b</sup>           | 112 (2.5)                                            | 11 (9.8)                 |
| Anaemia                           | 78 (1.8)                                             | 14 (18)                  |
| Malnutrition                      | 36 (0.8)                                             | 1 (2.8)                  |
| None specified                    | 69 (1.6)                                             | 4 (5.8)                  |
| Others                            | 266 (6.0) <sup>c</sup>                               | 13 (4.9)                 |

270 complications (20%) and birth asphyxia (16%) accounting for 83% of all YI admissions (**Table 2**).

271 The case fatality ratios for YI with respiratory distress syndrome, preterm complications and birth  
 272 asphyxia were 52%, 29% and 28% respectively (**Table 2**).

274 **Table 2. Discharge diagnosis assigned by clinician.**



<sup>a</sup> Young infant could be assigned up to 2 diagnoses

<sup>b</sup> Meningitis: positive CSF culture, or positive CSF microscopy, or positive CSF antigen test, or elevated CSF WBC count ( $\geq 20$  in young infants aged 0-28 days OR,  $\geq 10$  in young infants aged 29-59 days) PLUS a positive blood culture for a known pathogen

<sup>c</sup> Accidents-3, Acute abdominal obstruction-15, bronchiolitis-12, burns-1, Candidiasis-1, Cellulitis abscess-21, Chickenpox-1, Chromosomal abnormality-5, CNS abscess-1, Conjunctivitis-2, Dehydration-2, Dental problems-1, Diabetes-1, Elective surgery-5, Encephalopathy-9, Epilepsy-7, Extra pulmonary TB-1, Febrile convulsions-5, Feeding difficulty-1, Gastroenteritis-15, Haemolytic uraemic syndrome-1, Hydrocephalus-11, LTB/croup-1, Immunosuppression-17, Malaria-2, Male genital problem-1, Meconium aspiration-33, Neonatal haemorrhage-14, Neonatal tetanus -10, Other skin disease-3, Otitis media-1, Poisoning (organophosphates)-1, Pyogenic arthritis-1, Rabies-1, Rash-4, renal failure-6, trauma/fractures/RTA-11, Urinary tract infection-10, upper respiratory tract infection (URTI)-24, Viral hepatitis-2, Viral infection-3.

280

281

## 282 *Exposures associated with inpatient death*

283 Variables assessed for association with inpatient death in univariate models are shown in

284 **Supplementary Table S5**. In the multivariable analysis (**Table 3**), admissions at age  $\leq 2$  days and

285 3–7 days, compared to  $\geq 28$  days old, were associated with inpatient deaths. Being born at KCH

286 was not associated with inpatient death, so was not included in the multivariate analysis. Very

287 low admission weight ( $< 1.5$  kg) and weight 1.5–2.4 kg compared to  $\geq 2.5$  kg were positively

288 associated with inpatient deaths. Signs of clinical severity (bradypnoea, tachypnoea, bradycardia,

289 hypoxia, lower chest wall indrawing, breathing difficulty, weak pulse, impaired consciousness,

290 and hypothermia, but not fever), meningitis, bacteraemia, leucopenia and leucocytosis but not

291 an HIV antibody positive test (aSHR 1.15 (95%CI 0.81–1.63)) were positively associated with

292 inpatient death. The multivariable model bootstrapped AUC was 0.88 (95%CI 0.86–0.89) **Table 3**.

293 Performance of a multivariable model including only 4,272 single admissions did not differ from

294 the model with multiple admissions (bootstrapped AUC 0.88 (95%CI 0.86–0.89) **Supplementary**

295 **Table S6**.

296 **Table 3. Multivariable regression analysis of factors associated with inpatient and post-**  
297 **discharge mortality.**

|                          | Inpatient analysis |         | Post-discharge analysis |         |
|--------------------------|--------------------|---------|-------------------------|---------|
|                          | Adjusted SHR*      | P-value | Adjusted HR             | P-value |
| <b>Demographics</b>      |                    |         |                         |         |
| Age in days              |                    |         |                         |         |
| 0 to 2                   | 2.12 (1.46–3.06)   | <0.001  | 1.30 (0.73–2.31)        | 0.37    |
| 3 to 7                   | 3.88 (2.46–6.10)   | <0.001  | 0.80 (0.38–1.68)        | 0.56    |
| 8 to 28                  | 1.42 (0.90–2.25)   | 0.13    | 1.45 (0.81–2.59)        | 0.21    |
| >28                      | Reference          |         | Reference               |         |
| Sex (female)             | 0.91 (0.78–1.07)   | 0.26    | 0.98 (0.74–1.31)        | 0.94    |
| Born at KCH              |                    |         |                         |         |
| Yes                      | ¶                  |         | Reference               |         |
| No                       | ¶                  |         | 1.59 (1.18–2.14)        | 0.003   |
| Admission days (log)     | ¶                  |         | 1.87 (1.54–2.26)        | <0.001  |
| Type of discharge        |                    |         |                         |         |
| Normal                   | ¶                  |         | Reference               |         |
| Absconded                | ¶                  |         | 3.01 (1.22–7.46)        | 0.02    |
| Transferred/referred     | ¶                  |         | 12.8 (8.11–20.2)        | <0.001  |
| <b>Anthropometry</b>     |                    |         |                         |         |
| Weight (kg)              |                    |         |                         |         |
| <1.5                     | 2.16 (1.75–2.67)   | <0.001  | 1.95 (1.38–2.74)        | <0.001  |
| 1.5 to <2.5              | 1.42 (1.16–1.74)   | 0.001   | 0.82 (0.48–1.42)        | 0.49    |
| ≥2.5                     | Reference          |         | Reference               |         |
| Missing weight           | 3.85 (2.59–5.71)   | <0.001  | -                       |         |
| <b>Clinical features</b> |                    |         |                         |         |
| Axillary temperature     |                    |         |                         |         |
| <36°C                    | 1.44 (1.17–1.78)   | 0.001   | 1.06 (0.74–1.53)        | 0.75    |
| 36 to 37.5°C             | Reference          |         | Reference               |         |
| >37.5°C                  | 1.09 (0.84–1.41)   | 0.53    | 0.69 (0.47–0.99)        | 0.04    |
| Missing temperature      | 1.03 (0.38–2.75)   | 0.96    | 1.09 (0.15–8.22)        | 0.93    |
| Respiratory rate/min     |                    |         |                         |         |
| Bradypnoea               | 1.45 (1.09–1.93)   | 0.01    | 1.66 (0.76–3.63)        | 0.21    |
| Normal                   | Reference          |         | Reference               |         |

|                                                                                                                                                                                                                                                                                                                                                                              |                  |        |                  |      |
|------------------------------------------------------------------------------------------------------------------------------------------------------------------------------------------------------------------------------------------------------------------------------------------------------------------------------------------------------------------------------|------------------|--------|------------------|------|
| Tachypnoea                                                                                                                                                                                                                                                                                                                                                                   | 0.80 (0.67–0.95) | 0.01   | 1.24 (0.93–1.66) | 0.14 |
| Missing                                                                                                                                                                                                                                                                                                                                                                      | 1.51 (0.64–3.56) | 0.34   | 0.80 (0.11–5.82) | 0.82 |
| Heart rate/min                                                                                                                                                                                                                                                                                                                                                               |                  |        |                  |      |
| Bradycardia                                                                                                                                                                                                                                                                                                                                                                  | 1.40 (1.08–1.82) | 0.01   | ¶                |      |
| Normal                                                                                                                                                                                                                                                                                                                                                                       | Reference        |        |                  |      |
| Tachycardia                                                                                                                                                                                                                                                                                                                                                                  | 1.14 (0.94–1.37) | 0.18   | ¶                |      |
| Missing                                                                                                                                                                                                                                                                                                                                                                      | 0.41 (0.03–5.13) | 0.49   | ¶                |      |
| Hypoxia (SaO <sub>2</sub> <90%)                                                                                                                                                                                                                                                                                                                                              | 1.62 (1.37–1.92) | <0.001 | ¶                |      |
| Capillary refill >2 seconds                                                                                                                                                                                                                                                                                                                                                  | 1.34 (0.97–1.86) | 0.08   | ¶                |      |
| Lower chest wall indrawing                                                                                                                                                                                                                                                                                                                                                   | 1.41 (1.14–1.75) | 0.002  | ¶                |      |
| Stridor                                                                                                                                                                                                                                                                                                                                                                      | 1.93 (0.92–4.03) | 0.08   | ¶                |      |
| Breathing difficulty                                                                                                                                                                                                                                                                                                                                                         | 1.45 (1.15–1.82) | 0.001  | ¶                |      |
| Weak pulse                                                                                                                                                                                                                                                                                                                                                                   | 1.61 (1.19–2.17) | 0.002  | 2.22 (1.01–4.89) | 0.04 |
| Bulging fontanel                                                                                                                                                                                                                                                                                                                                                             | 2.45 (0.91–6.65) | 0.08   | 2.59 (0.92–7.26) | 0.07 |
| Impaired consciousness                                                                                                                                                                                                                                                                                                                                                       | 2.21 (1.72–2.84) | <0.001 | ¶                |      |
| Pallor                                                                                                                                                                                                                                                                                                                                                                       | 1.30 (0.98–1.71) | 0.07   | ¶                |      |
| <b>Laboratory features</b>                                                                                                                                                                                                                                                                                                                                                   |                  |        |                  |      |
| Meningitis                                                                                                                                                                                                                                                                                                                                                                   | 5.45 (2.50–11.8) | <0.001 | 2.16 (0.73–6.37) | 0.17 |
| HIV antibody positive                                                                                                                                                                                                                                                                                                                                                        | 1.15 (0.81–1.63) | 0.43   | 0.94 (0.43–2.05) | 0.87 |
| Bacteraemia                                                                                                                                                                                                                                                                                                                                                                  | 2.21 (1.51–3.22) | <0.001 | ¶                |      |
| White blood cells (10 <sup>12</sup> cells/L)                                                                                                                                                                                                                                                                                                                                 |                  |        |                  |      |
| <4                                                                                                                                                                                                                                                                                                                                                                           | 2.17 (1.30–3.62) | 0.003  | ¶                |      |
| 4-20                                                                                                                                                                                                                                                                                                                                                                         | Reference        |        | ¶                |      |
| >20                                                                                                                                                                                                                                                                                                                                                                          | 1.71 (1.43–2.04) | <0.001 | ¶                |      |
| unavailable                                                                                                                                                                                                                                                                                                                                                                  | 1.09 (0.82–1.44) | 0.57   | ¶                |      |
| <b>Model performance</b>                                                                                                                                                                                                                                                                                                                                                     |                  |        |                  |      |
| Bootstrapped AUC (95% CI)                                                                                                                                                                                                                                                                                                                                                    | 0.88 (0.86–0.89) |        | 0.76 (0.73–0.80) |      |
| <p><b>SHR</b>; sub-distribution hazard ratios; *the SHR are from the Fine and Gray's proportional sub-hazards model, HR-Hazard ratio from the shared frailty Cox regression model, ¶; variables not selected for inclusion in the multivariable model, AUC; area under receiver operating characteristics. Meningitis: positive CSF culture, or positive CSF microscopy,</p> |                  |        |                  |      |

or positive CSF antigen test, or elevated CSF WBC count ( $\geq 20$  in young infants aged 0-28 days OR,  $\geq 10$  in young infants aged 29-59 days) PLUS a positive blood culture for a known pathogen

298

299 Post-discharge death

300 There were 3,776 live discharges from 3,640 YI residents of KHDSS, of which 3,760 (from 3,625  
301 individual YI) were followed up for 3,233 infant-years (**Figure 1**). During one-year follow-up, there  
302 were 208/3625 (5.7%) deaths: 64.3 (95%CI 56.2–73.7) deaths per 1,000 infant-years. The median  
303 [IQR] time to death after discharge was 35 [7–92] days. Of the 208 post-discharge deaths, 101  
304 (49%), 160 (77%), 179 (86%) and 193 (93%) occurred within 1, 3, 6 and 9 months after discharge  
305 respectively. The annual YI post-discharge case fatality was 5.4% in 2009 and 6.3% in 2019  
306 without evidence of linear trend (P-value for trend=0.77) (**Figure 2**).

307 One hundred and one (49%) of the 208 post-discharge deaths occurred at home without hospital  
308 readmission, 67 (32%) occurred during readmission to KCH and 40 (19%) occurred at other health  
309 facilities. The five leading assigned causes of deaths for the 67 deaths at KCH were: neonatal  
310 sepsis (24%), preterm complications (22%), congenital heart disease (15%), neonatal jaundice  
311 (7.4%) and meningitis (7.4%) which were similar to index admission diagnosis **Supplementary**  
312 **Table S7**. Causes of other deaths were unknown.

313 Overall, we observed 853 (20%) deaths among 4,272 individual YIs: 645 inpatient and 208 post-  
314 discharge, hence 24% of deaths were post-discharge.

315 Exposures assessed for association with post-discharge mortality are shown on **Supplementary**  
316 **Table S8**. In the multivariable Cox regression model, born outside KCH, log days of hospital

1  
2  
3 317 admission, leaving against advice, and referral to more specialized hospital were positively  
4  
5  
6 318 associated with post-discharge mortality. Other exposures associated with post-discharge  
7  
8 319 mortality were low admission weight, fever and weak pulse(**Table 3**). The multivariable model  
9  
10 320 bootstrapped AUC was 0·76 (95%CI 0·73–0·80).

11  
12  
13  
14 321 *Subgroup analysis*

15  
16  
17 322 In a subgroup analysis including 1,358 admissions of YIs born at KCH, their median [IQR]  
18  
19 323 gestational age was 38 (36–40) weeks and birth weight 2,778 (2,000–3,195) grams respectively.

20  
21  
22 324 In the univariate regression model, born premature, low birth weight and birth weight Z score  
23  
24 325 <-2 were positively associated with inpatient mortality (**Supplementary Table S9**). In the  
25  
26 326 multivariable model, low birth weight, admission age <8 days, bacteraemia and signs of clinical  
27  
28 327 severity were associated with inpatient mortality (**Supplementary Table S10**).

29  
30  
31  
32 328 Among the 1,142 YI followed up for 1,021 child-years of which 41/1,142 (3·6%) died, low birth  
33  
34 329 weight (aHR 2·76 (95%CI 1·30–5·82)) was positively associated with post-discharge mortality in  
35  
36 330 the multivariable model (**Supplementary Table S10**).

37  
38  
39  
40 331

## 332 Discussion

### 333 *Trends in admissions and proportions of young infants*

334 During the study period, we observed a marked increase in YI admissions and proportion of YI  
335 among admissions in under-fives increased from around a fifth in 2009, to more than one-third  
336 in 2019. However, this did not seem to be associated with the introduction of free maternity care  
337 in 2013. Lack of observable effect may be due to challenges faced during policy implementation  
338 arising from inadequate expansion of quality health care facilities and resources. Several authors  
339 reported an increase in mothers attending Kenyan health facilities for antenatal care and  
340 delivery,<sup>11 21</sup> however our results suggest this occurred in the context of a general trend which  
341 we previously observed during 1990-2008.<sup>10</sup>

342 Conversely, the number of admitted children older than 60 days decreased alongside a reduction  
343 in local malaria transmission,<sup>22</sup> introduction of routine childhood pneumococcal conjugate and  
344 rotavirus immunisation,<sup>23</sup> and expansion in numbers of health facilities in Kilifi County.<sup>24</sup>  
345 Variation in annual admissions over the years was due to multiple health workers' strikes.<sup>13</sup>  
346 During these periods, the general paediatric ward was closed and only the sickest children were  
347 admitted to the paediatric HDU due to limited staffing and bed capacity. The time series analysis  
348 indicated an increase in inpatient mortality during strikes (**Figure 3C**).

349 The leading diagnoses at admission in our analysis were neonatal sepsis, preterm complications,  
350 and birth asphyxia, similar to the period 1990–2008.<sup>10</sup> Over a third of admissions from KCH  
351 maternity were preterm and the hospital also received referrals of preterm and very low  
352 birthweight infants from sub-county hospitals and local health centres. There are few African

1  
2  
3 353 published datasets of neonatal or YI inpatient diagnoses; in a network of 7 Nigerian and Kenyan  
4  
5  
6 354 hospitals, prematurity accounted for over half (52%), and birth asphyxia almost a quarter (24%)  
7  
8 355 of neonatal admissions.<sup>25</sup> The leading bacterial isolates from blood cultures in our study  
9  
10 356 (*Klebsiella pneumoniae*, *Escherichia coli*, *Staphylococcus aureus*) were similar to those among YI  
11  
12  
13 357 in rural settings of Tanzania and Burkina Faso.<sup>26</sup> Kenya attained elimination status of maternal  
14  
15 358 and neonatal tetanus in 2018, following immunisation campaigns in high-risk regions.<sup>27</sup>  
16  
17  
18 359 Compared to 1990–2008,<sup>10</sup> neonatal tetanus was uncommon at our centre with only 10 cases in  
19  
20 360 11 years.

#### 21 22 23 361 *Inpatient deaths*

24  
25  
26 362 The WHO has reported that in 2019, “47% of all under-5 deaths occurred in the newborn period  
27  
28  
29 363 with about one third dying on the day of birth and close to three quarters dying within the first  
30  
31 364 week of life”.<sup>28</sup> Delivery by a skilled health worker has been shown to be effective in reducing  
32  
33  
34 365 perinatal mortality.<sup>29</sup> We did not collect data on delivery by a skilled birth attendant but in 2018/9  
35  
36 366 69% of births in Kilifi County were reported to be attended by skilled health personnel which is  
37  
38  
39 367 slightly higher than the national average.<sup>30</sup> We found YI accounted for more than 60% of under-  
40  
41 368 fives inpatient deaths, similar to a retrospective study of 16 Kenyan public hospitals in which  
42  
43  
44 369 neonatal deaths comprised 66% of inpatient paediatric deaths.<sup>5</sup> We found respiratory distress  
45  
46 370 syndrome, birth asphyxia and preterm complications had the highest inpatient mortality.  
47  
48  
49 371 Mechanical ventilation was not available in Kilifi County Hospital. Improvements in peripartum  
50  
51 372 care of mothers and infants together with appropriate technology such as non-invasive  
52  
53 373 ventilation for management of respiratory complications of preterm birth are priorities for  
54  
55  
56 374 reduction in neonatal mortality in hospitals in LMICs.<sup>5</sup>

1  
2  
3 375 *Post-discharge deaths*  
4  
5

6 376 Less than a quarter (24%) of all deaths during 1-year of follow up occurred post-discharge. This  
7  
8 377 reflects a high inpatient (16%) case fatality rate with many very early inpatient deaths compared  
9  
10  
11 378 to 6.6% in children aged  $\geq 60$  days.<sup>7</sup> Nevertheless, the post-discharge YI mortality rate (64.3 per  
12  
13 379 1,000 child/years) was more than twice that of a cohort of children aged 2–59 months admitted  
14  
15  
16 380 to KCH between 2007– 2015.<sup>31</sup> This reflects post-discharge mortality rates being highest in  
17  
18 381 younger age groups, such as in Tanzania among under 1-year olds: 72 per 1,000 child/years  
19  
20  
21 382 (95% C.I. 67.2–77.2) falling to 6.9 (95% C.I. 5.5–8.7) per 1,000 child/years in 4 to <5 year olds.<sup>32</sup>  
22  
23

24 383 A greater proportion of YI post-discharge deaths occurred in hospital than among older children,<sup>7</sup>  
25  
26 384 implying that caregivers may be more likely to seek re-admission for YI or may live closer to KCH.  
27  
28  
29 385 About half of post-discharge deaths occurred within the first month, highlighting the need for  
30  
31 386 formal ‘down-referral’ for continuity of care after discharge in high risk YI.  
32  
33

34 387 Analysis of exposures revealed that some were common for both inpatient and post-discharge  
35  
36 388 mortality: low admission weight, axillary temperature, and respiratory rate. Birth weight was  
37  
38  
39 389 not available for most YI but low admission weight <2.5kg was common (40%) in our  
40  
41  
42 390 participants. In young infants it is difficult to distinguish low birth weight from malnutrition, but  
43  
44 391 we have reported the higher case fatality rates in the lower admission weight categories  
45  
46 392 (Tables S3 and S4). Of known causes of post-discharge deaths, leading ones were related to  
47  
48  
49 393 problems in the early neonatal period.  
50  
51

52 394 *Strengths and limitations of the study*  
53  
54  
55  
56  
57  
58  
59  
60



1  
2  
3 395 Strengths of this study are large sample size, systematic collection of data and linkage to a well-  
4  
5  
6 396 established demographic surveillance system, with few losses to follow up. Limitations are lack  
7  
8 397 of accurate gestational age estimation, unknown birthweight of most participants and that  
9  
10 398 individual socioeconomic data were unavailable. We did not have clinical data collected at  
11  
12  
13 399 discharge, which may be of value in taking a risk-based approach to post-discharge care. This  
14  
15 400 analysis is from a single hospital and excludes residents outside KHDSS who may have different  
16  
17  
18 401 exposures and risks.  
19  
20

## 21 402 *Conclusions*

22  
23  
24 403 Neonatal and YI admissions account for an increasing proportion of inpatient paediatric  
25  
26 404 admissions, and their overall mortality rate remains high. Post-discharge mortality accounts for  
27  
28  
29 405 a lower proportion of all deaths than hospital admissions aged 2 to 59 months but the post-  
30  
31 406 discharge mortality rate among young infants is higher.<sup>31 33</sup> This is likely because of the  
32  
33  
34 407 predominance of fatal neonatal conditions such as extreme prematurity or birth asphyxia.  
35  
36 408 Services to address post-discharge mortality are needed and should focus on infants at higher  
37  
38  
39 409 risk.  
40  
41

42 410

43  
44 411

45  
46 412

47  
48 413

49  
50 414

51  
52 415

## 53 416 *Acknowledgements*

54  
55 417  
56  
57  
58  
59  
60

1  
2  
3 418 We thank the parents, patients, and staff of Kilifi County Hospital and the KEMRI-Wellcome Trust  
4  
5 419 Research Programme for their participation in the study. This study is published with the permission of  
6  
7 420 the Director, KEMRI. This work was supported, in whole or in part, by the Bill & Melinda Gates  
8  
9 421 Foundation [Grant Number INV-00791]. Under the grant conditions of the Foundation, a Creative  
10  
11 422 Commons Attribution 4.0 Generic License has already been assigned to the Author Accepted Manuscript  
12  
13  
14 423 version that might arise from this submission.  
15  
16  
17 424

18  
19  
20 425 I, the Submitting Author has the right to grant and does grant on behalf of all authors of the Work (as  
21  
22 426 defined in the below author licence), an exclusive licence and/or a non-exclusive licence for  
23  
24 427 contributions from authors who are: i) UK Crown employees; ii) where BMJ has agreed a CC-BY licence  
25  
26 428 shall apply, and/or iii) in accordance with the terms applicable for US Federal Government officers or  
27  
28 429 employees acting as part of their official duties; on a worldwide, perpetual, irrevocable, royalty-free  
29  
30 430 basis to BMJ Publishing Group Ltd ("BMJ") its licensees and where the relevant Journal is co-owned by  
31  
32 431 BMJ to the co-owners of the Journal, to publish the Work in BMJ Global Health and any other BMJ  
33  
34 432 products and to exploit all rights, as set out in our [licence](#).  
35  
36 433

37  
38  
39 434 The Submitting Author accepts and understands that any supply made under these terms is made by  
40  
41 435 BMJ to the Submitting Author unless you are acting as an employee on behalf of your employer or a  
42  
43 436 postgraduate student of an affiliated institution which is paying any applicable article publishing charge  
44  
45 437 ("APC") for Open Access articles. Where the Submitting Author wishes to make the Work available on an  
46  
47 438 Open Access basis (and intends to pay the relevant APC), the terms of reuse of such Open Access shall  
48  
49 439 be governed by a Creative Commons licence – details of these licences and which [Creative Commons](#)  
50  
51 440 licence will apply to this Work are set out in our licence referred to above.  
52  
53  
54  
55  
56  
57  
58  
59  
60

1  
2  
3 441

4  
5 442 **Figures**

6  
7  
8 443 **Figure 1. Flow of study participants.**

9  
10  
11 444 **Figure 2. Annual proportion of YI admissions to all admissions <60 months, inpatient case**  
12  
13  
14 445 **fatality ratio (CFR) and post-discharge CFR.**

15  
16  
17 446 Proportions are plotted with 95% confidence intervals.

18  
19  
20 447 **Figure 3. A: Monthly hospital admissions (with predicted mean temporal trend), B: Monthly**  
21  
22 448 **case fatality rates (with predicted mean temporal trend), C: Monthly young infant inpatient**  
23  
24 449 **case fatality before and after June 2013 and D: Monthly proportions of young infants to**  
25  
26 450 **admissions <60 months old.**

27  
28  
29  
30 451

31  
32  
33 452

34  
35  
36 453 Ethics approval and consent to participate

37  
38 454 Written consent was provided by the caregivers of all the surveillance study participants. Ethical  
39  
40 455 approval to conduct this analysis was granted by the Kenya Medical Research Institute (KEMRI)  
41  
42 456 National Ethics Review Committee (SCC 2778).

43  
44  
45  
46 457 Consent for publication – not applicable

47  
48  
49  
50 458 Availability of data and materials

1  
2  
3 459 Data are available in a public, open access repository. Deidentified participant data and analysis  
4  
5  
6 460 code have been deposited and may be requested at the Harvard Dataverse via this  
7  
8 461 link <https://doi.org/10.7910/DVN/OXJVFX>  
9

10  
11 462 Competing interests  
12

13  
14 463 JAB declares the following: Chair of the DSMB for “**Efficacy and safety of whole-body chlorhexidine**  
15  
16 464 **cleansing in reducing bacterial skin colonisation of hospitalised neonates - a pilot trial**”. *St George’s,*  
17  
18 465 *University of London and global sites*; Treasurer of the Commonwealth Society for Paediatric  
19  
20 466 Gastroenterology & Nutrition Other authors declare they have no competing interests.  
21  
22

23  
24 467 Funding  
25

26 468 Authors NM, AN, NO, MO, and staffing, facilities, and resources were funded by the Wellcome  
27  
28 469 Trust (203077\_Z\_16\_Z). MM was supported by a Wellcome Trust International Intermediate  
29  
30 470 Fellowship (221997/Z/20/Z). JAB was supported by the Medical Research Council–Department  
31  
32 471 for International Development–Wellcome Trust Joint Global Health Trials scheme  
33  
34 472 (MR/M007367/1). JAB and MN were supported by the Bill & Melinda Gates Foundation  
35  
36 473 (OPP1131320). CWO was supported by the Drugs for Neglected Diseases initiative/Global  
37  
38 474 Antibiotic Research and Development Partnership (OXF-DND02). AT was supported by  
39  
40 475 Crosslinks.  
41  
42  
43  
44

45  
46 476 Role of the funding source  
47

48  
49 477 The funders did not have a role in study design, in the collection, analysis, and interpretation of  
50  
51 478 data, in writing the report, or in the decision to submit the paper for publication.  
52  
53  
54

55 479 Author contributions  
56  
57  
58  
59  
60

1  
2  
3 480 AT: Conceptualization, investigation, methodology, formal analysis, writing – original draft,  
4  
5  
6 481 writing– review & editing; MN: Conceptualization, methodology, data curation, formal analysis,  
7  
8 482 visualisation , writing – original draft, writing– review & editing; CWO: Conceptualization,  
9  
10 483 investigation, methodology, formal analysis, validation, writing – original draft, writing– review  
11  
12  
13 484 & editing; AN: Investigation, methodology, project administration, writing– review & editing;  
14  
15 485 MM: Conceptualization, methodology, writing– review & editing; NM: Investigation, project  
16  
17 486 administration, funding acquisition, resources, supervision, writing– review & editing; NO: Data  
18  
19 487 curation, writing– review & editing, MO: Data curation, writing– review & editing; JAB:  
20  
21 488 Conceptualisation, investigation, methodology, funding acquisition, supervision, validation,  
22  
23 489 writing– review & editing.

24  
25  
26  
27  
28 490 AT and MN contributed equally to this paper. AT, the guarantor, accepts full responsibility for  
29  
30 491 the finished work and the conduct of the study, had access to the data, and controlled the  
31  
32 492 decision to publish.

33  
34  
35  
36 493

37  
38 494

39  
40 495 **References**

- 41  
42  
43 496 1. UNICEF. Levels & Trends in Child Mortality: Report 2020, Estimates developed by the United  
44  
45  
46 497 Nations Inter-agency Group for Child Mortality Estimation. New York: United Nations Children’s Fund,  
47  
48 498 2020.
- 49  
50 499 2. Collaborators GBDCM. Global, regional, national, and selected subnational levels of stillbirths,  
51  
52 500 neonatal, infant, and under-5 mortality, 1980-2015: a systematic analysis for the Global Burden  
53  
54  
55  
56  
57  
58  
59  
60

- 1  
2  
3 501 of Disease Study 2015. *Lancet* 2016;388(10053):1725-74. doi: 10.1016/S0140-6736(16)31575-6  
4  
5 502 [published Online First: 2016/10/14]  
6  
7 503 3. English M, Ngama M, Musumba C, et al. Causes and outcome of young infant admissions to a Kenyan  
8  
9 district hospital. *Arch Dis Child* 2003;88(5):438-43. doi: 10.1136/adc.88.5.438  
10 504  
11  
12 505 4. van den Boogaard W, Manzi M, Harries AD, et al. Causes of pediatric mortality and case-fatality rates  
13  
14 506 in eight Médecins Sans Frontières-supported hospitals in Africa. *Public Health Action*  
15  
16 507 2012;2(4):117-21. doi: 10.5588/pha.12.0038  
17  
18 508 5. Irimu G, Aluvaala J, Malla L, et al. Neonatal mortality in Kenyan hospitals: a multisite, retrospective,  
19  
20 cohort study. *BMJ Glob Health* 2021;6(5) doi: 10.1136/bmjgh-2020-004475  
21 509  
22  
23 510 6. Obiero CW, Mturi N, Mwarumba S, et al. Clinical features to distinguish meningitis among young  
24  
25 511 infants at a rural Kenyan hospital. *Arch Dis Child* 2021;106(2):130-36. doi: 10.1136/archdischild-  
26  
27 512 2020-318913 [published Online First: 20200820]  
28  
29 513 7. CHAIN, Network. Childhood mortality during and after acute illness in Africa and south Asia: a  
30  
31 prospective cohort study. *Lancet Glob Health* 2022;10(5):e673-e84. doi: 10.1016/s2214-  
32 514 109x(22)00118-8  
33  
34 515  
35  
36 516 8. Nemetcheck B, English L, Kissoon N, et al. Paediatric postdischarge mortality in developing countries: a  
37  
38 systematic review. *BMJ open* 2018;8(12):e023445. doi: 10.1136/bmjopen-2018-023445  
39 517  
40  
41 518 [published Online First: 2018/12/30]  
42  
43 519 9. Moisi JC, Gatakaa H, Berkley JA, et al. Excess child mortality after discharge from hospital in Kilifi,  
44  
45 Kenya: a retrospective cohort analysis. *Bull World Health Organ* 2011;89(10):725-32, 32A. doi:  
46 520 10.2471/BLT.11.089235 [published Online First: 2011/11/16]  
47  
48 521  
49  
50 522 10. Mwaniki MK, Gatakaa HW, Mturi FN, et al. An increase in the burden of neonatal admissions to a  
51  
52 523 rural district hospital in Kenya over 19 years. *BMC Public Health* 2010;10:591. doi:  
53  
54 524 10.1186/1471-2458-10-591 [published Online First: 2010/10/12]  
55  
56  
57  
58  
59  
60

- 1  
2  
3 525 11. Lang'at E, Mwanri L, Temmerman M. Effects of implementing free maternity service policy in Kenya:  
4  
5 526 an interrupted time series analysis. *BMC Health Serv Res* 2019;19(1):645. doi: 10.1186/s12913-  
6  
7 527 019-4462-x [published Online First: 2019/09/08]  
8  
9  
10 528 12. KEMRI-WellcomeTrust, Programme. R. Health-research-linked-to-a-demographic-surveillance-  
11  
12 529 system [Available from: [https://kemri-wellcome.org/programme/health-research-linked-to-a-  
15  
16 531 demographic-surveillance-system/](https://kemri-wellcome.org/programme/health-research-linked-to-a-<br/>13<br/>14 530 demographic-surveillance-system/) accessed May 10 2021.  
17  
18 531 13. Ong'ayo G, Ooko M, Wang'ondu R, et al. Effect of strikes by health workers on mortality between  
19 532 2010 and 2016 in Kilifi, Kenya: a population-based cohort analysis. *Lancet Glob Health*  
20  
21 533 2019;7(7):e961-e67. doi: 10.1016/s2214-109x(19)30188-3 [published Online First: 2019/05/28]  
22  
23 534 14. Berkley JA, Lowe BS, Mwangi I, et al. Bacteremia among children admitted to a rural hospital in  
24  
25 535 Kenya. *N Engl J Med* 2005;352(1):39-47. doi: 10.1056/NEJMoa040275 [published Online First:  
26  
27 536 2005/01/07]  
28  
29  
30 537 15. Ministry of Health, Kenya. Basic Paediatric Protocols 4th ed, 2016.  
31  
32 538 [dataset] 16. Ngari M, Talbert A, Ouma N, et al. Replication Data for: Inpatient and post-discharge  
33  
34 539 mortality among young infants admitted to a rural Kenyan hospital.: Harvard Dataverse, June 9 2022.  
35  
36 540 <https://doi.org/10.7910/DVN/0XJVFX>  
37  
38  
39 541 17. Cuzick J. A Wilcoxon-type test for trend. *Stat Med* 1985;4(1):87-90. doi: 10.1002/sim.4780040112  
40  
41 542 18. Fine JP, Gray RJ. A Proportional Hazards Model for the Subdistribution of a Competing Risk. *J Am Stat*  
42  
43 543 *Assoc* 1999;94(446):496-509. doi: 10.1080/01621459.1999.10474144  
44  
45 544 19. Seale AC, Barsosio HC, Koech AC, et al. Embedding surveillance into clinical care to detect serious  
46  
47 545 adverse events in pregnancy. *Vaccine* 2015;33(47):6466-8. doi: 10.1016/j.vaccine.2015.07.086  
48  
49 546 [published Online First: 20150805]  
50  
51  
52  
53  
54  
55  
56  
57  
58  
59  
60

- 1  
2  
3 547 20. Papageorghiou AT, Kennedy SH, Salomon LJ, et al. The INTERGROWTH-21(st) fetal growth standards:  
4  
5 548 toward the global integration of pregnancy and pediatric care. *Am J Obstet Gynecol*  
6  
7 549 2018;218(2S):S630-S640. doi: 10.1016/j.ajog.2018.01.011 [published Online First: 2018/02/10]  
9  
10 550 21. Orangi S, Kairu A, Malla L, et al. Impact of free maternity policies in Kenya: an interrupted time-series  
11  
12 551 analysis. *BMJ Glob Health* 2021;6(6) doi: 10.1136/bmjgh-2020-003649  
13  
14 552 22. Njuguna P, Maitland K, Nyaguara A, et al. Observational study: 27 years of severe malaria  
15  
16 553 surveillance in Kilifi, Kenya. *BMC Med* 2019;17(1):124. doi: 10.1186/s12916-019-1359-9  
17  
18 554 [published Online First: 2019/07/10]  
20  
21 555 23. Hammitt LL, Etyang AO, Morpeth SC, et al. Effect of ten-valent pneumococcal conjugate vaccine on  
22  
23 556 invasive pneumococcal disease and nasopharyngeal carriage in Kenya: a longitudinal  
24  
25 557 surveillance study. *Lancet (London, England)* 2019;393(10186):2146-54. doi: 10.1016/s0140-  
26  
27 558 6736(18)33005-8 [published Online First: 20190415]  
29  
30 559 24. Munywoki J, Kagwanja N, Chuma J, et al. Tracking health sector priority setting processes and  
31  
32 560 outcomes for human resources for health, five-years after political devolution: a county-level  
33  
34 561 case study in Kenya. *Int J Equity Health* 2020;19(1):165. doi: 10.1186/s12939-020-01284-3  
35  
36 562 [published Online First: 20200921]  
38  
39 563 25. Nabwera HM, Wang D, Tongo OO, et al. Burden of disease and risk factors for mortality amongst  
40  
41 564 hospitalized newborns in Nigeria and Kenya. *PLoS One* 2021;16(1):e0244109. doi:  
42  
43 565 10.1371/journal.pone.0244109 [published Online First: 20210114]  
45  
46 566 26. Mduma E, Halidou T, Kaboré B, et al. Etiology of severe invasive infections in young infants in rural  
47  
48 567 settings in sub-Saharan Africa. *PLoS One* 2022;17(2):e0264322. doi:  
49  
50 568 10.1371/journal.pone.0264322 [published Online First: 20220225]  
51  
52  
53  
54  
55  
56  
57  
58  
59  
60



- 1  
2  
3 569 27. WHO Afro. Kenya now eliminates maternal and neonatal tetanus 2019 [Available from:  
4  
5 570 <https://www.afro.who.int/news/kenya-now-eliminates-maternal-and-neonatal-tetanus>  
6  
7 571 accessed February 2 2022.  
8  
9  
10 572 28. World Health Organization. Newborns: improving survival and well-being 2020 [Available from:  
11  
12 573 <https://www.who.int/news-room/fact-sheets/detail/newborns-reducing-mortality> accessed  
13  
14 574 May 13 2022.  
15  
16 575 29. Bhutta ZA, Das JK, Bahl R, et al. Can available interventions end preventable deaths in mothers,  
17  
18 576 newborn babies, and stillbirths, and at what cost? *Lancet (London, England)*  
19  
20 577 2014;384(9940):347-70. doi: 10.1016/s0140-6736(14)60792-3 [published Online First:  
21  
22 578 20140519]  
23  
24  
25 579 30. ThinkWell. A reivew of the Transforming Health Systems for Universal Care project in Kilifi County,  
26  
27 580 2021.  
28  
29  
30 581 31. Talbert A, Ngari M, Bauni E, et al. Mortality after inpatient treatment for diarrhea in children: a  
31  
32 582 cohort study. *BMC Med* 2019;17(1):20. doi: 10.1186/s12916-019-1258-0 [published Online First:  
33  
34 583 20190128]  
35  
36  
37 584 32. Mukasa O, Masanja H, DeSavigny D, et al. A cohort study of survival following discharge from  
38  
39 585 hospital in rural Tanzanian children using linked data of admissions with community-based  
40  
41 586 demographic surveillance. *Emerg Themes Epidemiol* 2021;18(1):4. doi: 10.1186/s12982-021-  
42  
43 587 00094-4 [published Online First: 20210318]  
44  
45  
46 588 33. Ngari MM, Fegan G, Mwangome MK, et al. Mortality after Inpatient Treatment for Severe  
47  
48 589 Pneumonia in Children: a Cohort Study. *Paediatric and perinatal epidemiology* 2017;31(3):233-  
49  
50 590 42. doi: 10.1111/ppe.12348 [published Online First: 2017/03/21]  
51  
52  
53 591

1  
2  
3  
4  
5  
6  
7  
8  
9  
10  
11  
12  
13  
14  
15  
16  
17  
18  
19  
20  
21  
22  
23  
24  
25  
26  
27  
28  
29  
30  
31  
32  
33  
34  
35  
36  
37  
38  
39  
40  
41  
42  
43  
44  
45  
46  
47  
48  
49  
50  
51  
52  
53  
54  
55  
56  
57  
58  
59  
60

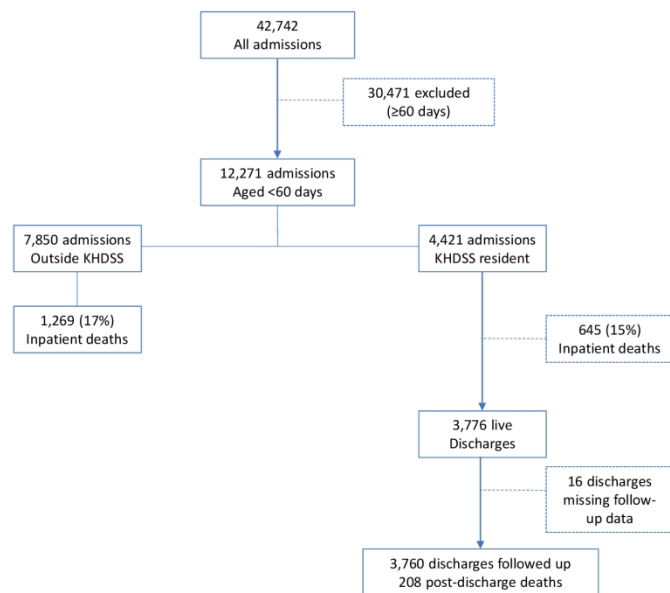

275x190mm (200 x 200 DPI)

1  
2  
3  
4  
5  
6  
7  
8  
9  
10  
11  
12  
13  
14  
15  
16  
17  
18  
19  
20  
21  
22  
23  
24  
25  
26  
27  
28  
29  
30  
31  
32  
33  
34  
35  
36  
37  
38  
39  
40  
41  
42  
43  
44  
45  
46  
47  
48  
49  
50  
51  
52  
53  
54  
55  
56  
57  
58  
59  
60

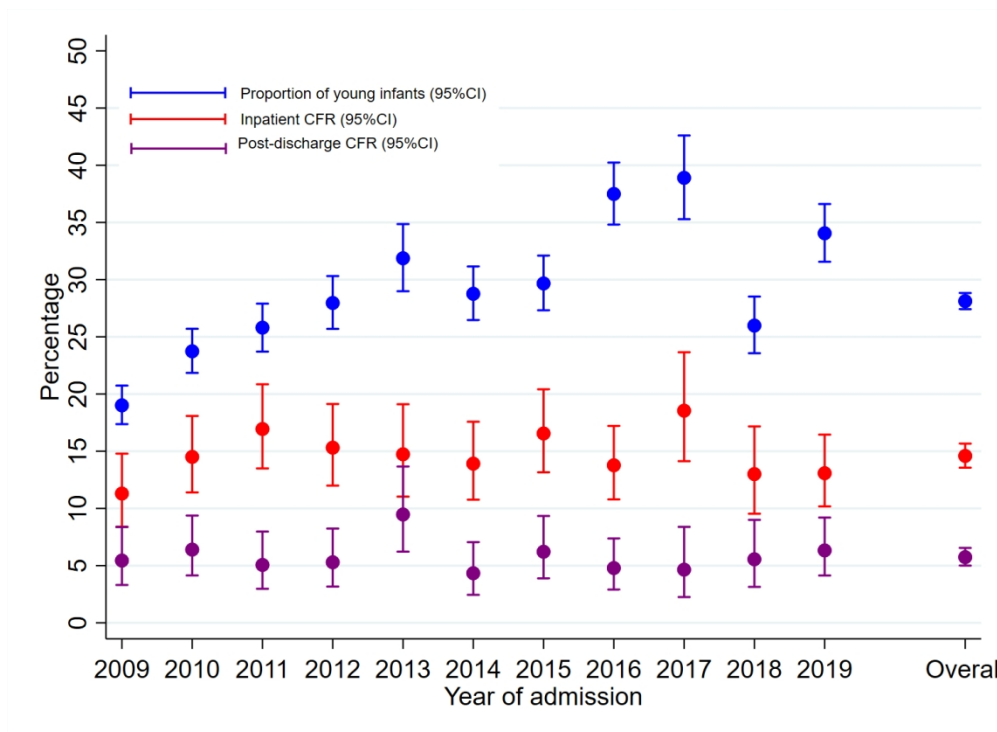

547x398mm (72 x 72 DPI)

1  
2  
3  
4  
5  
6  
7  
8  
9  
10  
11  
12  
13  
14  
15  
16  
17  
18  
19  
20  
21  
22  
23  
24  
25  
26  
27  
28  
29  
30  
31  
32  
33  
34  
35  
36  
37  
38  
39  
40  
41  
42  
43  
44  
45  
46  
47  
48  
49  
50  
51  
52  
53  
54  
55  
56  
57  
58  
59  
60

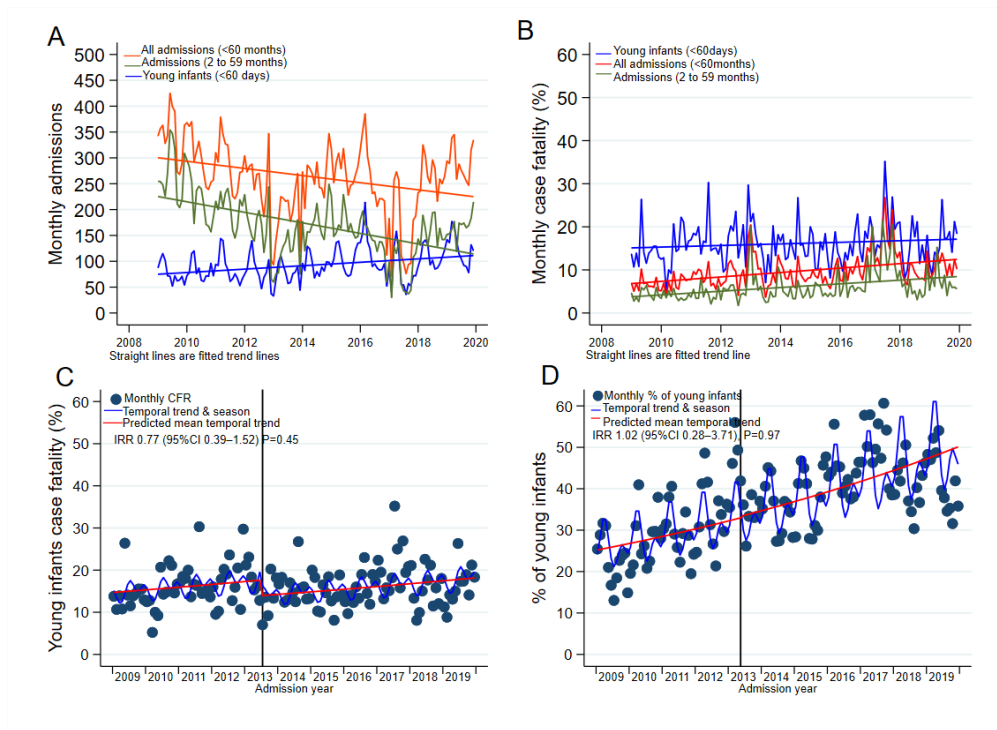

399x290mm (72 x 72 DPI)

1  
2  
3 **Supplementary materials**  
4

5 **Table of Contents**

|                                                                                                                                                                                                                         |           |
|-------------------------------------------------------------------------------------------------------------------------------------------------------------------------------------------------------------------------|-----------|
| 6 Table S1. List of health workers strikes during study period.                                                                                                                                                         | Page<br>2 |
| 7 Table S2. Proportion of missing data                                                                                                                                                                                  | 3         |
| 8 Table S3 Pathogens isolated from blood and CSF cultures of young infants resident in<br>9 KHDSS during inpatient period.                                                                                              | 4         |
| 10 Table S4. Annual admissions and case fatality ratios                                                                                                                                                                 | 5         |
| 11 Table S5. Univariate analysis of admission features associated with inpatient deaths.                                                                                                                                | 6,7       |
| 12 Table S6. Multivariable regression analysis of factors associated with inpatient<br>13 mortality (single vs multiple admissions).                                                                                    | 8,9       |
| 14 Table S7. Estimated causes of post-discharge deaths during readmission at KCH (67<br>15 deaths).                                                                                                                     | 10        |
| 16 Table S8. Univariate analysis of admission features associated with post-discharge<br>17 deaths.                                                                                                                     | 11,12     |
| 18 Table S9. Univariate analysis of admission features associated with inpatient deaths<br>19 among babies born at KCH only.                                                                                            | 13,14     |
| 20 Table S10. Multivariable regression analysis of factors associated with inpatient and<br>21 post-discharge mortality among children born at KCH only.                                                                | 15        |
| 22 Figure S1. A: Monthly all young infant admissions, B: all admissions (<60 months<br>23 old), C: all admissions (<60 months old) case fatality and D: 2–59 months old case<br>24 fatality before and after July 2013. | 16        |

25  
26  
27  
28  
29  
30  
31  
32  
33  
34  
35  
36  
37  
38  
39  
40  
41  
42  
43  
44  
45  
46  
47  
48  
49  
50  
51  
52  
53  
54  
55  
56  
57  
58  
59  
60

Table S1. List of health workers strikes during study period.

| Strike dates                       | Health workers on strike | Duration of strike in days |
|------------------------------------|--------------------------|----------------------------|
| 5 to 13 December 2011              | Doctors                  | 9                          |
| 1 to 15 March 2012                 | Nurses                   | 15                         |
| 13 September to 4 October 2012     | Doctors                  | 22                         |
| 3 December 2012 to 13 January 2013 | Nurses                   | 42                         |
| 16 January to 11 February 2013     | Nurses                   | 26                         |
| 10 to 23 December 2013             | Doctors & nurses         | 14                         |
| 5 to 14 December 2016              | Nurses                   | 11                         |
| 5 December 2016 to 15 March 2017   | Doctors                  | 102                        |
| 5 June to 2 November 2017          | Nurses                   | 150                        |

For peer review only

Table S2. Proportion of missing data

| <b>N=4,421</b>                    | <b>N missing</b> | <b>% missing</b> |
|-----------------------------------|------------------|------------------|
| <b>Demographics</b>               |                  |                  |
| Age in days                       | 0                |                  |
| Sex (female)                      | 0                |                  |
| BCG scar                          | 76               | 1.7              |
| Reported born premature           | 321              | 7.3              |
| Reported low birth weight         | 322              | 7.3              |
| <b>Anthropometry</b>              |                  |                  |
| Weight (kg)                       | 43               | 1.0              |
| MUAC (cm)                         | 126              | 2.9              |
| <b>Clinical features</b>          |                  |                  |
| Axillary temperature              | 34               | 0.8              |
| Tachypnea                         | 208              | 4.7              |
| Tachycardia                       | 43               | 1.0              |
| Hypoxia (SaO <sub>2</sub> <90%)   | 20               | 0.5              |
| Lower chest wall indrawing        | 68               | 1.5              |
| Wheeze                            | 69               | 1.6              |
| Stridor                           | 71               | 1.6              |
| Breathing difficulty              | 64               | 1.5              |
| Cyanosis                          | 70               | 1.6              |
| Capillary refill $\geq$ 2 seconds | 34               | 0.8              |
| Temperature gradient              | 81               | 1.8              |
| Weak pulse                        | 71               | 1.6              |
| Lethargy                          | 70               | 1.6              |
| Impaired consciousness            | 70               | 1.6              |
| Bulging fontanel                  | 72               | 1.6              |
| Stiff neck                        | 71               | 1.6              |
| Convulsions                       | 64               | 1.5              |
| Sunken eyes                       | 73               | 1.7              |
| Reduced skin turgor               | 71               | 1.6              |
| Pallor                            | 70               | 1.6              |
| <b>Laboratory features</b>        |                  |                  |
| HIV antibody positive             | 756              | 17               |
| Malaria slide positive            | 372              | 8.4              |
| Bacteraemia                       | 2281             | 52               |
| Haemoglobin                       | 448              | 10               |
| WBC                               | 449              | 10               |
| Platelets                         | 448              | 10               |
| Blood glucose (mmols/L)           | 1433             | 32               |

Table S3 Pathogens isolated from blood and CSF cultures of young infants resident in KHDSS during inpatient period.

| Blood culture Isolates                       |         | CSF culture isolates             |         |
|----------------------------------------------|---------|----------------------------------|---------|
| Pathogen (N=178)                             | No. (%) | Pathogen (N=24)                  | No. (%) |
| <i>Klebsiella pneumoniae</i>                 | 53 (30) | <i>Escherichia coli</i>          | 6 (25)  |
| <i>Escherichia coli</i>                      | 25 (14) | Group B Streptococcus            | 6 (25)  |
| <i>Staphylococcus aureus</i>                 | 22 (12) | <i>Klebsiella pneumoniae</i>     | 3 (13)  |
| Group B Streptococcus                        | 19 (11) | <i>Streptococcus pneumoniae</i>  | 3 (13)  |
| Non-typhoidal Salmonella species             | 9 (5.1) | <i>Enterobacter cloacae</i>      | 3 (13)  |
| <i>Enterobacter cloacae</i>                  | 8 (4.5) | Non-typhoidal Salmonella species | 2 (8.2) |
| <i>Pseudomonas aeruginosa</i>                | 6 (3.4) | <i>Acinetobacter lwoffii</i>     | 1 (4.2) |
| <i>Streptococcus pneumoniae</i>              | 5 (2.8) |                                  |         |
| <i>Streptococcus pyogenes</i>                | 3 (1.7) |                                  |         |
| Acinetobacter species                        | 3 (1.7) |                                  |         |
| <i>Aeromonas hydrophila</i>                  | 3 (1.7) |                                  |         |
| Group A Streptococcus                        | 3 (1.7) |                                  |         |
| <i>Serratia marcescens</i>                   | 2 (1.1) |                                  |         |
| <i>Acinetobacter calcoaceticus/baumannii</i> | 2 (1.1) |                                  |         |
| <i>Acinetobacter lwoffii</i>                 | 1 (0.6) |                                  |         |
| <i>Aeromonas sobria</i>                      | 1 (0.6) |                                  |         |
| <i>Chryseobacterium indologenes</i>          | 1 (0.6) |                                  |         |
| <i>Enterobacter aerogenes</i>                | 1 (0.6) |                                  |         |
| Enterococci species                          | 1 (0.6) |                                  |         |
| <i>Haemophilus influenzae</i>                | 1 (0.6) |                                  |         |
| <i>Proteus mirabilis</i>                     | 1 (0.6) |                                  |         |

CSF; cerebrospinal fluid, Out of the 33 Meningitis cases, only the 24 presented had positive CSF culture.



Table S4. Annual admissions and case fatality ratios (CFR).

| Admissions/Year                 | 2009 | 2010 | 2011 | 2012 | 2013 | 2014 | 2015 | 2016 | 2017 | 2018 | 2019 |
|---------------------------------|------|------|------|------|------|------|------|------|------|------|------|
| <60 days                        | 407  | 455  | 425  | 418  | 319  | 424  | 429  | 472  | 275  | 323  | 474  |
| 2 to 59 months                  | 1734 | 1462 | 1222 | 1177 | 682  | 1050 | 1017 | 787  | 432  | 920  | 918  |
| Proportion of YI admissions     | 19%  | 24%  | 26%  | 28%  | 32%  | 29%  | 30%  | 37%  | 39%  | 26%  | 34%  |
| YI inpatient deaths             | 46   | 66   | 72   | 64   | 47   | 59   | 71   | 65   | 51   | 42   | 62   |
| YI inpatient CFR                | 11%  | 15%  | 17%  | 15%  | 15%  | 14%  | 17%  | 14%  | 19%  | 13%  | 13%  |
| YI post-discharge 1-year deaths | 19   | 24   | 17   | 18   | 25   | 15   | 21   | 19   | 10   | 15   | 25   |
| YI Post-discharge 1- year CFR   | 5.4% | 6.4% | 5.1% | 5.3% | 9.5% | 4.3% | 6.2% | 4.8% | 4.7% | 5.6% | 6.3% |

Table S5. Univariate analysis of admission features associated with inpatient deaths.

| N=4,421                         | Deaths<br>(N=645)<br>N (%) | Crude SHR        | P-value | Scaled<br>Schoenfeld<br>residuals<br>P-value |
|---------------------------------|----------------------------|------------------|---------|----------------------------------------------|
| <b>Demographics</b>             |                            |                  |         |                                              |
| Age in days                     |                            |                  |         |                                              |
| 0 to 2                          | 511 (19)                   | 3.31 (2.39–4.58) | <0.001  | 0.14                                         |
| 3 to 7                          | 56 (12)                    | 2.07 (1.38–3.11) | <0.001  |                                              |
| 8 to 28                         | 40 (6.8)                   | 1.15 (0.74–1.78) | 0.54    |                                              |
| >28                             | 38 (6.0)                   | Reference        |         |                                              |
| Sex (female)                    | 268 (14)                   | 0.99 (0.91–1.09) | 0.93    | 0.77                                         |
| Reported born premature         | 294 (29)                   | 2.53 (2.32–3.77) | <0.001  | 0.06                                         |
| Reported low birth weight       | 222 (38)                   | 3.25 (2.97–3.56) | <0.001  | 0.18                                         |
| Born at KCH                     |                            |                  |         |                                              |
| Yes                             | 382 (14)                   | Reference        |         |                                              |
| No                              | 263 (16)                   | 1.13 (0.97–1.32) | 0.12    | 0.61                                         |
| <b>Anthropometry</b>            |                            |                  |         |                                              |
| Weight (kg)                     |                            |                  |         |                                              |
| <1.5                            | 213 (38)                   | 4.95 (4.13–5.93) | <0.001  | 0.09                                         |
| 1.5 to <2.5                     | 174 (15)                   | 1.86(1.53–2.26)  | <0.001  |                                              |
| ≥2.5                            | 229 (8.5)                  | Reference        |         |                                              |
| Missing weight                  | 29 (67)                    | 10.7 (7.60–14.9) | <0.001  |                                              |
| MUAC (cm)                       |                            |                  |         |                                              |
| <9.0                            | 333 (25)                   | 3.57 (3.07–4.15) | <0.001  | 0.08                                         |
| 9 to 10                         | 106 (12)                   | 1.73 (1.45–2.07) | <0.001  |                                              |
| 10 to 11                        | 96 (9.3)                   | 1.48 (1.24–1.77) | <0.001  |                                              |
| ≥11                             | 75 (7.1)                   | Reference        |         |                                              |
| Missing MUAC                    | 35 (28)                    | 3.89 (3.02–5.00) | <0.001  |                                              |
| <b>Clinical features</b>        |                            |                  |         |                                              |
| Axillary temperature            |                            |                  |         |                                              |
| <36°C                           | 390 (29)                   | 3.13 (2.82–3.47) | <0.001  | 0.34                                         |
| 36 to 37.5°C                    | 159 (9.3)                  | Reference        |         |                                              |
| >37.5°C                         | 84 (6.3)                   | 0.77 (0.67–0.88) | <0.001  |                                              |
| Missing temperature             | 12 (35)                    | 3.78 (2.65–5.39) | <0.001  |                                              |
| Respiratory rate/min            |                            |                  |         |                                              |
| Bradypnoea                      | 108 (57)                   | 6.09 (4.98–7.46) | <0.001  | 0.71                                         |
| Normal                          | 329 (12)                   | Reference        |         |                                              |
| Tachypnoea                      | 197 (13)                   | 1.07 (0.90–1.27) | 0.45    |                                              |
| Missing                         | 11 (11)                    | 0.91 (0.51–1.65) | 0.76    |                                              |
| Heart rate/min                  |                            |                  |         |                                              |
| Bradycardia                     | 74 (47)                    | 4.05 (3.21–5.11) | <0.001  | 0.50                                         |
| Normal                          | 403 (14)                   | Reference        |         |                                              |
| Tachycardia                     | 163 (12)                   | 0.88 (0.73–1.05) | 0.15    |                                              |
| Missing                         | 5 (23)                     | 1.68 (0.72–3.93) | 0.23    |                                              |
| Hypoxia (SaO <sub>2</sub> <90%) | 309 (33)                   | 3.91 (3.58–4.26) | <0.001  | 0.48                                         |
| Lower chest wall indrawing      | 448 (22)                   | 2.86 (2.60–3.15) | <0.001  | 0.41                                         |
| Wheeze                          | 0                          | -                |         |                                              |

|                                                                                                           |          |                  |        |      |
|-----------------------------------------------------------------------------------------------------------|----------|------------------|--------|------|
| Stridor                                                                                                   | 6 (32)   | 1.48 (0.89–2.47) | 0.13   | 0.23 |
| Breathing difficulty                                                                                      | 481 (22) | 3.62 (3.26–4.02) | <0.001 | 0.28 |
| Cyanosis                                                                                                  | 98 (47)  | 4.01 (3.55–4.53) | <0.001 | 0.14 |
| Capillary refill >2 seconds                                                                               | 61 (58)  | 5.61 (4.41–7.14) | <0.001 | 0.54 |
| Temperature gradient                                                                                      | 98 (38)  | 2.85 (2.51–3.23) | <0.001 | 0.36 |
| Weak pulse                                                                                                | 108 (69) | 5.85 (5.21–6.57) | <0.001 | 0.71 |
| Lethargy                                                                                                  | 64 (20)  | 1.20 (1.04–1.40) | 0.02   | 0.34 |
| Impaired consciousness                                                                                    | 140 (56) | 5.43 (4.91–6.00) | <0.001 | 0.42 |
| Bulging fontanel                                                                                          | 6 (19)   | 1.34 (0.90–1.99) | 0.15   | 0.08 |
| Stiff neck                                                                                                | 4 (40)   | 2.08 (1.30–3.32) | 0.002  | 0.17 |
| Convulsions                                                                                               | 16 (8.1) | 0.75 (0.61–0.93) | 0.01   | 0.53 |
| Sunken eyes                                                                                               | 5 (11)   | 1.04 (0.69–1.56) | 0.85   | 0.52 |
| Reduced skin turgor                                                                                       | 21 (22)  | 1.18 (0.91–1.52) | 0.22   | 0.56 |
| Pallor                                                                                                    | 72 (33)  | 2.47 (2.15–2.83) | <0.001 | 0.63 |
| <b>Laboratory features</b>                                                                                |          |                  |        |      |
| Meningitis                                                                                                | 8 (24)   | 8.06 (3.96–16.4) | <0.001 | 0.13 |
| Anaemia (haemoglobin <11 g/dl)                                                                            | 50 (11)  | 0.67 (0.51–0.90) | 0.007  | 0.51 |
| HIV antibody positive                                                                                     | 29 (20)  | 1.39 (1.13–1.71) | 0.002  | 0.28 |
| Malaria slide positive                                                                                    | 0        | -                |        |      |
| Bacteraemia                                                                                               | 63 (37)  | 2.92 (2.10–4.06) | <0.001 | 0.13 |
| Blood glucose (mmols/L)                                                                                   |          |                  |        |      |
| <2.6                                                                                                      | 137 (16) | 1.18 (1.04–1.33) | 0.009  | 0.42 |
| 2.6 to 7.0                                                                                                | 229 (12) | Reference        |        |      |
| >7.0                                                                                                      | 71 (31)  | 2.85 (2.47–3.29) | <0.001 |      |
| Missing blood glucose                                                                                     | 208 (15) | 1.18 (1.06–1.32) | 0.002  |      |
| White blood cells (10 <sup>12</sup> cells/L)                                                              |          |                  |        |      |
| <4                                                                                                        | 14 (26)  | 2.43 (1.47–4.03) | 0.001  | 0.70 |
| 4-20                                                                                                      | 362 (11) | Reference        |        |      |
| >20                                                                                                       | 210 (30) | 2.97 (2.52–3.50) | <0.001 |      |
| Missing                                                                                                   | 59 (13)  | 1.19 (0.91–1.57) | 0.20   |      |
| Platelets (10 <sup>9</sup> cells/L)                                                                       |          |                  |        |      |
| <150                                                                                                      | 139 (24) | 1.89 (1.57–2.27) | <0.001 | 0.10 |
| ≥150                                                                                                      | 447 (13) | Reference        |        |      |
| Missing                                                                                                   | 59 (13)  | 1.01 (0.77–1.32) | 0.95   |      |
| SHR: sub-distribution hazard ratios; the SHR are from the Fine and Gray's proportional sub-hazards model. |          |                  |        |      |

Table S6. **Multivariable regression analysis of factors associated with inpatient mortality (single vs multiple admissions).**

|                                 | Multiple admissions (N=4421) |         | Single admissions (N=4272) |         |
|---------------------------------|------------------------------|---------|----------------------------|---------|
|                                 | Adjusted SHR*                | P-value | Adjusted SHR*              | P-value |
| <b>Demographics</b>             |                              |         |                            |         |
| Age in days                     |                              |         |                            |         |
| 0 to 2                          | 2.12 (1.46–3.06)             | <0.001  | 2.14 (1.49–3.10)           | <0.001  |
| 3 to 7                          | 3.88 (2.46–6.10)             | <0.001  | 3.92 (2.48–5.16)           | <0.001  |
| 8 to 28                         | 1.42 (0.90–2.25)             | 0.13    | 1.50 (0.95–2.38)           | 0.08    |
| >28                             | Reference                    |         | Reference                  |         |
| Sex (female)                    | 0.91 (0.78–1.07)             | 0.26    | 0.90 (0.77–1.06)           | 0.20    |
| <b>Anthropometry</b>            |                              |         |                            |         |
| Weight (kg)                     |                              |         |                            |         |
| <1.5                            | 2.16 (1.75–2.67)             | <0.001  | 2.26 (1.83–2.79)           | <0.001  |
| 1.5 to <2.5                     | 1.42 (1.16–1.74)             | 0.001   | 1.43 (1.17–1.76)           | <0.001  |
| ≥2.5                            | Reference                    |         | Reference                  |         |
| Missing weight                  | 3.85 (2.59–5.71)             | <0.001  | 3.78 (2.56–5.58)           | <0.001  |
| <b>Clinical features</b>        |                              |         |                            |         |
| Axillary temperature            |                              |         |                            |         |
| <36°C                           | 1.44 (1.17–1.78)             | 0.001   | 1.45 (1.17–1.79)           | 0.001   |
| 36 to 37.5°C                    | Reference                    |         | Reference                  |         |
| >37.5°C                         | 1.09 (0.84–1.41)             | 0.53    | 1.07 (0.83–1.39)           | 0.57    |
| Missing temperature             | 1.03 (0.38–2.75)             | 0.96    | 0.92 (0.33–2.51)           | 0.87    |
| Respiratory rate/min            |                              |         |                            |         |
| Bradypnoea                      | 1.45 (1.09–1.93)             | 0.01    | 1.44 (1.08–1.92)           | 0.01    |
| Normal                          | Reference                    |         | Reference                  |         |
| Tachypnoea                      | 0.80 (0.67–0.95)             | 0.01    | 0.79 (0.66–0.94)           | 0.009   |
| Missing                         | 1.51 (0.64–3.56)             | 0.34    | 1.48 (0.62–3.55)           | 0.38    |
| Heart rate/min                  |                              |         |                            |         |
| Bradycardia                     | 1.40 (1.08–1.82)             | 0.01    | 1.42 (1.09–1.85)           | 0.008   |
| Normal                          | Reference                    |         | Reference                  |         |
| Tachycardia                     | 1.14 (0.94–1.37)             | 0.18    | 1.15 (0.96–1.39)           | 0.14    |
| Missing                         | 0.41 (0.03–5.13)             | 0.49    | 0.45 (0.04–5.14)           | 0.52    |
| Hypoxia (SaO <sub>2</sub> <90%) | 1.62 (1.37–1.92)             | <0.001  | 1.60 (1.36–1.90)           | <0.001  |
| Capillary refill >2 seconds     | 1.34 (0.97–1.86)             | 0.08    | 1.31 (0.94–1.83)           | 0.11    |
| Lower chest wall indrawing      | 1.41 (1.14–1.75)             | 0.002   | 1.42 (1.14–1.77)           | 0.002   |
| Stridor                         | 1.93 (0.92–4.03)             | 0.08    | 1.85 (0.89–3.85)           | 0.10    |
| Breathing difficulty            | 1.45 (1.15–1.82)             | 0.001   | 1.44 (1.15–1.81)           | 0.002   |
| Weak pulse                      | 1.61 (1.19–2.17)             | 0.002   | 1.61 (1.18–2.18)           | 0.002   |
| Bulging fontanel                | 2.45 (0.91–6.65)             | 0.08    | 2.41 (0.90–6.55)           | 0.08    |
| Impaired consciousness          | 2.21 (1.72–2.84)             | <0.001  | 2.17 (1.68–2.78)           | <0.001  |
| Pallor                          | 1.30 (0.98–1.71)             | 0.07    | 1.28 (0.97–1.69)           | 0.08    |
| <b>Laboratory features</b>      |                              |         |                            |         |
| Meningitis                      | 5.45 (2.50–11.8)             | <0.001  | 5.18 (2.39–11.2)           | <0.001  |
| HIV antibody positive           | 1.15 (0.81–1.63)             | 0.43    | 1.14 (0.80–1.62)           | 0.47    |

|                                                                                                                                                                                                                                                                                                                                                                                                                                     |                  |        |                  |        |
|-------------------------------------------------------------------------------------------------------------------------------------------------------------------------------------------------------------------------------------------------------------------------------------------------------------------------------------------------------------------------------------------------------------------------------------|------------------|--------|------------------|--------|
| Bacteraemia                                                                                                                                                                                                                                                                                                                                                                                                                         | 2.21 (1.51–3.22) | <0.001 | 2.20 (1.51–3.20) | <0.001 |
| White blood cells ( $10^{12}$ cells/L)                                                                                                                                                                                                                                                                                                                                                                                              |                  |        |                  |        |
| <4                                                                                                                                                                                                                                                                                                                                                                                                                                  | 2.17 (1.30–3.62) | 0.003  | 2.11 (1.27–3.50) | 0.003  |
| 4-20                                                                                                                                                                                                                                                                                                                                                                                                                                | Reference        |        | Reference        |        |
| >20                                                                                                                                                                                                                                                                                                                                                                                                                                 | 1.71 (1.43–2.04) | <0.001 | 1.70 (1.43–2.03) | <0.001 |
| unavailable                                                                                                                                                                                                                                                                                                                                                                                                                         | 1.09 (0.82–1.44) | 0.57   | 1.06 (0.79–1.41) | 0.71   |
| <b>Model performance</b>                                                                                                                                                                                                                                                                                                                                                                                                            |                  |        |                  |        |
| Bootstrapped AUC (95% CI)                                                                                                                                                                                                                                                                                                                                                                                                           | 0.88 (0.86–0.89) |        | 0.88 (0.86–0.89) |        |
| SHR; sub-distribution hazard ratios; *the SHR are from the Fine and Gray's proportional sub-hazards model, AUC; area under receiver operating characteristics. Meningitis: positive CSF culture, or positive CSF microscopy, or positive CSF antigen test, or elevated CSF WBC count ( $\geq 20$ in young infants aged 0-28 days OR, $\geq 10$ in young infants aged 29-59 days) PLUS a positive blood culture for a known pathogen |                  |        |                  |        |

Table S7. Estimated causes of post-discharge deaths during readmission at KCH (67 deaths).

| <b>Index admission diagnosis (N=67)</b> | <b>No. (%)</b> | <b>Causes of post-discharge deaths (N=67)</b> | <b>No. (%)</b> |
|-----------------------------------------|----------------|-----------------------------------------------|----------------|
| Neonatal sepsis                         | 15 (22)        | Neonatal sepsis                               | 16 (24)        |
| Preterm complications                   | 15 (22)        | Preterm complications                         | 15 (22)        |
| Heart disease-Congenital                | 9 (13)         | Heart disease-Congenital                      | 10 (15)        |
| Neonatal jaundice                       | 5 (7.5)        | Neonatal jaundice                             | 5 (7.4)        |
| Meningitis                              | 4 (6.0)        | Meningitis                                    | 5 (7.4)        |
| Birth asphyxia                          | 4 (6.0)        | Birth asphyxia                                | 5 (7.4)        |
| Lower respiratory tract infection       | 4 (6.0)        | Lower respiratory tract infection             | 4 (6.0)        |
| Encephalopathy - unknown                | 0              | Encephalopathy - unknown                      | 1 (1.5)        |
| Hydrocephalus                           | 1 (1.5)        | Hydrocephalus                                 | 1 (1.5)        |
| Malnutrition                            | 1 (1.5)        | None specified                                | 5 (7.4)        |
| None specified                          | 9 (13)         |                                               |                |

Index admission diagnosis and causes of death were assigned by treating clinician.

Table S8. Univariate analysis of admission features associated with post-discharge deaths.

| N=3625                                           | Deaths (N=208) | Crude HR         | P-value | Scaled Schoenfeld residuals P-value |
|--------------------------------------------------|----------------|------------------|---------|-------------------------------------|
| <b>Demographics</b>                              |                |                  |         |                                     |
| Age in days                                      |                |                  |         |                                     |
| 0 to 2                                           | 124 (5.6)      | 0.98 (0.67–1.44) | 0.92    | 0.10                                |
| 3 to 7                                           | 15 (3.7)       | 0.63 (0.34–1.16) | 0.14    |                                     |
| 8 to 28                                          | 36 (6.6)       | 1.17 (0.73–1.87) | 0.52    |                                     |
| >28                                              | 33 (5.5)       | Reference        |         |                                     |
| Sex (female)                                     | 89 (5.5)       | 0.98 (0.74–1.28) | 0.86    | 0.79                                |
| Reported born premature                          | 58 (8.0)       | 1.79 (1.32–2.44) | <0.001  | 0.07                                |
| Reported low birth weight                        | 33 (9.3)       | 1.99 (1.37–2.90) | <0.001  | 0.13                                |
| Born at KCH                                      |                |                  |         |                                     |
| Yes                                              | 102 (4.3)      | Reference        |         |                                     |
| No                                               | 106 (7.6)      | 1.75 (1.34–2.30) | <0.001  | 0.12                                |
| Length of hospitalization (days)-log transformed | -              | 1.96 (1.68–2.27) | <0.001  | 0.38                                |
| Discharged over weekend                          |                |                  |         |                                     |
| No                                               | 173 (5.7)      | Reference        |         |                                     |
| Yes                                              | 35 (4.8)       | 0.85 (0.59–1.23) | 0.39    | 0.16                                |
| Type of discharge                                |                |                  |         |                                     |
| Normal discharge                                 | 180 (4.9)      | Reference        |         | 0.75                                |
| Absconded                                        | 5 (12)         | 2.60 (1.07–6.33) | 0.04    |                                     |
| Transferred/referred                             | 23 (44)        | 11.8 (7.64–18.2) | <0.001  |                                     |
| <b>Anthropometry</b>                             |                |                  |         |                                     |
| Weight (kg)                                      |                |                  |         |                                     |
| <1.5                                             | 30 (8.5)       | 2.49 (1.65–3.77) | <0.001  | 0.17                                |
| 1.5 to <2.5                                      | 87 (9.2)       | 2.64 (1.97–3.54) | <0.001  |                                     |
| ≥2.5                                             | 91 (3.7)       | Reference        |         |                                     |
| Missing weight                                   | 0              | -                |         |                                     |
| MUAC (cm)                                        |                |                  |         |                                     |
| <9.0                                             | 88 (8.8)       | 4.05 (2.56–6.41) | <0.001  | 0.17                                |
| 9 to 10                                          | 44 (5.8)       | 2.56 (1.55–4.24) | <0.001  |                                     |
| 10 to 11                                         | 42 (4.5)       | 1.92 (1.15–3.18) | 0.01    |                                     |
| ≥11                                              | 23 (2.4)       | Reference        |         |                                     |
| Missing MUAC                                     | 11 (12)        | 5.83 (2.84–12.0) | <0.001  |                                     |
| <b>Clinical features</b>                         |                |                  |         |                                     |
| Axillary temperature                             |                |                  |         |                                     |
| <36°C                                            | 78 (8.1)       | 1.45 (1.07–1.96) | 0.02    | 0.80                                |
| 36 to 37.5°C                                     | 88 (5.7)       | Reference        |         |                                     |
| >37.5°C                                          | 41 (3.3)       | 0.57 (0.40–0.83) | 0.003   |                                     |
| Missing temperature                              | 1 (5.0)        | 0.99 (0.14–7.12) | 0.99    |                                     |
| Respiratory rate/min                             |                |                  |         |                                     |
| Bradypnoea                                       | 7 (8.8)        | 1.92 (0.90–4.13) | 0.09    | 0.30                                |
| Normal                                           | 108 (4.7)      | Reference        |         |                                     |
| Tachypnoea                                       | 87 (6.8)       | 1.44 (1.09–1.92) | 0.01    |                                     |
| Missing                                          | 6 (7.2)        | 1.65 (0.72–3.76) | 0.23    |                                     |
| Heart rate/min                                   |                |                  |         |                                     |

|                                                                        |           |                  |       |      |
|------------------------------------------------------------------------|-----------|------------------|-------|------|
| Bradycardia                                                            | 9 (11)    | 2.10 (1.07–4.13) | 0.03  | 0.73 |
| Normal                                                                 | 137 (5.5) | Reference        |       |      |
| Tachycardia                                                            | 62 (5.3)  | 0.97 (0.72–1.31) | 0.85  |      |
| Missing                                                                | 0         | -                |       |      |
| Hypoxia (SaO <sub>2</sub> <90%)                                        | 51 (8.2)  | 1.68 (1.23–2.31) | 0.001 | 0.54 |
| Lower chest wall indrawing                                             | 108 (6.8) | 1.54 (1.17–2.02) | 0.002 | 0.18 |
| Wheeze                                                                 | 2 (4.4)   | 0.77 (0.19–3.10) | 0.71  | 0.20 |
| Stridor                                                                | 0         | -                |       |      |
| Breathing difficulty                                                   | 109 (6.5) | 1.40 (1.07–1.85) | 0.02  | 0.26 |
| Cyanosis                                                               | 7 (6.3)   | 1.14 (0.54–2.43) | 0.73  | 0.17 |
| Capillary refill ≥2 seconds                                            | 4 (9.4)   | 1.81 (0.67–4.87) | 0.24  | 0.40 |
| Temperature gradient                                                   | 12 (7.5)  | 1.44 (0.80–2.57) | 0.23  | 0.22 |
| Weak pulse                                                             | 7 (15)    | 3.10 (1.46–6.59) | 0.003 | 0.38 |
| Lethargy                                                               | 14 (5.8)  | 1.06 (0.63–1.80) | 0.82  | 0.19 |
| Impaired consciousness                                                 | 6 (5.5)   | 0.98 (0.44–2.21) | 0.96  | 0.50 |
| Bulging fontanel                                                       | 4 (15)    | 3.04 (1.13–8.18) | 0.03  | 0.06 |
| Stiff neck                                                             | 1 (17)    | 2.84 (0.40–20.2) | 0.30  | 0.15 |
| Convulsions                                                            | 9 (5.0)   | 0.88 (0.46–1.75) | 0.75  | 0.31 |
| Sunken eyes                                                            | 6 (15)    | 3.31 (1.47–7.45) | 0.004 | 0.20 |
| Reduced skin turgor                                                    | 8 (11)    | 2.19 (1.08–4.43) | 0.03  | 0.20 |
| Pallor                                                                 | 15 (10)   | 2.09 (1.23–3.53) | 0.006 | 0.23 |
| <b>Laboratory features</b>                                             |           |                  |       |      |
| Meningitis                                                             | 4 (16)    | 3.98 (1.45–10.9) | 0.007 | 0.13 |
| Anaemia (haemoglobin <11 g/dl)                                         | 26 (6.2)  | 1.19 (0.79–1.80) | 0.41  | 0.68 |
| HIV antibody positive                                                  | 7 (6.2)   | 1.17 (0.55–2.49) | 0.69  | 0.76 |
| Malaria slide positive                                                 | 0         | -                |       |      |
| Bacteraemia                                                            | 10 (9.4)  | 1.02 (0.50–2.06) | 0.96  | 0.28 |
| Blood glucose (mmols/L)                                                |           |                  |       |      |
| <2.6                                                                   | 51 (6.9)  | 1.31 (0.92–1.85) | 0.13  | 0.25 |
| 2.6 to 7.0                                                             | 86 (5.3)  | Reference        |       |      |
| >7.0                                                                   | 10 (6.3)  | 1.21 (0.63–2.32) | 0.57  |      |
| Missing blood glucose                                                  | 61 (5.0)  | 0.95 (0.68–1.32) | 0.75  |      |
| White blood cells (10 <sup>12</sup> cells/L)                           |           |                  |       |      |
| <4                                                                     | 1 (2.5)   | 0.45 (0.06–3.20) | 0.42  | 0.79 |
| 4-20                                                                   | 157 (5.5) | Reference        |       |      |
| >20                                                                    | 29 (6.1)  | 1.10 (0.74–1.64) | 0.63  |      |
| Missing                                                                | 21 (5.4)  | 0.99 (0.63–1.56) | 0.97  |      |
| Platelets (10 <sup>9</sup> cells/L)                                    |           |                  |       |      |
| <150                                                                   | 38 (8.6)  | 1.69 (1.18–2.41) | 0.004 | 0.70 |
| ≥150                                                                   | 149 (5.1) | Reference        |       |      |
| Missing                                                                | 21 (5.4)  | 1.08 (0.68–1.70) | 0.75  |      |
| HR: hazard ratios; the HR are from the Cox proportional hazards model. |           |                  |       |      |



Table S9. Univariate regression analysis of factors associated with inpatient and post-discharge mortality among children born at KCH only.

| N=1,358                  | Deaths<br>(N=174)<br>N (%) | Crude SHR        | P-value | Scaled<br>Schoenfeld<br>residuals P-<br>value |
|--------------------------|----------------------------|------------------|---------|-----------------------------------------------|
| <b>Demographics</b>      |                            |                  |         |                                               |
| Age in days              |                            |                  |         |                                               |
| 0 to 2                   | 151 (15)                   | 2.48 (1.19–5.16) | 0.02    | 0.26                                          |
| 3 to 7                   | 8 (7.0)                    | 1.22 (0.45–3.30) | 0.69    |                                               |
| 8 to 28                  | 8 (6.8)                    | 1.21 (0.46–3.23) | 0.70    |                                               |
| >28                      | 7 (5.5)                    | Reference        |         |                                               |
| Sex (female)             | 84 (14)                    | 1.11 (0.83–1.48) | 0.50    | 0.31                                          |
| Born premature           | 101 (21)                   | 2.65 (1.97–3.56) | <0.001  | 0.10                                          |
| Born low birth weight    | 107 (21)                   | 2.74 (2.03–3.71) | <0.001  | 0.44                                          |
| <b>Anthropometry</b>     |                            |                  |         |                                               |
| Weight z score at birth  |                            |                  |         |                                               |
| <-2.0                    | 32 (17)                    | 1.49 (1.02–2.17) | 0.04    | 0.12                                          |
| ≥-2.0                    | 142 (12)                   | Reference        |         |                                               |
| MUAC (cm)                |                            |                  |         |                                               |
| <9.0                     | 97 (23)                    | 3.14 (2.05–4.83) | <0.001  | 0.17                                          |
| 9 to 10                  | 26 (9.9)                   | 1.26 (0.74–2.17) | 0.40    |                                               |
| 10 to 11                 | 25 (7.3)                   | 0.91 (0.53–1.57) | 0.73    |                                               |
| ≥11                      | 26 (7.9)                   | Reference        |         |                                               |
| Missing MUAC             | 0                          | -                |         |                                               |
| <b>Clinical features</b> |                            |                  |         |                                               |
| Axillary temperature     |                            |                  |         |                                               |
| <36°C                    | 113 (26)                   | 3.02 (2.13–4.27) | <0.001  | 0.30                                          |
| 36 to 37.5°C             | 41 (9.2)                   | Reference        |         |                                               |
| >37.5°C                  | 18 (3.9)                   | 0.42 (0.24–0.72) | 0.002   |                                               |
| Missing temperature      | 2 (50)                     | 6.90 (1.84–25.8) | 0.004   |                                               |
| Respiratory rate/min     |                            |                  |         |                                               |
| Bradypnoea               | 32 (52)                    | 6.44 (4.39–9.45) | <0.001  | 0.17                                          |
| Normal                   | 91 (10)                    | Reference        |         |                                               |
| Tachypnoea               | 50 (12)                    | 1.21 (0.86–1.69) | 0.28    |                                               |
| Missing                  | 1 (5.3)                    | 0.49 (0.07–3.37) | 0.47    |                                               |
| Heart rate/min           |                            |                  |         |                                               |
| Bradycardia              | 21 (43)                    | 4.76 (3.06–7.43) | <0.001  | 0.81                                          |
| Normal                   | 98 (10)                    | Reference        |         |                                               |
| Tachycardia              | 55 (15)                    | 1.48 (1.07–2.05) | 0.02    |                                               |

|                                                                                                           |          |                  |        |      |
|-----------------------------------------------------------------------------------------------------------|----------|------------------|--------|------|
| Missing                                                                                                   | 0        | -                |        |      |
| Hypoxia (SaO <sub>2</sub> <90%)                                                                           | 79 (29)  | 3.62 (2.71–4.83) | <0.001 | 0.81 |
| Lower chest wall indrawing                                                                                | 125 (21) | 3.57 (2.57–4.95) | <0.001 | 0.47 |
| Wheeze                                                                                                    | 0        | -                |        |      |
| Stridor                                                                                                   | 5 (63)   | 6.96 (3.09–15.7) | <0.001 | 0.60 |
| Breathing difficulty                                                                                      | 481 (22) | 5.40 (3.69–7.88) | <0.001 | 0.18 |
| Cyanosis                                                                                                  | 29 (48)  | 5.15 (3.54–7.50) | <0.001 | 0.18 |
| Capillary refill >2 seconds                                                                               | 14 (64)  | 7.22 (4.43–11.7) | <0.001 | 0.58 |
| Temperature gradient                                                                                      | 26 (30)  | 2.69 (1.81–4.01) | <0.001 | 0.49 |
| Weak pulse                                                                                                | 25 (58)  | 6.52 (4.44–9.56) | <0.001 | 0.77 |
| Lethargy                                                                                                  | 17 (16)  | 1.29 (0.79–2.10) | 0.31   | 0.56 |
| Impaired consciousness                                                                                    | 48 (52)  | 6.75 (4.93–9.24) | <0.001 | 0.13 |
| Bulging fontanel                                                                                          | 1 (25)   | 2.03 (0.31–13.2) | 0.46   | 0.59 |
| Stiff neck                                                                                                | 1 (5.3)  | -                |        | 0.31 |
| Convulsions                                                                                               | 1 (2.9)  | 0.21 (0.03–1.48) | 0.12   | 0.21 |
| Sunken eyes                                                                                               | 1 (17)   | 1.35 (0.19–9.77) | 0.77   | 0.57 |
| Reduced skin turgor                                                                                       | 1 (5.9)  | 0.44 (0.06–3.19) | 0.42   | 0.56 |
| Pallor                                                                                                    | 21 (42)  | 4.00 (2.61–6.12) | <0.001 | 0.59 |
| <b>Laboratory features</b>                                                                                |          |                  |        |      |
| Meningitis                                                                                                | 2 (29)   | 9.95 (2.37–41.8) | 0.002  | 0.12 |
| Haemoglobin <11 g/dl                                                                                      | 11 (13)  | 0.92 (0.51–1.66) | 0.78   | 0.25 |
| HIV antibody positive                                                                                     | 8 (21)   | 1.68 (0.84–3.33) | 0.14   | 0.14 |
| Malaria slide positive                                                                                    | 0        | -                |        |      |
| Bacteraemia                                                                                               | 14 (33)  | 3.00 (1.48–5.95) | 0.002  | 0.20 |
| Blood glucose (mmols/l)                                                                                   |          |                  |        |      |
| <2.6                                                                                                      | 33 (12)  | 1.02 (0.67–1.56) | 0.91   | 0.95 |
| 2.6 to 7.0                                                                                                | 58 (12)  | Reference        |        |      |
| >7.0                                                                                                      | 11 (21)  | 1.88 (1.00–3.54) | 0.05   |      |
| Missing blood glucose                                                                                     | 72 (13)  | 1.11 (0.79–1.56) | 0.53   |      |
| White blood cells (10 <sup>12</sup> cells/L)                                                              |          |                  |        |      |
| <4                                                                                                        | 3 (33)   | 3.52 (1.25–9.91) | 0.02   | 0.08 |
| 4-20                                                                                                      | 100 (10) | Reference        |        |      |
| >20                                                                                                       | 59 (28)  | 3.10 (2.27–4.24) | <0.001 |      |
| Missing                                                                                                   | 12 (8.2) | 0.82 (0.45–1.48) | 0.50   |      |
| Platelets (10 <sup>9</sup> cells/L)                                                                       |          |                  |        |      |
| <150                                                                                                      | 35 (20)  | 1.69 (1.18–2.44) | 0.005  | 0.50 |
| ≥150                                                                                                      | 127 (12) | Reference        |        |      |
| Missing                                                                                                   | 12 (8.2) | 0.66 (0.37–1.19) | 0.17   |      |
| SHR; sub-distribution hazard ratios; the SHR are from the Fine and Gray's proportional sub-hazards model. |          |                  |        |      |

Table S10. Multivariable regression analysis of factors associated with inpatient and post-discharge mortality among children born at KCH only.

|                                                                                                                                                                                                                                                                                               | Inpatient analysis |         | Post-discharge analysis |         |
|-----------------------------------------------------------------------------------------------------------------------------------------------------------------------------------------------------------------------------------------------------------------------------------------------|--------------------|---------|-------------------------|---------|
|                                                                                                                                                                                                                                                                                               | Adjusted SHR*      | P-value | Adjusted HR             | P-value |
| <b>Demographics</b>                                                                                                                                                                                                                                                                           |                    |         |                         |         |
| Age in days                                                                                                                                                                                                                                                                                   |                    |         |                         |         |
| 0 to 2                                                                                                                                                                                                                                                                                        | 3.03 (1.33–6.94)   | 0.009   | ¶                       |         |
| 3 to 7                                                                                                                                                                                                                                                                                        | 4.08 (1.48–11.3)   | 0.007   | ¶                       |         |
| 8 to 28                                                                                                                                                                                                                                                                                       | 2.57 (0.90–7.29)   | 0.08    | ¶                       |         |
| >28                                                                                                                                                                                                                                                                                           | Reference          |         |                         |         |
| <b>Anthropometry</b>                                                                                                                                                                                                                                                                          |                    |         |                         |         |
| Low birth weight                                                                                                                                                                                                                                                                              | 1.55 (1.10–2.20)   | 0.01    | 2.76 (1.30–5.82)        | 0.008   |
| <b>Clinical features</b>                                                                                                                                                                                                                                                                      |                    |         |                         |         |
| Axillary temperature                                                                                                                                                                                                                                                                          |                    |         |                         |         |
| <36°C                                                                                                                                                                                                                                                                                         | 1.49 (0.97–2.28)   | 0.07    | 1.44 (0.71–2.95)        | 0.31    |
| 36 to 37.5°C                                                                                                                                                                                                                                                                                  | Reference          |         | Reference               |         |
| >37.5°C                                                                                                                                                                                                                                                                                       | 0.67 (0.39–1.13)   | 0.13    | 0.22 (0.06–0.78)        | 0.02    |
| Missing temperature                                                                                                                                                                                                                                                                           | 3.37 (0.85–13.4)   | 0.09    | 0.48 (0.09–2.64)        | 0.40    |
| Respiratory rate/min                                                                                                                                                                                                                                                                          |                    |         |                         |         |
| Bradypnoea                                                                                                                                                                                                                                                                                    | 2.22 (1.36–3.63)   | 0.001   | ¶                       |         |
| Normal                                                                                                                                                                                                                                                                                        | Reference          |         |                         |         |
| Tachypnoea                                                                                                                                                                                                                                                                                    | 0.78 (0.55–1.11)   | 0.17    | ¶                       |         |
| Missing                                                                                                                                                                                                                                                                                       | -                  |         |                         |         |
| Heart rate/min                                                                                                                                                                                                                                                                                |                    |         |                         |         |
| Bradycardia                                                                                                                                                                                                                                                                                   | 1.88 (1.14–3.12)   | 0.01    | 3.56 (1.14–11.2)        | 0.03    |
| Normal                                                                                                                                                                                                                                                                                        | Reference          |         | Reference               |         |
| Tachycardia                                                                                                                                                                                                                                                                                   | 1.57 (1.11–2.21)   | 0.01    | 1.54 (0.77–3.07)        | 0.22    |
| Missing                                                                                                                                                                                                                                                                                       | 0.25 (0.02–3.00)   | 0.28    | -                       |         |
| Hypoxia (SaO <sub>2</sub> <90%)                                                                                                                                                                                                                                                               | 1.60 (1.14–2.24)   | 0.006   | ¶                       |         |
| Lower chest wall indrawing                                                                                                                                                                                                                                                                    | 1.42 (0.91–2.22)   | 0.12    | ¶                       |         |
| Stridor                                                                                                                                                                                                                                                                                       | 3.74 (1.87–7.49)   | <0.001  | ¶                       |         |
| Breathing difficulty                                                                                                                                                                                                                                                                          | 2.13 (1.25–3.64)   | 0.005   | ¶                       |         |
| Capillary refill >2 seconds                                                                                                                                                                                                                                                                   | 1.94 (1.06–3.56)   | 0.03    | ¶                       |         |
| Weak pulse                                                                                                                                                                                                                                                                                    | 2.15 (1.27–3.65)   | 0.004   | 1.60 (0.24–10.5)        | 0.63    |
| Pallor                                                                                                                                                                                                                                                                                        | 2.36 (1.46–3.83)   | <0.001  | ¶                       |         |
| <b>Laboratory features</b>                                                                                                                                                                                                                                                                    |                    |         |                         |         |
| Bacteraemia                                                                                                                                                                                                                                                                                   | 2.50 (1.20–5.22)   | 0.02    | 0.21 (0.03–1.81)        | 0.16    |
| <b>Model performance</b>                                                                                                                                                                                                                                                                      |                    |         |                         |         |
| AUC (95% CI)                                                                                                                                                                                                                                                                                  | 0.85 (0.82–0.88)   |         | 0.79 (0.72–0.85)        |         |
| SHR; sub-distribution hazard ratios; *the SHR are from the Fine and Gray's proportional subhazards model, HR-Hazard ratio from the Proportional Cox regression model, ¶; variables not selected for inclusion in the multivariable model, AUC; area under receiver operating characteristics. |                    |         |                         |         |

Figure S1. **A: Monthly all young infant admissions, B: all admissions (<60 months old), C: all admissions (<60 months old) case fatality and D: 2–59 months old case fatality before and after July 2013.**

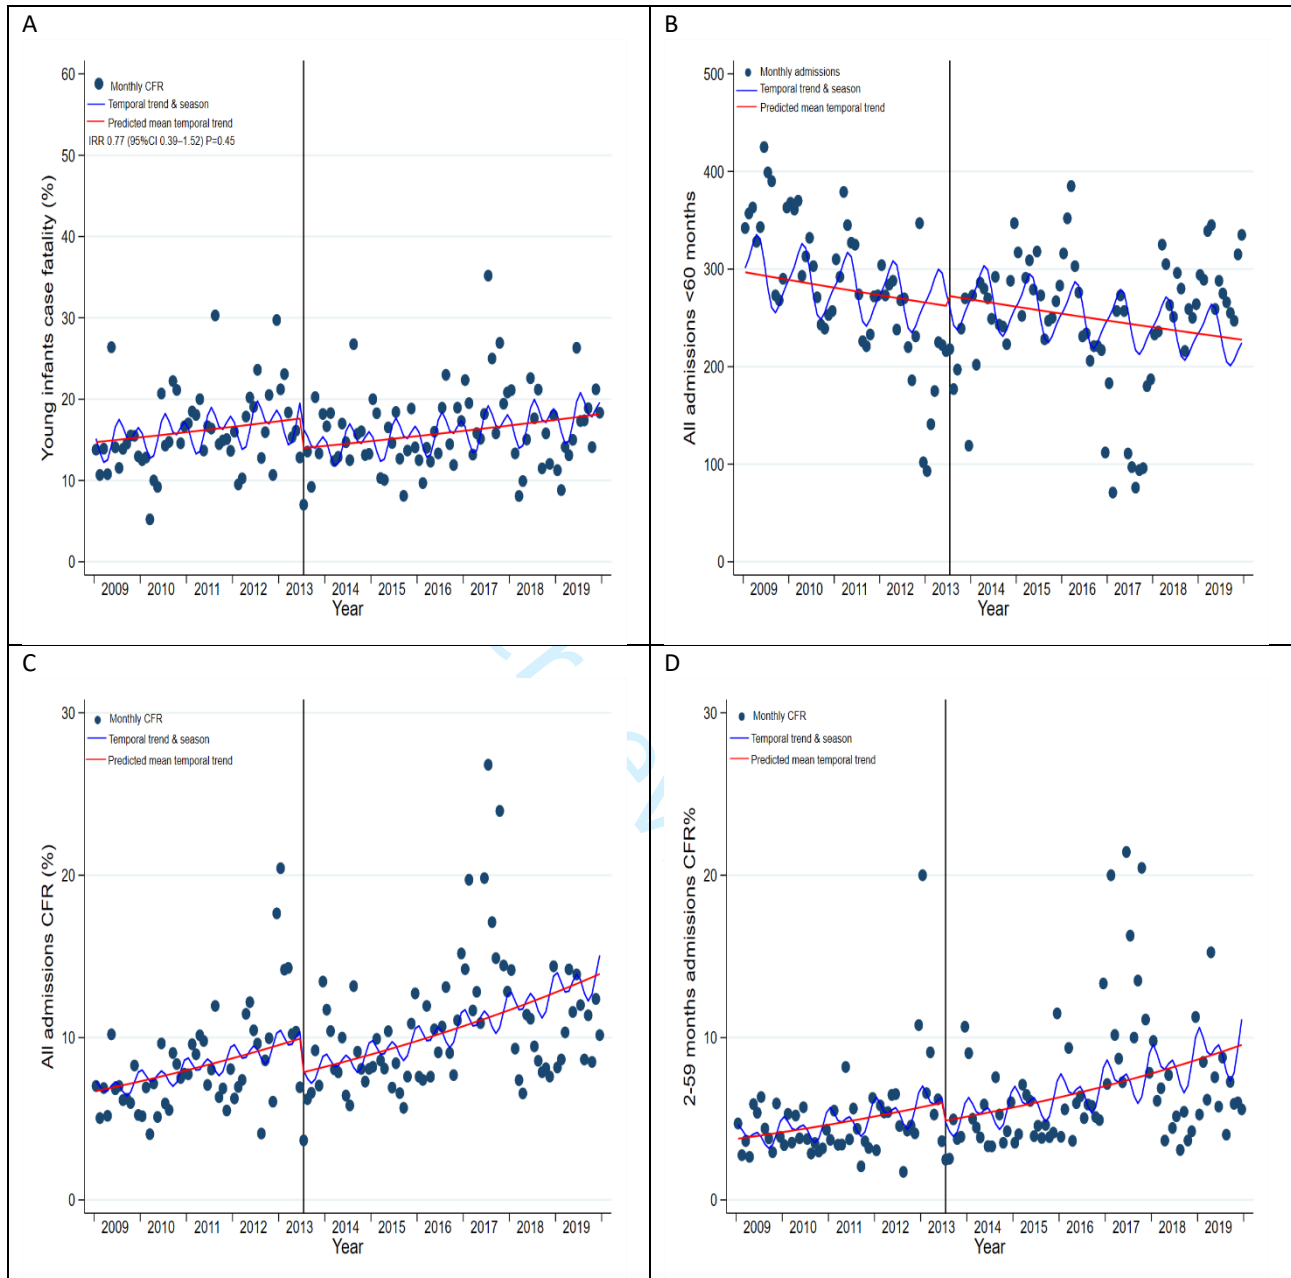

Supplement: bmjopen-2022-067482.draft_revisions.pdf [file bmjopen-2022-067482.draft_revisions.pdf]
