# Supplementary material for: Trends in inpatient and post-discharge mortality among young infants admitted to Kilifi County Hospital, Kenya: a retrospective cohort study
Source: PubMed Central journal article supplement (PMC9835934; doi:10.1136/bmjopen-2022-067482), 2023-01-11

**Supplementary materials****Table of Contents**

|                                                                                                                                                                                                          |           |
|----------------------------------------------------------------------------------------------------------------------------------------------------------------------------------------------------------|-----------|
| Table S1. List of health workers strikes during study period.                                                                                                                                            | Page<br>2 |
| Table S2. Proportion of missing data                                                                                                                                                                     | 3         |
| Table S3 Pathogens isolated from blood and CSF cultures of young infants resident in KHDSS during inpatient period.                                                                                      | 4         |
| Table S4. Annual admissions and case fatality ratios                                                                                                                                                     | 5         |
| Table S5. Univariate analysis of admission features associated with inpatient deaths.                                                                                                                    | 6,7       |
| Table S6. Multivariable regression analysis of factors associated with inpatient mortality (single vs multiple admissions).                                                                              | 8,9       |
| Table S7. Estimated causes of post-discharge deaths during readmission at KCH (67 deaths).                                                                                                               | 10        |
| Table S8. Univariate analysis of admission features associated with post-discharge deaths.                                                                                                               | 11,12     |
| Table S9. Univariate analysis of admission features associated with inpatient deaths among babies born at KCH only.                                                                                      | 13,14     |
| Table S10. Multivariable regression analysis of factors associated with inpatient and post-discharge mortality among children born at KCH only.                                                          | 15        |
| Figure S1. A: Monthly all young infant admissions, B: all admissions (<60 months old), C: all admissions (<60 months old) case fatality and D: 2–59 months old case fatality before and after July 2013. | 16        |

Table S1. List of health workers strikes during study period.

| Strike dates                       | Health workers on strike | Duration of strike in days |
|------------------------------------|--------------------------|----------------------------|
| 5 to 13 December 2011              | Doctors                  | 9                          |
| 1 to 15 March 2012                 | Nurses                   | 15                         |
| 13 September to 4 October 2012     | Doctors                  | 22                         |
| 3 December 2012 to 13 January 2013 | Nurses                   | 42                         |
| 16 January to 11 February 2013     | Nurses                   | 26                         |
| 10 to 23 December 2013             | Doctors & nurses         | 14                         |
| 5 to 14 December 2016              | Nurses                   | 11                         |
| 5 December 2016 to 15 March 2017   | Doctors                  | 102                        |
| 5 June to 2 November 2017          | Nurses                   | 150                        |

Table S2. Proportion of missing data

| <b>N=4,421</b>                    | <b>N missing</b> | <b>% missing</b> |
|-----------------------------------|------------------|------------------|
| <b>Demographics</b>               |                  |                  |
| Age in days                       | 0                |                  |
| Sex (female)                      | 0                |                  |
| BCG scar                          | 76               | 1.7              |
| Reported born premature           | 321              | 7.3              |
| Reported low birth weight         | 322              | 7.3              |
| <b>Anthropometry</b>              |                  |                  |
| Weight (kg)                       | 43               | 1.0              |
| MUAC (cm)                         | 126              | 2.9              |
| <b>Clinical features</b>          |                  |                  |
| Axillary temperature              | 34               | 0.8              |
| Tachypnea                         | 208              | 4.7              |
| Tachycardia                       | 43               | 1.0              |
| Hypoxia (SaO <sub>2</sub> <90%)   | 20               | 0.5              |
| Lower chest wall indrawing        | 68               | 1.5              |
| Wheeze                            | 69               | 1.6              |
| Stridor                           | 71               | 1.6              |
| Breathing difficulty              | 64               | 1.5              |
| Cyanosis                          | 70               | 1.6              |
| Capillary refill $\geq 2$ seconds | 34               | 0.8              |
| Temperature gradient              | 81               | 1.8              |
| Weak pulse                        | 71               | 1.6              |
| Lethargy                          | 70               | 1.6              |
| Impaired consciousness            | 70               | 1.6              |
| Bulging fontanel                  | 72               | 1.6              |
| Stiff neck                        | 71               | 1.6              |
| Convulsions                       | 64               | 1.5              |
| Sunken eyes                       | 73               | 1.7              |
| Reduced skin turgor               | 71               | 1.6              |
| Pallor                            | 70               | 1.6              |
| <b>Laboratory features</b>        |                  |                  |
| HIV antibody positive             | 756              | 17               |
| Malaria slide positive            | 372              | 8.4              |
| Bacteraemia                       | 2281             | 52               |
| Haemoglobin                       | 448              | <sup>10</sup>    |
| WBC                               | 449              | 10               |
| Platelets                         | 448              | 10               |
| Blood glucose (mmol/L)            | 1433             | 32               |

Table S3 Pathogens isolated from blood and CSF cultures of young infants resident in KHDSS during inpatient period.

| Blood culture isolates                       |         | CSF culture isolates             |         |
|----------------------------------------------|---------|----------------------------------|---------|
| Pathogen (N=178)                             | No. (%) | Pathogen (N=24)                  | No. (%) |
| <i>Klebsiella pneumoniae</i>                 | 53 (30) | <i>Escherichia coli</i>          | 6 (25)  |
| <i>Escherichia coli</i>                      | 25 (14) | Group B Streptococcus            | 6 (25)  |
| <i>Staphylococcus aureus</i>                 | 22 (12) | <i>Klebsiella pneumoniae</i>     | 3 (13)  |
| Group B Streptococcus                        | 19 (11) | <i>Streptococcus pneumoniae</i>  | 3 (13)  |
| Non-typhoidal Salmonella species             | 9 (5.1) | <i>Enterobacter cloacae</i>      | 3 (13)  |
| <i>Enterobacter cloacae</i>                  | 8 (4.5) | Non-typhoidal Salmonella species | 2 (8.2) |
| <i>Pseudomonas aeruginosa</i>                | 6 (3.4) | <i>Acinetobacter lwoffii</i>     | 1 (4.2) |
| <i>Streptococcus pneumoniae</i>              | 5 (2.8) |                                  |         |
| <i>Streptococcus pyogenes</i>                | 3 (1.7) |                                  |         |
| Acinetobacter species                        | 3 (1.7) |                                  |         |
| <i>Aeromonas hydrophila</i>                  | 3 (1.7) |                                  |         |
| Group A Streptococcus                        | 3 (1.7) |                                  |         |
| <i>Serratia marcescens</i>                   | 2 (1.1) |                                  |         |
| <i>Acinetobacter calcoaceticus/baumannii</i> | 2 (1.1) |                                  |         |
| <i>Acinetobacter lwoffii</i>                 | 1 (0.6) |                                  |         |
| <i>Aeromonas sobria</i>                      | 1 (0.6) |                                  |         |
| <i>Chryseobacterium indologenes</i>          | 1 (0.6) |                                  |         |
| <i>Enterobacter aerogenes</i>                | 1 (0.6) |                                  |         |
| Enterococci species                          | 1 (0.6) |                                  |         |
| <i>Haemophilus influenzae</i>                | 1 (0.6) |                                  |         |
| <i>Proteus mirabilis</i>                     | 1 (0.6) |                                  |         |

CSF; cerebrospinal fluid, Out of the 33 Meningitis cases, only the 24 presented had positive CSF culture.

Table S4. Annual admissions and case fatality ratios (CFR).

| Admissions/Year                 | 2009 | 2010 | 2011 | 2012 | 2013 | 2014 | 2015 | 2016 | 2017 | 2018 | 2019 |
|---------------------------------|------|------|------|------|------|------|------|------|------|------|------|
| <60 days                        | 407  | 455  | 425  | 418  | 319  | 424  | 429  | 472  | 275  | 323  | 474  |
| 2 to 59 months                  | 1734 | 1462 | 1222 | 1177 | 682  | 1050 | 1017 | 787  | 432  | 920  | 918  |
| Proportion of YI admissions     | 19%  | 24%  | 26%  | 28%  | 32%  | 29%  | 30%  | 37%  | 39%  | 26%  | 34%  |
| YI inpatient deaths             | 46   | 66   | 72   | 64   | 47   | 59   | 71   | 65   | 51   | 42   | 62   |
| YI inpatient CFR                | 11%  | 15%  | 17%  | 15%  | 15%  | 14%  | 17%  | 14%  | 19%  | 13%  | 13%  |
| YI post-discharge 1-year deaths | 19   | 24   | 17   | 18   | 25   | 15   | 21   | 19   | 10   | 15   | 25   |
| YI Post-discharge 1- year CFR   | 5.4% | 6.4% | 5.1% | 5.3% | 9.5% | 4.3% | 6.2% | 4.8% | 4.7% | 5.6% | 6.3% |

Table S5. Univariate analysis of admission features associated with inpatient deaths.

| N=4,421                    | Deaths<br>(N=645)<br>N (%) | Crude SHR        | P-value | Scaled<br>Schoenfeld<br>residuals<br>P-value |
|----------------------------|----------------------------|------------------|---------|----------------------------------------------|
| <b>Demographics</b>        |                            |                  |         |                                              |
| Age in days                |                            |                  |         |                                              |
| 0 to 2                     | 511 (19)                   | 3.31 (2.39–4.58) | <0.001  | 0.14                                         |
| 3 to 7                     | 56 (12)                    | 2.07 (1.38–3.11) | <0.001  |                                              |
| 8 to 28                    | 40 (6.8)                   | 1.15 (0.74–1.78) | 0.54    |                                              |
| >28                        | 38 (6.0)                   | Reference        |         |                                              |
| Sex (female)               | 268 (14)                   | 0.99 (0.91–1.09) | 0.93    | 0.77                                         |
| Reported born premature    | 294 (29)                   | 2.53 (2.32–3.77) | <0.001  | 0.06                                         |
| Reported low birth weight  | 222 (38)                   | 3.25 (2.97–3.56) | <0.001  | 0.18                                         |
| Born at KCH                |                            |                  |         |                                              |
| Yes                        | 382 (14)                   | Reference        |         |                                              |
| No                         | 263 (16)                   | 1.13 (0.97–1.32) | 0.12    | 0.61                                         |
| <b>Anthropometry</b>       |                            |                  |         |                                              |
| Weight (kg)                |                            |                  |         |                                              |
| <1.5                       | 213 (38)                   | 4.95 (4.13–5.93) | <0.001  | 0.09                                         |
| 1.5 to <2.5                | 174 (15)                   | 1.86(1.53–2.26)  | <0.001  |                                              |
| ≥2.5                       | 229 (8.5)                  | Reference        |         |                                              |
| Missing weight             | 29 (67)                    | 10.7 (7.60–14.9) | <0.001  |                                              |
| MUAC (cm)                  |                            |                  |         |                                              |
| <9.0                       | 333 (25)                   | 3.57 (3.07–4.15) | <0.001  | 0.08                                         |
| 9 to 10                    | 106 (12)                   | 1.73 (1.45–2.07) | <0.001  |                                              |
| 10 to 11                   | 96 (9.3)                   | 1.48 (1.24–1.77) | <0.001  |                                              |
| ≥11                        | 75 (7.1)                   | Reference        |         |                                              |
| Missing MUAC               | 35 (28)                    | 3.89 (3.02–5.00) | <0.001  |                                              |
| <b>Clinical features</b>   |                            |                  |         |                                              |
| Axillary temperature       |                            |                  |         |                                              |
| <36°C                      | 390 (29)                   | 3.13 (2.82–3.47) | <0.001  | 0.34                                         |
| 36 to 37.5°C               | 159 (9.3)                  | Reference        |         |                                              |
| >37.5°C                    | 84 (6.3)                   | 0.77 (0.67–0.88) | <0.001  |                                              |
| Missing temperature        | 12 (35)                    | 3.78 (2.65–5.39) | <0.001  |                                              |
| Respiratory rate/min       |                            |                  |         |                                              |
| Bradypnoea                 | 108 (57)                   | 6.09 (4.98–7.46) | <0.001  | 0.71                                         |
| Normal                     | 329 (12)                   | Reference        |         |                                              |
| Tachypnoea                 | 197 (13)                   | 1.07 (0.90–1.27) | 0.45    |                                              |
| Missing                    | 11 (11)                    | 0.91 (0.51–1.65) | 0.76    |                                              |
| Heart rate/min             |                            |                  |         |                                              |
| Bradycardia                | 74 (47)                    | 4.05 (3.21–5.11) | <0.001  | 0.50                                         |
| Normal                     | 403 (14)                   | Reference        |         |                                              |
| Tachycardia                | 163 (12)                   | 0.88 (0.73–1.05) | 0.15    |                                              |
| Missing                    | 5 (23)                     | 1.68 (0.72–3.93) | 0.23    |                                              |
| Hypoxia (SaO2 <90%)        | 309 (33)                   | 3.91 (3.58–4.26) | <0.001  | 0.48                                         |
| Lower chest wall indrawing | 448 (22)                   | 2.86 (2.60–3.15) | <0.001  | 0.41                                         |
| Wheeze                     | 0                          | -                |         |                                              |

|                                                                                                           |          |                  |        |      |
|-----------------------------------------------------------------------------------------------------------|----------|------------------|--------|------|
| Stridor                                                                                                   | 6 (32)   | 1.48 (0.89–2.47) | 0.13   | 0.23 |
| Breathing difficulty                                                                                      | 481 (22) | 3.62 (3.26–4.02) | <0.001 | 0.28 |
| Cyanosis                                                                                                  | 98 (47)  | 4.01 (3.55–4.53) | <0.001 | 0.14 |
| Capillary refill >2 seconds                                                                               | 61 (58)  | 5.61 (4.41–7.14) | <0.001 | 0.54 |
| Temperature gradient                                                                                      | 98 (38)  | 2.85 (2.51–3.23) | <0.001 | 0.36 |
| Weak pulse                                                                                                | 108 (69) | 5.85 (5.21–6.57) | <0.001 | 0.71 |
| Lethargy                                                                                                  | 64 (20)  | 1.20 (1.04–1.40) | 0.02   | 0.34 |
| Impaired consciousness                                                                                    | 140 (56) | 5.43 (4.91–6.00) | <0.001 | 0.42 |
| Bulging fontanel                                                                                          | 6 (19)   | 1.34 (0.90–1.99) | 0.15   | 0.08 |
| Stiff neck                                                                                                | 4 (40)   | 2.08 (1.30–3.32) | 0.002  | 0.17 |
| Convulsions                                                                                               | 16 (8.1) | 0.75 (0.61–0.93) | 0.01   | 0.53 |
| Sunken eyes                                                                                               | 5 (11)   | 1.04 (0.69–1.56) | 0.85   | 0.52 |
| Reduced skin turgor                                                                                       | 21 (22)  | 1.18 (0.91–1.52) | 0.22   | 0.56 |
| Pallor                                                                                                    | 72 (33)  | 2.47 (2.15–2.83) | <0.001 | 0.63 |
| <b>Laboratory features</b>                                                                                |          |                  |        |      |
| Meningitis                                                                                                | 8 (24)   | 8.06 (3.96–16.4) | <0.001 | 0.13 |
| Anaemia (haemoglobin <110 g/L)                                                                            | 50 (11)  | 0.67 (0.51–0.90) | 0.007  | 0.51 |
| HIV antibody positive                                                                                     | 29 (20)  | 1.39 (1.13–1.71) | 0.002  | 0.28 |
| Malaria slide positive                                                                                    | 0        | -                |        |      |
| Bacteraemia                                                                                               | 63 (37)  | 2.92 (2.10–4.06) | <0.001 | 0.13 |
| Blood glucose (mmol/L)                                                                                    |          |                  |        |      |
| <2.6                                                                                                      | 137 (16) | 1.18 (1.04–1.33) | 0.009  | 0.42 |
| 2.6 to 7.0                                                                                                | 229 (12) | Reference        |        |      |
| >7.0                                                                                                      | 71 (31)  | 2.85 (2.47–3.29) | <0.001 |      |
| Missing blood glucose                                                                                     | 208 (15) | 1.18 (1.06–1.32) | 0.002  |      |
| White blood cells (10 <sup>9</sup> cells/L)                                                               |          |                  |        |      |
| <4                                                                                                        | 14 (26)  | 2.43 (1.47–4.03) | 0.001  | 0.70 |
| 4-20                                                                                                      | 362 (11) | Reference        |        |      |
| >20                                                                                                       | 210 (30) | 2.97 (2.52–3.50) | <0.001 |      |
| Missing                                                                                                   | 59 (13)  | 1.19 (0.91–1.57) | 0.20   |      |
| Platelets (10 <sup>9</sup> /L)                                                                            |          |                  |        |      |
| <150                                                                                                      | 139 (24) | 1.89 (1.57–2.27) | <0.001 | 0.10 |
| ≥150                                                                                                      | 447 (13) | Reference        |        |      |
| Missing                                                                                                   | 59 (13)  | 1.01 (0.77–1.32) | 0.95   |      |
| SHR: sub-distribution hazard ratios; the SHR are from the Fine and Gray's proportional sub-hazards model. |          |                  |        |      |

Table S6. **Multivariable regression analysis of factors associated with inpatient mortality (single vs multiple admissions).**

|                                 | Multiple admissions (N=4421) |         | Single admissions (N=4272) |         |
|---------------------------------|------------------------------|---------|----------------------------|---------|
|                                 | Adjusted SHR*                | P-value | Adjusted SHR*              | P-value |
| <b>Demographics</b>             |                              |         |                            |         |
| Age in days                     |                              |         |                            |         |
| 0 to 2                          | 2.12 (1.46–3.06)             | <0.001  | 2.14 (1.49–3.10)           | <0.001  |
| 3 to 7                          | 3.88 (2.46–6.10)             | <0.001  | 3.92 (2.48–5.16)           | <0.001  |
| 8 to 28                         | 1.42 (0.90–2.25)             | 0.13    | 1.50 (0.95–2.38)           | 0.08    |
| >28                             | Reference                    |         | Reference                  |         |
| Sex (female)                    | 0.91 (0.78–1.07)             | 0.26    | 0.90 (0.77–1.06)           | 0.20    |
| <b>Anthropometry</b>            |                              |         |                            |         |
| Weight (kg)                     |                              |         |                            |         |
| <1.5                            | 2.16 (1.75–2.67)             | <0.001  | 2.26 (1.83–2.79)           | <0.001  |
| 1.5 to <2.5                     | 1.42 (1.16–1.74)             | 0.001   | 1.43 (1.17–1.76)           | <0.001  |
| ≥2.5                            | Reference                    |         | Reference                  |         |
| Missing weight                  | 3.85 (2.59–5.71)             | <0.001  | 3.78 (2.56–5.58)           | <0.001  |
| <b>Clinical features</b>        |                              |         |                            |         |
| Axillary temperature            |                              |         |                            |         |
| <36°C                           | 1.44 (1.17–1.78)             | 0.001   | 1.45 (1.17–1.79)           | 0.001   |
| 36 to 37.5°C                    | Reference                    |         | Reference                  |         |
| >37.5°C                         | 1.09 (0.84–1.41)             | 0.53    | 1.07 (0.83–1.39)           | 0.57    |
| Missing temperature             | 1.03 (0.38–2.75)             | 0.96    | 0.92 (0.33–2.51)           | 0.87    |
| Respiratory rate/min            |                              |         |                            |         |
| Bradypnoea                      | 1.45 (1.09–1.93)             | 0.01    | 1.44 (1.08–1.92)           | 0.01    |
| Normal                          | Reference                    |         | Reference                  |         |
| Tachypnoea                      | 0.80 (0.67–0.95)             | 0.01    | 0.79 (0.66–0.94)           | 0.009   |
| Missing                         | 1.51 (0.64–3.56)             | 0.34    | 1.48 (0.62–3.55)           | 0.38    |
| Heart rate/min                  |                              |         |                            |         |
| Bradycardia                     | 1.40 (1.08–1.82)             | 0.01    | 1.42 (1.09–1.85)           | 0.008   |
| Normal                          | Reference                    |         | Reference                  |         |
| Tachycardia                     | 1.14 (0.94–1.37)             | 0.18    | 1.15 (0.96–1.39)           | 0.14    |
| Missing                         | 0.41 (0.03–5.13)             | 0.49    | 0.45 (0.04–5.14)           | 0.52    |
| Hypoxia (SaO <sub>2</sub> <90%) | 1.62 (1.37–1.92)             | <0.001  | 1.60 (1.36–1.90)           | <0.001  |
| Capillary refill >2 seconds     | 1.34 (0.97–1.86)             | 0.08    | 1.31 (0.94–1.83)           | 0.11    |
| Lower chest wall indrawing      | 1.41 (1.14–1.75)             | 0.002   | 1.42 (1.14–1.77)           | 0.002   |
| Stridor                         | 1.93 (0.92–4.03)             | 0.08    | 1.85 (0.89–3.85)           | 0.10    |
| Breathing difficulty            | 1.45 (1.15–1.82)             | 0.001   | 1.44 (1.15–1.81)           | 0.002   |
| Weak pulse                      | 1.61 (1.19–2.17)             | 0.002   | 1.61 (1.18–2.18)           | 0.002   |
| Bulging fontanel                | 2.45 (0.91–6.65)             | 0.08    | 2.41 (0.90–6.55)           | 0.08    |
| Impaired consciousness          | 2.21 (1.72–2.84)             | <0.001  | 2.17 (1.68–2.78)           | <0.001  |
| Pallor                          | 1.30 (0.98–1.71)             | 0.07    | 1.28 (0.97–1.69)           | 0.08    |
| <b>Laboratory features</b>      |                              |         |                            |         |
| Meningitis                      | 5.45 (2.50–11.8)             | <0.001  | 5.18 (2.39–11.2)           | <0.001  |
| HIV antibody positive           | 1.15 (0.81–1.63)             | 0.43    | 1.14 (0.80–1.62)           | 0.47    |



|                                                                                                                                                                                                                                                                                                                                                                                                                                                                     |                  |        |                  |        |
|---------------------------------------------------------------------------------------------------------------------------------------------------------------------------------------------------------------------------------------------------------------------------------------------------------------------------------------------------------------------------------------------------------------------------------------------------------------------|------------------|--------|------------------|--------|
| Bacteraemia                                                                                                                                                                                                                                                                                                                                                                                                                                                         | 2.21 (1.51–3.22) | <0.001 | 2.20 (1.51–3.20) | <0.001 |
| White blood cells (10 <sup>9</sup> cells/L)                                                                                                                                                                                                                                                                                                                                                                                                                         |                  |        |                  |        |
| <4                                                                                                                                                                                                                                                                                                                                                                                                                                                                  | 2.17 (1.30–3.62) | 0.003  | 2.11 (1.27–3.50) | 0.003  |
| 4-20                                                                                                                                                                                                                                                                                                                                                                                                                                                                | Reference        |        | Reference        |        |
| >20                                                                                                                                                                                                                                                                                                                                                                                                                                                                 | 1.71 (1.43–2.04) | <0.001 | 1.70 (1.43–2.03) | <0.001 |
| unavailable                                                                                                                                                                                                                                                                                                                                                                                                                                                         | 1.09 (0.82–1.44) | 0.57   | 1.06 (0.79–1.41) | 0.71   |
| Model performance                                                                                                                                                                                                                                                                                                                                                                                                                                                   |                  |        |                  |        |
| Bootstrapped AUC (95% CI)                                                                                                                                                                                                                                                                                                                                                                                                                                           | 0.88 (0.86–0.89) |        | 0.88 (0.86–0.89) |        |
| SHR; sub-distribution hazard ratios; *the SHR are from the Fine and Gray's proportional sub-hazards model, AUC; area under receiver operating characteristics. Meningitis: positive CSF culture, or positive CSF microscopy, or positive CSF antigen test, or elevated CSF WBC count ( $\geq 0.02 \times 10^9/L$ in young infants aged 0-28 days OR, $\geq 0.01 \times 10^9/L$ in young infants aged 29-59 days) PLUS a positive blood culture for a known pathogen |                  |        |                  |        |

Table S7. Estimated causes of post-discharge deaths during readmission at KCH (67 deaths).

| <b>Index admission diagnosis (N=67)</b> | <b>No. (%)</b> | <b>Causes of post-discharge deaths (N=67)</b> | <b>No. (%)</b> |
|-----------------------------------------|----------------|-----------------------------------------------|----------------|
| Neonatal sepsis                         | 15 (22)        | Neonatal sepsis                               | 16 (24)        |
| Preterm complications                   | 15 (22)        | Preterm complications                         | 15 (22)        |
| Heart disease-Congenital                | 9 (13)         | Heart disease-Congenital                      | 10 (15)        |
| Neonatal jaundice                       | 5 (7.5)        | Neonatal jaundice                             | 5 (7.4)        |
| Meningitis                              | 4 (6.0)        | Meningitis                                    | 5 (7.4)        |
| Birth asphyxia                          | 4 (6.0)        | Birth asphyxia                                | 5 (7.4)        |
| Lower respiratory tract infection       | 4 (6.0)        | Lower respiratory tract infection             | 4 (6.0)        |
| Encephalopathy - unknown                | 0              | Encephalopathy - unknown                      | 1 (1.5)        |
| Hydrocephalus                           | 1 (1.5)        | Hydrocephalus                                 | 1 (1.5)        |
| Malnutrition                            | 1 (1.5)        | None specified                                | 5 (7.4)        |
| None specified                          | 9 (13)         |                                               |                |

Index admission diagnosis and causes of death were assigned by treating clinician.

Table S8. Univariate analysis of admission features associated with post-discharge deaths.

| N=3625                                           | Deaths (N=208) | Crude HR         | P-value | Scaled Schoenfeld residuals P-value |
|--------------------------------------------------|----------------|------------------|---------|-------------------------------------|
| <b>Demographics</b>                              |                |                  |         |                                     |
| Age in days                                      |                |                  |         |                                     |
| 0 to 2                                           | 124 (5.6)      | 0.98 (0.67–1.44) | 0.92    | 0.10                                |
| 3 to 7                                           | 15 (3.7)       | 0.63 (0.34–1.16) | 0.14    |                                     |
| 8 to 28                                          | 36 (6.6)       | 1.17 (0.73–1.87) | 0.52    |                                     |
| >28                                              | 33 (5.5)       | Reference        |         |                                     |
| Sex (female)                                     | 89 (5.5)       | 0.98 (0.74–1.28) | 0.86    | 0.79                                |
| Reported born premature                          | 58 (8.0)       | 1.79 (1.32–2.44) | <0.001  | 0.07                                |
| Reported low birth weight                        | 33 (9.3)       | 1.99 (1.37–2.90) | <0.001  | 0.13                                |
| Born at KCH                                      |                |                  |         |                                     |
| Yes                                              | 102 (4.3)      | Reference        |         |                                     |
| No                                               | 106 (7.6)      | 1.75 (1.34–2.30) | <0.001  | 0.12                                |
| Length of hospitalization (days)-log transformed | -              | 1.96 (1.68–2.27) | <0.001  | 0.38                                |
| Discharged over weekend                          |                |                  |         |                                     |
| No                                               | 173 (5.7)      | Reference        |         |                                     |
| Yes                                              | 35 (4.8)       | 0.85 (0.59–1.23) | 0.39    | 0.16                                |
| Type of discharge                                |                |                  |         |                                     |
| Normal discharge                                 | 180 (4.9)      | Reference        |         | 0.75                                |
| Absconded                                        | 5 (12)         | 2.60 (1.07–6.33) | 0.04    |                                     |
| Transferred/referred                             | 23 (44)        | 11.8 (7.64–18.2) | <0.001  |                                     |
| <b>Anthropometry</b>                             |                |                  |         |                                     |
| Weight (kg)                                      |                |                  |         |                                     |
| <1.5                                             | 30 (8.5)       | 2.49 (1.65–3.77) | <0.001  | 0.17                                |
| 1.5 to <2.5                                      | 87 (9.2)       | 2.64 (1.97–3.54) | <0.001  |                                     |
| ≥2.5                                             | 91 (3.7)       | Reference        |         |                                     |
| Missing weight                                   | 0              | -                |         |                                     |
| MUAC (cm)                                        |                |                  |         |                                     |
| <9.0                                             | 88 (8.8)       | 4.05 (2.56–6.41) | <0.001  | 0.17                                |
| 9 to 10                                          | 44 (5.8)       | 2.56 (1.55–4.24) | <0.001  |                                     |
| 10 to 11                                         | 42 (4.5)       | 1.92 (1.15–3.18) | 0.01    |                                     |
| ≥11                                              | 23 (2.4)       | Reference        |         |                                     |
| Missing MUAC                                     | 11 (12)        | 5.83 (2.84–12.0) | <0.001  |                                     |
| <b>Clinical features</b>                         |                |                  |         |                                     |
| Axillary temperature                             |                |                  |         |                                     |
| <36°C                                            | 78 (8.1)       | 1.45 (1.07–1.96) | 0.02    | 0.80                                |
| 36 to 37.5°C                                     | 88 (5.7)       | Reference        |         |                                     |
| >37.5°C                                          | 41 (3.3)       | 0.57 (0.40–0.83) | 0.003   |                                     |
| Missing temperature                              | 1 (5.0)        | 0.99 (0.14–7.12) | 0.99    |                                     |
| Respiratory rate/min                             |                |                  |         |                                     |
| Bradypnoea                                       | 7 (8.8)        | 1.92 (0.90–4.13) | 0.09    | 0.30                                |
| Normal                                           | 108 (4.7)      | Reference        |         |                                     |
| Tachypnoea                                       | 87 (6.8)       | 1.44 (1.09–1.92) | 0.01    |                                     |
| Missing                                          | 6 (7.2)        | 1.65 (0.72–3.76) | 0.23    |                                     |
| Heart rate/min                                   |                |                  |         |                                     |

|                                        |           |                  |       |      |
|----------------------------------------|-----------|------------------|-------|------|
| Bradycardia                            | 9 (11)    | 2.10 (1.07–4.13) | 0.03  | 0.73 |
| Normal                                 | 137 (5.5) | Reference        |       |      |
| Tachycardia                            | 62 (5.3)  | 0.97 (0.72–1.31) | 0.85  |      |
| Missing                                | 0         | -                |       |      |
| Hypoxia (SaO <sub>2</sub> <90%)        | 51 (8.2)  | 1.68 (1.23–2.31) | 0.001 | 0.54 |
| Lower chest wall indrawing             | 108 (6.8) | 1.54 (1.17–2.02) | 0.002 | 0.18 |
| Wheeze                                 | 2 (4.4)   | 0.77 (0.19–3.10) | 0.71  | 0.20 |
| Stridor                                | 0         | -                |       |      |
| Breathing difficulty                   | 109 (6.5) | 1.40 (1.07–1.85) | 0.02  | 0.26 |
| Cyanosis                               | 7 (6.3)   | 1.14 (0.54–2.43) | 0.73  | 0.17 |
| Capillary refill ≥2 seconds            | 4 (9.4)   | 1.81 (0.67–4.87) | 0.24  | 0.40 |
| Temperature gradient                   | 12 (7.5)  | 1.44 (0.80–2.57) | 0.23  | 0.22 |
| Weak pulse                             | 7 (15)    | 3.10 (1.46–6.59) | 0.003 | 0.38 |
| Lethargy                               | 14 (5.8)  | 1.06 (0.63–1.80) | 0.82  | 0.19 |
| Impaired consciousness                 | 6 (5.5)   | 0.98 (0.44–2.21) | 0.96  | 0.50 |
| Bulging fontanel                       | 4 (15)    | 3.04 (1.13–8.18) | 0.03  | 0.06 |
| Stiff neck                             | 1 (17)    | 2.84 (0.40–20.2) | 0.30  | 0.15 |
| Convulsions                            | 9 (5.0)   | 0.88 (0.46–1.75) | 0.75  | 0.31 |
| Sunken eyes                            | 6 (15)    | 3.31 (1.47–7.45) | 0.004 | 0.20 |
| Reduced skin turgor                    | 8 (11)    | 2.19 (1.08–4.43) | 0.03  | 0.20 |
| Pallor                                 | 15 (10)   | 2.09 (1.23–3.53) | 0.006 | 0.23 |
| <b>Laboratory features</b>             |           |                  |       |      |
| Meningitis                             | 4 (16)    | 3.98 (1.45–10.9) | 0.007 | 0.13 |
| Anaemia (haemoglobin <110 g/L)         | 26 (6.2)  | 1.19 (0.79–1.80) | 0.41  | 0.68 |
| HIV antibody positive                  | 7 (6.2)   | 1.17 (0.55–2.49) | 0.69  | 0.76 |
| Malaria slide positive                 | 0         | -                |       |      |
| Bacteraemia                            | 10 (9.4)  | 1.02 (0.50–2.06) | 0.96  | 0.28 |
| Blood glucose (mmol/L)                 |           |                  |       |      |
| <2.6                                   | 51 (6.9)  | 1.31 (0.92–1.85) | 0.13  | 0.25 |
| 2.6 to 7.0                             | 86 (5.3)  | Reference        |       |      |
| >7.0                                   | 10 (6.3)  | 1.21 (0.63–2.32) | 0.57  |      |
| Missing blood glucose                  | 61 (5.0)  | 0.95 (0.68–1.32) | 0.75  |      |
| White blood cells (10 <sup>9</sup> /L) |           |                  |       |      |
| <4                                     | 1 (2.5)   | 0.45 (0.06–3.20) | 0.42  | 0.79 |
| 4-20                                   | 157 (5.5) | Reference        |       |      |
| >20                                    | 29 (6.1)  | 1.10 (0.74–1.64) | 0.63  |      |
| Missing                                | 21 (5.4)  | 0.99 (0.63–1.56) | 0.97  |      |
| Platelets (10 <sup>9</sup> /L)         |           |                  |       |      |
| <150                                   | 38 (8.6)  | 1.69 (1.18–2.41) | 0.004 | 0.70 |
| ≥150                                   | 149 (5.1) | Reference        |       |      |
| Missing                                | 21 (5.4)  | 1.08 (0.68–1.70) | 0.75  |      |

HR: hazard ratios; the HR are from the Cox proportional hazards model.

Table S9. Univariate regression analysis of factors associated with inpatient and post-discharge mortality among children born at KCH only.

| N=1,358                  | Deaths<br>(N=174)<br>N (%) | Crude SHR        | P-value | Scaled<br>Schoenfeld<br>residuals P-<br>value |
|--------------------------|----------------------------|------------------|---------|-----------------------------------------------|
| <b>Demographics</b>      |                            |                  |         |                                               |
| Age in days              |                            |                  |         |                                               |
| 0 to 2                   | 151 (15)                   | 2.48 (1.19–5.16) | 0.02    | 0.26                                          |
| 3 to 7                   | 8 (7.0)                    | 1.22 (0.45–3.30) | 0.69    |                                               |
| 8 to 28                  | 8 (6.8)                    | 1.21 (0.46–3.23) | 0.70    |                                               |
| >28                      | 7 (5.5)                    | Reference        |         |                                               |
| Sex (female)             | 84 (14)                    | 1.11 (0.83–1.48) | 0.50    | 0.31                                          |
| Born premature           | 101 (21)                   | 2.65 (1.97–3.56) | <0.001  | 0.10                                          |
| Born low birth weight    | 107 (21)                   | 2.74 (2.03–3.71) | <0.001  | 0.44                                          |
| <b>Anthropometry</b>     |                            |                  |         |                                               |
| Weight z score at birth  |                            |                  |         |                                               |
| <-2.0                    | 32 (17)                    | 1.49 (1.02–2.17) | 0.04    | 0.12                                          |
| ≥-2.0                    | 142 (12)                   | Reference        |         |                                               |
| MUAC (cm)                |                            |                  |         |                                               |
| <9.0                     | 97 (23)                    | 3.14 (2.05–4.83) | <0.001  | 0.17                                          |
| 9 to 10                  | 26 (9.9)                   | 1.26 (0.74–2.17) | 0.40    |                                               |
| 10 to 11                 | 25 (7.3)                   | 0.91 (0.53–1.57) | 0.73    |                                               |
| ≥11                      | 26 (7.9)                   | Reference        |         |                                               |
| Missing MUAC             | 0                          | -                |         |                                               |
| <b>Clinical features</b> |                            |                  |         |                                               |
| Axillary temperature     |                            |                  |         |                                               |
| <36°C                    | 113 (26)                   | 3.02 (2.13–4.27) | <0.001  | 0.30                                          |
| 36 to 37.5°C             | 41 (9.2)                   | Reference        |         |                                               |
| >37.5°C                  | 18 (3.9)                   | 0.42 (0.24–0.72) | 0.002   |                                               |
| Missing temperature      | 2 (50)                     | 6.90 (1.84–25.8) | 0.004   |                                               |
| Respiratory rate/min     |                            |                  |         |                                               |
| Bradypnoea               | 32 (52)                    | 6.44 (4.39–9.45) | <0.001  | 0.17                                          |
| Normal                   | 91 (10)                    | Reference        |         |                                               |
| Tachypnoea               | 50 (12)                    | 1.21 (0.86–1.69) | 0.28    |                                               |
| Missing                  | 1 (5.3)                    | 0.49 (0.07–3.37) | 0.47    |                                               |
| Heart rate/min           |                            |                  |         |                                               |
| Bradycardia              | 21 (43)                    | 4.76 (3.06–7.43) | <0.001  | 0.81                                          |
| Normal                   | 98 (10)                    | Reference        |         |                                               |
| Tachycardia              | 55 (15)                    | 1.48 (1.07–2.05) | 0.02    |                                               |

|                                                                                                           |          |                  |        |      |
|-----------------------------------------------------------------------------------------------------------|----------|------------------|--------|------|
| Missing                                                                                                   | 0        | -                |        |      |
| Hypoxia (SaO <sub>2</sub> <90%)                                                                           | 79 (29)  | 3.62 (2.71–4.83) | <0.001 | 0.81 |
| Lower chest wall indrawing                                                                                | 125 (21) | 3.57 (2.57–4.95) | <0.001 | 0.47 |
| Wheeze                                                                                                    | 0        | -                |        |      |
| Stridor                                                                                                   | 5 (63)   | 6.96 (3.09–15.7) | <0.001 | 0.60 |
| Breathing difficulty                                                                                      | 481 (22) | 5.40 (3.69–7.88) | <0.001 | 0.18 |
| Cyanosis                                                                                                  | 29 (48)  | 5.15 (3.54–7.50) | <0.001 | 0.18 |
| Capillary refill >2 seconds                                                                               | 14 (64)  | 7.22 (4.43–11.7) | <0.001 | 0.58 |
| Temperature gradient                                                                                      | 26 (30)  | 2.69 (1.81–4.01) | <0.001 | 0.49 |
| Weak pulse                                                                                                | 25 (58)  | 6.52 (4.44–9.56) | <0.001 | 0.77 |
| Lethargy                                                                                                  | 17 (16)  | 1.29 (0.79–2.10) | 0.31   | 0.56 |
| Impaired consciousness                                                                                    | 48 (52)  | 6.75 (4.93–9.24) | <0.001 | 0.13 |
| Bulging fontanel                                                                                          | 1 (25)   | 2.03 (0.31–13.2) | 0.46   | 0.59 |
| Stiff neck                                                                                                | 1 (5.3)  | -                |        | 0.31 |
| Convulsions                                                                                               | 1 (2.9)  | 0.21 (0.03–1.48) | 0.12   | 0.21 |
| Sunken eyes                                                                                               | 1 (17)   | 1.35 (0.19–9.77) | 0.77   | 0.57 |
| Reduced skin turgor                                                                                       | 1 (5.9)  | 0.44 (0.06–3.19) | 0.42   | 0.56 |
| Pallor                                                                                                    | 21 (42)  | 4.00 (2.61–6.12) | <0.001 | 0.59 |
| <b>Laboratory features</b>                                                                                |          |                  |        |      |
| Meningitis                                                                                                | 2 (29)   | 9.95 (2.37–41.8) | 0.002  | 0.12 |
| Haemoglobin <110 g/L                                                                                      | 11 (13)  | 0.92 (0.51–1.66) | 0.78   | 0.25 |
| HIV antibody positive                                                                                     | 8 (21)   | 1.68 (0.84–3.33) | 0.14   | 0.14 |
| Malaria slide positive                                                                                    | 0        | -                |        |      |
| Bacteraemia                                                                                               | 14 (33)  | 3.00 (1.48–5.95) | 0.002  | 0.20 |
| Blood glucose (mmol/L)                                                                                    |          |                  |        |      |
| <2.6                                                                                                      | 33 (12)  | 1.02 (0.67–1.56) | 0.91   | 0.95 |
| 2.6 to 7.0                                                                                                | 58 (12)  | Reference        |        |      |
| >7.0                                                                                                      | 11 (21)  | 1.88 (1.00–3.54) | 0.05   |      |
| Missing blood glucose                                                                                     | 72 (13)  | 1.11 (0.79–1.56) | 0.53   |      |
| White blood cells (10 <sup>9</sup> /L)                                                                    |          |                  |        |      |
| <4                                                                                                        | 3 (33)   | 3.52 (1.25–9.91) | 0.02   | 0.08 |
| 4–20                                                                                                      | 100 (10) | Reference        |        |      |
| >20                                                                                                       | 59 (28)  | 3.10 (2.27–4.24) | <0.001 |      |
| Missing                                                                                                   | 12 (8.2) | 0.82 (0.45–1.48) | 0.50   |      |
| Platelets (10 <sup>9</sup> /L)                                                                            |          |                  |        |      |
| <150                                                                                                      | 35 (20)  | 1.69 (1.18–2.44) | 0.005  | 0.50 |
| ≥150                                                                                                      | 127 (12) | Reference        |        |      |
| Missing                                                                                                   | 12 (8.2) | 0.66 (0.37–1.19) | 0.17   |      |
| SHR; sub-distribution hazard ratios; the SHR are from the Fine and Gray's proportional sub-hazards model. |          |                  |        |      |

Table S10. Multivariable regression analysis of factors associated with inpatient and post-discharge mortality among children born at KCH only.

|                                                                                                                                                                                                                                                                                               | Inpatient analysis |         | Post-discharge analysis |         |
|-----------------------------------------------------------------------------------------------------------------------------------------------------------------------------------------------------------------------------------------------------------------------------------------------|--------------------|---------|-------------------------|---------|
|                                                                                                                                                                                                                                                                                               | Adjusted SHR*      | P-value | Adjusted HR             | P-value |
| <b>Demographics</b>                                                                                                                                                                                                                                                                           |                    |         |                         |         |
| Age in days                                                                                                                                                                                                                                                                                   |                    |         |                         |         |
| 0 to 2                                                                                                                                                                                                                                                                                        | 3.03 (1.33–6.94)   | 0.009   | ¶                       |         |
| 3 to 7                                                                                                                                                                                                                                                                                        | 4.08 (1.48–11.3)   | 0.007   | ¶                       |         |
| 8 to 28                                                                                                                                                                                                                                                                                       | 2.57 (0.90–7.29)   | 0.08    | ¶                       |         |
| >28                                                                                                                                                                                                                                                                                           | Reference          |         |                         |         |
| <b>Anthropometry</b>                                                                                                                                                                                                                                                                          |                    |         |                         |         |
| Low birth weight                                                                                                                                                                                                                                                                              | 1.55 (1.10–2.20)   | 0.01    | 2.76 (1.30–5.82)        | 0.008   |
| <b>Clinical features</b>                                                                                                                                                                                                                                                                      |                    |         |                         |         |
| Axillary temperature                                                                                                                                                                                                                                                                          |                    |         |                         |         |
| <36°C                                                                                                                                                                                                                                                                                         | 1.49 (0.97–2.28)   | 0.07    | 1.44 (0.71–2.95)        | 0.31    |
| 36 to 37.5°C                                                                                                                                                                                                                                                                                  | Reference          |         | Reference               |         |
| >37.5°C                                                                                                                                                                                                                                                                                       | 0.67 (0.39–1.13)   | 0.13    | 0.22 (0.06–0.78)        | 0.02    |
| Missing temperature                                                                                                                                                                                                                                                                           | 3.37 (0.85–13.4)   | 0.09    | 0.48 (0.09–2.64)        | 0.40    |
| Respiratory rate/min                                                                                                                                                                                                                                                                          |                    |         |                         |         |
| Bradypnoea                                                                                                                                                                                                                                                                                    | 2.22 (1.36–3.63)   | 0.001   | ¶                       |         |
| Normal                                                                                                                                                                                                                                                                                        | Reference          |         |                         |         |
| Tachypnoea                                                                                                                                                                                                                                                                                    | 0.78 (0.55–1.11)   | 0.17    | ¶                       |         |
| Missing                                                                                                                                                                                                                                                                                       | -                  |         |                         |         |
| Heart rate/min                                                                                                                                                                                                                                                                                |                    |         |                         |         |
| Bradycardia                                                                                                                                                                                                                                                                                   | 1.88 (1.14–3.12)   | 0.01    | 3.56 (1.14–11.2)        | 0.03    |
| Normal                                                                                                                                                                                                                                                                                        | Reference          |         | Reference               |         |
| Tachycardia                                                                                                                                                                                                                                                                                   | 1.57 (1.11–2.21)   | 0.01    | 1.54 (0.77–3.07)        | 0.22    |
| Missing                                                                                                                                                                                                                                                                                       | 0.25 (0.02–3.00)   | 0.28    | -                       |         |
| Hypoxia (SaO <sub>2</sub> <90%)                                                                                                                                                                                                                                                               | 1.60 (1.14–2.24)   | 0.006   | ¶                       |         |
| Lower chest wall indrawing                                                                                                                                                                                                                                                                    | 1.42 (0.91–2.22)   | 0.12    | ¶                       |         |
| Stridor                                                                                                                                                                                                                                                                                       | 3.74 (1.87–7.49)   | <0.001  | ¶                       |         |
| Breathing difficulty                                                                                                                                                                                                                                                                          | 2.13 (1.25–3.64)   | 0.005   | ¶                       |         |
| Capillary refill >2 seconds                                                                                                                                                                                                                                                                   | 1.94 (1.06–3.56)   | 0.03    | ¶                       |         |
| Weak pulse                                                                                                                                                                                                                                                                                    | 2.15 (1.27–3.65)   | 0.004   | 1.60 (0.24–10.5)        | 0.63    |
| Pallor                                                                                                                                                                                                                                                                                        | 2.36 (1.46–3.83)   | <0.001  | ¶                       |         |
| <b>Laboratory features</b>                                                                                                                                                                                                                                                                    |                    |         |                         |         |
| Bacteraemia                                                                                                                                                                                                                                                                                   | 2.50 (1.20–5.22)   | 0.02    | 0.21 (0.03–1.81)        | 0.16    |
| <b>Model performance</b>                                                                                                                                                                                                                                                                      |                    |         |                         |         |
| AUC (95% CI)                                                                                                                                                                                                                                                                                  | 0.85 (0.82–0.88)   |         | 0.79 (0.72–0.85)        |         |
| SHR; sub-distribution hazard ratios; *the SHR are from the Fine and Gray's proportional subhazards model, HR-Hazard ratio from the Proportional Cox regression model, ¶; variables not selected for inclusion in the multivariable model, AUC; area under receiver operating characteristics. |                    |         |                         |         |

Figure S1. **A: Monthly all young infant admissions, B: all admissions (<60 months old), C: all admissions (<60 months old) case fatality and D: 2–59 months old case fatality before and after July 2013.**

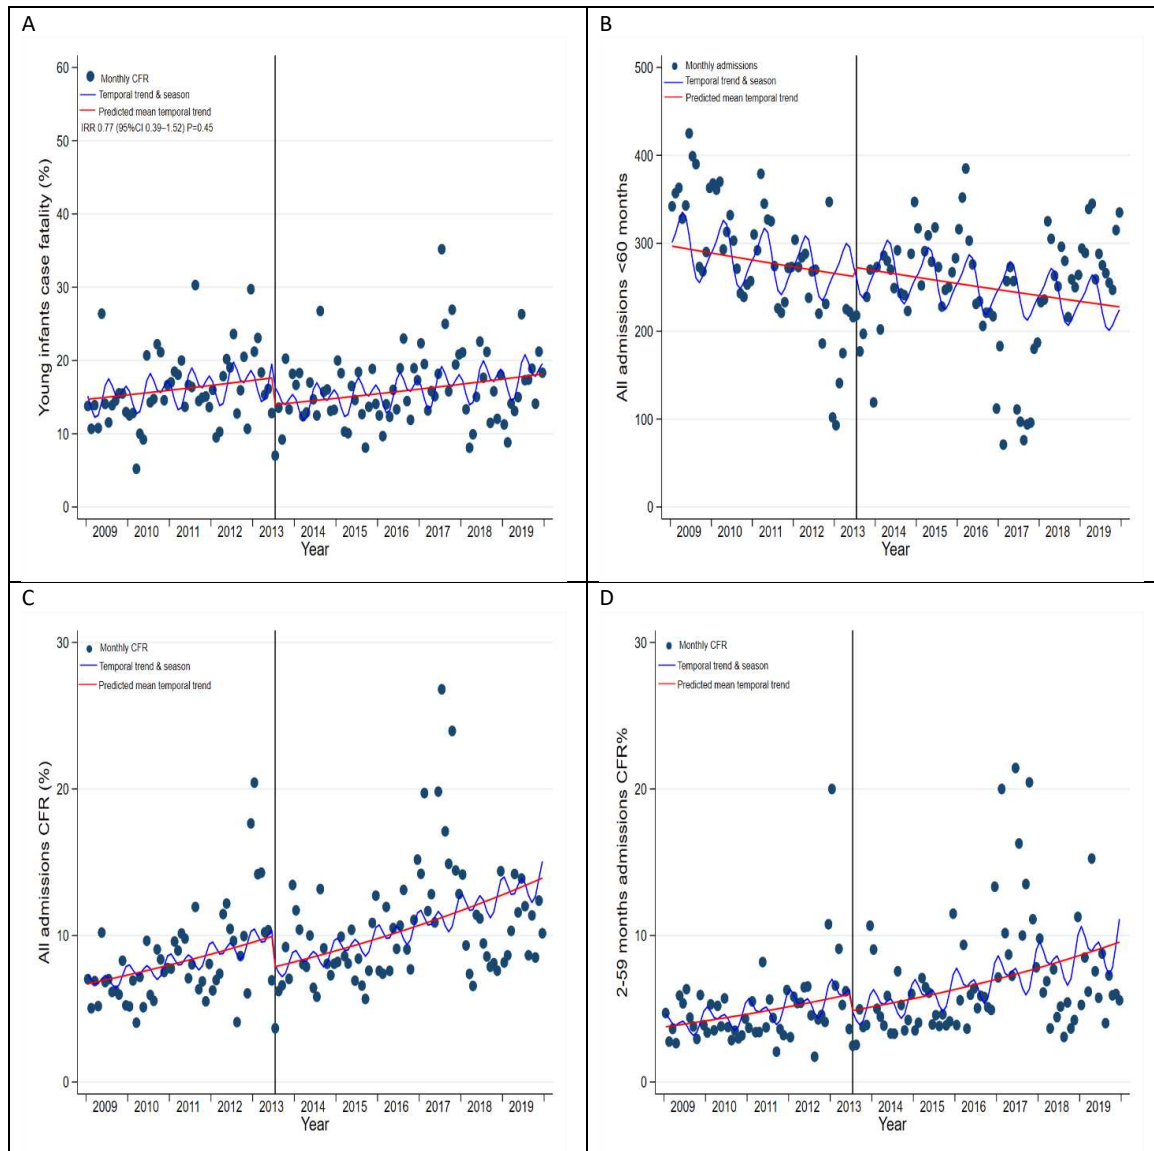

Supplement: bmjopen-2022-067482supp001.pdf [file bmjopen-2022-067482supp001.pdf]
